# Supplementary material for: COVID-19 prevention and treatment information on the internet: a systematic analysis and quality assessment
Source: PubMed Central journal article supplement — BMJ Open. 2020 Sep 10;10(9):e040487. doi: 10.1136/bmjopen-2020-040487 (PMC7485261; doi:10.1136/bmjopen-2020-040487), 2020-09-10
Supplement: bmjopen-2020-040487.draft_revisions.pdf [file bmjopen-2020-040487.draft_revisions.pdf]

# BMJ Open

BMJ Open is committed to open peer review. As part of this commitment we make the peer review history of every article we publish publicly available.

When an article is published we post the peer reviewers' comments and the authors' responses online. We also post the versions of the paper that were used during peer review. These are the versions that the peer review comments apply to.

The versions of the paper that follow are the versions that were submitted during the peer review process. They are not the versions of record or the final published versions. They should not be cited or distributed as the published version of this manuscript.

BMJ Open is an open access journal and the full, final, typeset and author-corrected version of record of the manuscript is available on our site with no access controls, subscription charges or pay-per-view fees (<http://bmjopen.bmj.com>).

If you have any questions on BMJ Open's open peer review process please email [info.bmjopen@bmj.com](mailto:info.bmjopen@bmj.com)

# BMJ Open

## A systematic analysis and quality assessment of COVID-19 treatment and prevention information on the Internet

|                               |                                                                                                                                                                                                                                                                                                                                                                                                                                                                                                                                                                                                |
|-------------------------------|------------------------------------------------------------------------------------------------------------------------------------------------------------------------------------------------------------------------------------------------------------------------------------------------------------------------------------------------------------------------------------------------------------------------------------------------------------------------------------------------------------------------------------------------------------------------------------------------|
| Journal:                      | <i>BMJ Open</i>                                                                                                                                                                                                                                                                                                                                                                                                                                                                                                                                                                                |
| Manuscript ID                 | bmjopen-2020-040487                                                                                                                                                                                                                                                                                                                                                                                                                                                                                                                                                                            |
| Article Type:                 | Original research                                                                                                                                                                                                                                                                                                                                                                                                                                                                                                                                                                              |
| Date Submitted by the Author: | 15-May-2020                                                                                                                                                                                                                                                                                                                                                                                                                                                                                                                                                                                    |
| Complete List of Authors:     | Fan, Ka Siu; St George's University Hospitals NHS Foundation Trust, Ghani, Shahi; St George's University Hospitals NHS Foundation Trust Machairas, Nikolaos ; Royal Free Hospital, Department of HPB Surgery and Liver Transplant<br>Lenti, Lorenzo; St George's University Hospitals NHS Foundation Trust<br>Fan, Ka Hay; Imperial College London<br>Richardson, Daniel; St George's University Hospitals NHS Foundation Trust<br>Scott, Aneya; St George's University Hospitals NHS Foundation Trust<br>Raptis, Dimitri; Royal Free Hospital, Department of HPB Surgery and Liver Transplant |
| Keywords:                     | World Wide Web technology < BIOTECHNOLOGY & BIOINFORMATICS, Health informatics < BIOTECHNOLOGY & BIOINFORMATICS, JOURNALISM (see Medical Journalism)                                                                                                                                                                                                                                                                                                                                                                                                                                           |
|                               |                                                                                                                                                                                                                                                                                                                                                                                                                                                                                                                                                                                                |

SCHOLARONE™  
Manuscripts

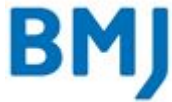

I, the Submitting Author has the right to grant and does grant on behalf of all authors of the Work (as defined in the below author licence), an exclusive licence and/or a non-exclusive licence for contributions from authors who are: i) UK Crown employees; ii) where BMJ has agreed a CC-BY licence shall apply, and/or iii) in accordance with the terms applicable for US Federal Government officers or employees acting as part of their official duties; on a worldwide, perpetual, irrevocable, royalty-free basis to BMJ Publishing Group Ltd ("BMJ") its licensees and where the relevant Journal is co-owned by BMJ to the co-owners of the Journal, to publish the Work in this journal and any other BMJ products and to exploit all rights, as set out in our [licence](#).

The Submitting Author accepts and understands that any supply made under these terms is made by BMJ to the Submitting Author unless you are acting as an employee on behalf of your employer or a postgraduate student of an affiliated institution which is paying any applicable article publishing charge ("APC") for Open Access articles. Where the Submitting Author wishes to make the Work available on an Open Access basis (and intends to pay the relevant APC), the terms of reuse of such Open Access shall be governed by a Creative Commons licence – details of these licences and which [Creative Commons](#) licence will apply to this Work are set out in our licence referred to above.

Other than as permitted in any relevant BMJ Author's Self Archiving Policies, I confirm this Work has not been accepted for publication elsewhere, is not being considered for publication elsewhere and does not duplicate material already published. I confirm all authors consent to publication of this Work and authorise the granting of this licence.

## Cover Letter

Dear Editor,

We would like to submit to you the manuscript under the title of “A systematic analysis and quality assessment of COVID-19 treatment and prevention information on the Internet”.

Our work sets out to evaluate the quality of information available to the public regarding both the treatment and prevention of COVID-19 using validated assessment tools. These tools, which have been used in the past to assess quality, include the Ensuring Quality Information for Patients (EQIP) tool, JAMA benchmark and the DISCERN tool, all of which have been proven to be robust and effective at assessing online health information.

To the best of our knowledge this is the first study to evaluate the nature and quality of information regarding COVID-19 currently available to the public. Our findings indicate that most websites were unable to provide adequate information on both treatment and preventative methods and were generally of poor quality. Without interventions to improve these websites, they will likely impact the awareness and actions of the wider public and, by extension, affect the efficacy of public health measures. Our study reflects the ongoing need for high quality information while it is still possible to influence its dissemination, especially for countries that are now entering the growth phase.

We believe that this report as well as the subtopics it addresses will be of interest for the readers of your respectable journal.

We hereby certify that the authors of the above manuscript have all: 1) Conceived, planned, and performed the work leading to this article, 2) Written the article or reviewed successive versions and shared in their revisions, 3) Approved the final version. Further, we certify that this work has neither been published in whole or in part elsewhere nor is under consideration elsewhere, and we accept full responsibility for the design and conduct of the study.

Yours sincerely,

Ka Siu Fan, BSc and Shahi Abdul Ghani, MSc, DHMSA

On behalf of Dimitri Aristotle Raptis, MD, MSc, PhD and the authors

1  
2  
3 **A systematic analysis and quality assessment of COVID-19 treatment and prevention information**  
4  
5 **on the Internet**

6  
7 Ka Siu Fan, BSc\*<sup>1</sup>, Shahi Abdul Ghani, MSc, DHMSA\*<sup>1</sup>, Nikolaos Machairas, MD, PhD<sup>2</sup>, Lorenzo  
8 Lenti, BSc<sup>1</sup>, Ka Hay Fan<sup>3</sup>, Daniel Richardson, BSc<sup>1</sup>, Aneya Scott, MChem<sup>1</sup>, Dimitri Aristotle Raptis  
9 MD, MSc, PhD<sup>2</sup>

10  
11  
12  
13 \*Ka Siu Fan and Shahi Abdul Ghani contributed equally to this paper.

- 14  
15  
16 1. St. Georges University of London, UK  
17  
18 2. Department of HPB Surgery and Liver Transplant, Royal Free Hospital, London, UK  
19  
20 3. Imperial College London, UK  
21  
22

23  
24 **Corresponding author:**

25  
26 Dr Dimitri Aristotle Raptis MD, MSc, PhD

27  
28 Department of HPB Surgery and Liver Transplant

29  
30 Royal Free Hospital, London, UK

31  
32 [Dimitri.Raptis@NHS.net](mailto:Dimitri.Raptis@NHS.net)  
33  
34  
35  
36

37 **Conflict of interest:** The authors have no conflicts of interests or funding sources to disclose  
38  
39  
40

41 **Acknowledgements:** None  
42  
43  
44

45 **Patient and Public Involvement:** There were no patient or public involvement in the conception,  
46 design or data collection of the study or in the production of the manuscript.  
47  
48  
49  
50

51 **Statement of Author Contribution:**

52  
53 Study conception and design: DAR, NM, SAG, KSF

54  
55 Acquisition of data: SAG, KSF, LL, KHF, DR, AS

56  
57 Analysis and interpretation of data: KSF, SAG, NM, DAR

58  
59 Drafting of manuscript: KSF, SAG, NM, KHF  
60

1  
2  
3 Critical revision: KSF, SAG, NM, DAR  
4  
5  
6

7 **Word count:** 4482  
8

9 **Keywords:** Coronavirus, Internet, Patient Education Handout, Public Health Informatics, Search  
10  
11 Engine  
12  
13  
14  
15  
16  
17  
18  
19  
20  
21  
22  
23  
24  
25  
26  
27  
28  
29  
30  
31  
32  
33  
34  
35  
36  
37  
38  
39  
40  
41  
42  
43  
44  
45  
46  
47  
48  
49  
50  
51  
52  
53  
54  
55  
56  
57  
58  
59  
60

For peer review only

## Abstract

**Objective:** To evaluate the quality of information regarding the treatment and prevention of COVID-19 available to the general public from all countries.

**Design:** Systematic analysis using the 'Ensuring Quality Information for Patients' (EQIP) tool (score 0-36), JAMA benchmark (score 0-4) and the DISCERN tool (score 16-80) to analyse websites containing information targeted at the general public.

**Data Sources:** Twelve popular search terms, including 'Coronavirus', 'COVID 19', 'Wuhan virus', 'How to treat coronavirus' and 'COVID 19 Prevention' were identified by 'Google Trends'. The first 100 websites for each term were identified and evaluated on its quality of information.

**Eligibility Criteria for selecting studies:** All websites written in English language, and provides information on prevention or treatment of COVID-19 intended for the general public were considered eligible. Any websites intended for professionals, or specific isolated populations, such as students from one particular school, were excluded, as well as websites with only video content, marketing content, daily caseload update or news dashboard pages with no health-related information.

**Results:** Of the 1275 identified websites, 321 (25%) were eligible for analysis. The overall EQIP, JAMA and DISCERN scores were 17.8, 2.7 and 38.0. Websites originated from 34 countries, with the majority from the USA (55%). News Services (50%) and Government/Health Departments (27%) were the most common sources of information and their information quality varied significantly. Majority of websites discuss prevention alone despite popular search trends of COVID-19 treatment. Websites discussing both treatment and prevention (n=73, 22%) score significantly higher across all tools (P<0.001).

**Conclusion:** This comprehensive assessment of online COVID-19 information using EQIP, JAMA and DISCERN tools indicate that most websites were inadequate. This necessitates improvements in online resources to facilitate public health measures during the pandemic.

### Strengths and Limitations of this study

- This study evaluated 321 websites, significantly improving our data coverage and representativeness over currently available studies.
- Top indexed websites from 12 different search terms were used, including both synonyms to COVID-19 and 'open' phrases, to capture the bulk of the available online resources.
- Quality of information on each website was evaluated using three validated tools, EQIP, DISCERN and JAMA, and were also evaluated by a second assessor to increase accuracy and minimise bias.
- The utility of each evaluation tool may be limited as they were not originally designed to assess online information during pandemics, however, their combinational use may offer enhanced accuracy and improved assessments as shown in other studies.
- The website database is obtained based on the popularity of different search terms on the Google Search Engine and, hence, results may be subject to change throughout the pandemic and serves as an indirect indicator for which websites the public uses.

view only



## Introduction

With the increasing popularity of the Internet, both the accessibility and availability of health information has increased drastically and is now a primary source of information for many.[1,2] It is known that health information-seeking behaviour also applies to the use of online resources and has become ever more important during the current Coronavirus disease 2019 (COVID-19) pandemic[3] Information on such widely-discussed topic will inevitably be produced in quantity and vary in production quality, potentially adversely affecting patient awareness and health-seeking behaviour.[4] Many of these resources read by the public may be unreliable or produced from non-peer-reviewed sources and affect behaviours such as recognition of symptoms, taking appropriate preventative precautions or seeking timely treatment.[3,5,6] Furthermore, inaccurate online information may contradict healthcare professionals and potentially compromise the trusting relationship with patients, worsening outcomes.[7]

Since the declaration of COVID-19 as a pandemic on 12th March 2020, its prevalence and mortality has continued to rise[8,9] and lead to the introduction of various measures such as social distancing, quarantine procedures and lockdown protocols.[10] As evidenced from previous outbreaks, effective public education and public health intervention relies on access to health information[11,12], which is now primarily delivered through the Internet. Many countries have since introduced lockdown and quarantine protocols as their mainstay preventative measures[13] but public health continues to be threatened by certain populations.[14] Due to both the novelty and rapid developments of COVID-19, there is a significant barrier for individuals to critically appraise online resources and, hence, necessitates a quantitative evaluation of the popular information sources available to the wider public.

Many instruments have been developed to evaluate patient information and may also be applied to online COVID-19 information.[15] The modified Ensuring Quality of Information for Patients (EQIP) tool is a reproducible modality used in previous studies to evaluate the reliability and quality of online patient information[16–18]. Previously, our group evaluated online information using the modified EQIP tool in a variety of conditions and procedures including bariatric surgery[19], Dupuytren's

1  
2  
3 disease[20], carpal tunnel disease[21], breast augmentation[22], liposuction[16] and liver  
4 transplantation[23]. Tools such as the Journal of American Medical Association (JAMA) benchmark  
5 and the DISCERN tool (no acronym) have also been used to evaluate online health information and  
6 their combinational use can provide a more comprehensive evaluation.[18,24] Given that the Internet  
7 has become an ever-important source of information and can determine health-seeking behaviour,  
8 which by extension can affect the progression of COVID-19. Hence, our study aims to assess the quality  
9 of information of top indexed websites that discuss information, prevention, or treatment of COVID-19  
10 using the modified EQIP tool, JAMA benchmark and DISCERN tool.  
11  
12  
13  
14  
15  
16  
17  
18  
19  
20  
21

## 22 **Methods**

### 23 **Eligibility criteria, information sources and data selection**

24  
25  
26 On 27<sup>th</sup> March 2020, 12 search terms and phrases were queried on the most used search engine,  
27 Google[25–27], to obtain a database of websites. Only Google was used as previous studies have shown  
28 that the use of multiple search engines will only provide duplicate results. To increase the number of  
29 results, more search terms were used: ‘Coronavirus’, ‘COVID 19’, ‘Stop getting Coronavirus’, ‘Corona  
30 Virus’, ‘How to treat coronavirus’, ‘Coronavirus safety tips’, ‘Drugs for coronavirus’, ‘What is self  
31 isolation coronavirus’, ‘China virus’, ‘Wuhan virus’, ‘Coronavirus Medicine’ and ‘COVID 19  
32 prevention’. These were commonly searched phrases identified using the ‘Google Adwords Keyword  
33 Planner’[28]. Only the first 100 websites were identified and recorded as previous work suggest patients  
34 tend to stay within the first 100 returned webpages[17,23]. Various search terms and their relative  
35 popularity were also collected directly from Google Trends[29] for further comparative analysis.  
36  
37  
38  
39  
40  
41  
42  
43  
44  
45  
46

47 All websites written in English language and providing information on prevention, treatment or  
48 management of COVID-19 intended for the general public or COVID-19 patients were considered  
49 eligible for inclusion. Any subsidiary pages or subdirectories of a website that contained information  
50 for the public and were easily accessible are also assessed. Websites or articles intended for  
51 professionals or specific population subsets, such as students alone, were excluded. Weblinks to purely  
52 video content, marketing content, daily caseload update or news dashboard pages with no educational  
53  
54  
55  
56  
57  
58  
59  
60

1  
2  
3 purposes were also excluded. The creation of the website database, eligibility assessment, website  
4 assessment and statistical analysis were performed within 4 weeks between March and April 2020.  
5  
6  
7  
8

### 9 **Website Scraping**

10 A website scraping tool was developed to identify and record the first 100 web links from Google. The  
11 tool utilises custom PHP to make HTTP requests to the search engine to mimic the requests made by  
12 the public. The queries were made from a server located in Texas, USA but no preferences were made  
13 to limit searches by geographical region. The tool makes repeated requests and logs the first 100 unique  
14 URLs. Duplicates were then removed from the database. A minority of websites were restricted by  
15 General Data Protection Regulation (GDPR) and were accessed through the use of virtual private  
16 networks (VPN) as any websites that could reasonably be accessed by the general public were included.  
17  
18  
19  
20  
21  
22  
23  
24  
25  
26  
27

### 28 **Data entry**

29 Six assessors, (SAG, KSF, KHF, LL, AS and DR), all of whom fluent in English, independently  
30 assessed the websites between 30 March and 13 April 2020. Evaluation included 36 EQIP items and  
31 four items on JAMA benchmark, all assessed through 'Yes, No or N/A' questions. DISCERN tool adds  
32 a further 16 items to assess reliability and quality of information on treatment using scales of 1 to 5.  
33 Assessors also recorded the country of origin, and type of source: Academic centre, Charity/Non-  
34 Governmental Organisation, Encyclopaedia, Government/Health Department, Hospital, Industry, News  
35 service, Patient group, Practitioner, and Professional Society. Qualitative information about  
36 preventative methods and treatment was also recorded. After the initial round of data entry, each website  
37 was evaluated by a second assessor between 14 April and 21 April and any contradictory results were  
38 resolved by consensus.  
39  
40  
41  
42  
43  
44  
45  
46  
47  
48  
49  
50  
51  
52  
53

### 54 **EQIP Tool**

55 The modified EQIP tool includes 36 criteria for a comprehensive assessment of patient information.  
56 This tool sets out to satisfy both the guidelines of British Medical Association (BMA)[30] and  
57 International Patient Decision Aids Standards (IPDAS) collaboration[31] on ideal information for  
58  
59  
60

1  
2  
3 patients and have been utilised in a variety of specialities previously.[16–18] 36 items across three  
4 domains were included: Content (items 1-18), Identification (items 19-24) and Structure (items 25-36).  
5  
6 Similar to previous uses, ‘Yes/No’ questions reduce assessor subjectivity in partial answers. ‘N/A’  
7  
8 option was also included if items were not relevant for the type of source. A cut-off point of 75<sup>th</sup>  
9  
10 percentile was set for EQIP score to discriminate between high-scoring from low-scoring websites as  
11  
12 was done in previous studies.  
13  
14  
15

### 16 17 18 **JAMA benchmark criteria**

19  
20 Critical appraisals of Internet-based resources are also assessed by the core standards identified by  
21  
22 JAMA in 1997.[32] This checklist was proposed by Silberg *et al.* to assist the appraisal and evaluation  
23  
24 of the credibility of unregulated Internet resources and have been used in various studies  
25  
26 previously[33,34]. This is evaluated by four items: Authorship, Attribution, Disclosure and Currency:  
27  
28 Authorship requires identification of authors, credentials and their affiliations; Attribution requires  
29  
30 appropriate citations on written information; Disclosure requires transparency of the website owner and  
31  
32 conflicts of interests; Currency requires a clear indication of the date of publication and updates.  
33  
34 Similarly, ‘Yes/No’ criterion is implemented to reduce the subjectivity of partial answers.  
35  
36  
37  
38

### 39 **DISCERN Tool**

40  
41 The DISCERN evaluation tool was first developed in 1998 at Oxford to judge the quality of information  
42  
43 regarding treatment choices.[35] This tool has been validated and used across various specialities to  
44  
45 assess treatment information.[33,36] This consisted of 16 items, of which the first 15 assesses the  
46  
47 reliability of and level of details provided on treatments and the last rates the overall quality of the  
48  
49 information. A score between 1 and 5 can be assigned to each item, with 1 being ‘No’, 3 being ‘Partial’  
50  
51 and 5 being ‘Yes’. To improve assessment accuracy, overall quality of information will be scored in  
52  
53 proportion to the mean scores calculated from the answers to items 1-15, with 1 being the lowest and 5  
54  
55 being the highest.  
56  
57  
58  
59

### 60 **Additional Items**

1  
2  
3 Additional items were included to further assess the websites, including whether a website discussed  
4 prevention methods, current treatments and the role of empirical evidence in the prevention or treatment  
5 for COVID-19. Data collected were in the form of 'Yes/No' to reduce ambiguity of partial answers  
6 again. Additionally, details provided by the website on these items were recorded if the item scores  
7 'Yes'. Websites were further analysed by whether their purpose is prevention, treatment, or both.  
8  
9  
10  
11  
12  
13  
14  
15

### 16 **Statistical Analysis**

17  
18 The dataset consisted of both continuous and categorical variables, which are reported as median and  
19 interquartile range (IQR) as well as numbers and percentages respectively. Scores above the 75<sup>th</sup>  
20 percentile are considered as high-scoring. Mann-Whitney and Kruskal-Wallis tests were used for  
21 analysis of continuous variables where appropriate. Fisher's or  $\chi^2$  tests were used to analyse proportions  
22 where appropriate. All P values were two-tailed and considered significant when  $P < 0.05$ . R version  
23 3.3.2 (R Core Team, GNU GPL v2 License), R Studio version 1.0.44 (RStudio, Inc. GNU Affero  
24 General Public License v3, Boston, MA, 2016) and their respective graphical user interface (GUI)  
25 rBiostatistics.com (rBiostatistics.com, London, Switzerland, 2017)[37] was used to perform the  
26 statistical analysis.  
27  
28  
29  
30  
31  
32  
33  
34  
35  
36  
37  
38

### 39 **Results**

#### 40 **Gathering of websites with information on COVID-19, its prevention and its management**

41  
42 A database of websites was gathered from the first 100 unique URLs returned using the 12 search terms.  
43 Additional hits on the last page of each search were also gathered if unique. The final dataset included  
44 1275 URLs. After filtering out duplicate results and websites that failed to meet our inclusion criteria,  
45 321 remained eligible for analysis. The workflow of dataset creation is shown in **Figure 1**. List of  
46 websites were obtained on a single day, 27<sup>th</sup> March 2020, and website evaluation was completed within  
47 two weeks.  
48  
49  
50  
51  
52  
53  
54  
55  
56  
57

#### 58 **Website demographics and search trends**

1  
2  
3 The most popular search terms were 'Coronavirus', followed by 'COVID' and 'Corona Virus', while  
4 search popularity peaked in mid- and late-March 2020 respectively. COVID-19-specific searches  
5 regarding treatment and masks were significantly more popular ( $P<0.001$ ) than prevention and peaked  
6 in mid-March and early-April respectively. **Figure 2** summarises the most popular search trends. The  
7 returned websites originated from 34 different countries (**Figure 3**): the USA produced the most  
8 websites ( $n=178$ ), followed by the United Kingdom ( $n=52$ ), Australia ( $n=18$ ) and Canada ( $n=18$ ). The  
9 source of information and website category is shown in **Table 1**. News Services were the most common  
10 source of information ( $n=163$ ), followed by Health Departments/Government ( $n=87$ ).

11  
12  
13  
14  
15  
16  
17  
18  
19  
20  
21  
22  
23  
24  
25  
26  
27  
28  
29  
30  
31  
32  
33  
34  
35  
36  
37  
38  
39  
40  
41  
42  
43  
44  
45  
46  
47  
48  
49  
50  
51  
52  
53  
54  
55  
56  
57  
58  
59  
60  
Forty-six websites (14.3%) described treatment methods alone, 202 websites (62.9%) mentioned  
treatment methods alone and 73 websites (22.7%) discussed both prevention and treatment. Of the  
mentioned prevention methods, 205 (63.9%) described social isolation, 169 (52.7%) physical  
distancing, 157 (48.9%) advised staying home and 136 (42.4%) described the benefits of disinfecting  
or cleaning surfaces. With regards to mentioned treatment methods, 55 (17.1%) described the use of  
antiviral medications, 31 (9.7%) described hydroxychloroquine or chloroquine and 26 (8.1%) described  
the use of non-steroidal anti-inflammatory drugs such as paracetamol and ibuprofen. Only 31 (9.7%)  
websites discussed the use of oxygen, ventilation or fluids as a possible treatment method.

### Overall performance

The mean Total score for EQIP, JAMA and DISCERN is 17.78, 2.69 and 38.00 respectively and their  
respective 75<sup>th</sup> percentile high-score cut-offs were 21, 4 and 43 (**Figure 4**). No website achieved the  
maximum score for EQIP Content (out of 18) or Structure (out of 6) domain but one website did attain  
maximum for EQIP Identification (out of 12). Seventy-four websites fulfilled all the JAMA criteria (out  
of 4). Four websites achieved the maximum for DISCERN Reliability (out of 40) but none scored fully  
in DISCERN Treatment (out of 40). 74 high-scoring websites were identified for EQIP and JAMA and  
76 for DISCERN tool. The mean scores for each tool and domain are as follows: EQIP Content (9.99  
vs 6.07;  $P<0.001$ ), EQIP Identification (4.03 vs 3.34;  $P<0.001$ ), EQIP Structure (8.45 vs 6.96;  $P<0.001$ ),  
Total EQIP (22.46 vs 16.37;  $P<0.001$ ), Total JAMA (4.00 vs 2.30;  $P<0.001$ ), DISCERN Reliability  
(31.72 vs 25.44;  $P<0.001$ ), DISCERN Treatment (13.49 vs 10.31;  $P=0.002$ ) and Total DISCERN (45.21  
vs 35.76;  $P<0.001$ ).

1  
2  
3 All tools and subsequent domains, except DISCERN Reliability and Total DISCERN scores, varied  
4 significantly between websites of different sources, notably with the Encyclopaedia (n=5) cohort  
5 holding the highest score for all domains. All tools and domains varied between website cohorts, with  
6 websites that include both Treatment and Prevention scoring above the mean values. **Table 2** and **Table**  
7  
8  
9  
10  
11 **3** summarises the variation of information quality with the source of information and website category  
12 respectively.  
13

### 14 15 16 **Subset analysis of Government/Health Department and News Services**

17  
18 Collectively, 250 (77.9%) of all web links were either Government/Health Departments and News  
19 Services websites, of which 121 (37.7%) were based in the USA. Globally, there is significant variation  
20 between Government/Health Departments and News Services in EQIP Content (mean 8.11 vs 6.22;  
21 P<0.001), Total EQIP (mean 18.90 vs 17.06; P<0.001), Total JAMA (mean 2.16 vs 2.98; P<0.001) and  
22 DISCERN Treatment (mean 9.02 vs 11.72; P=0.001). Variations in US websites were similar except  
23 for EQIP structure (P=0.148). The US-based cohort scored lower in Total EQIP than the global cohort  
24 but USA News Services specifically scored better in Total JAMA (3.17 vs 2.98) and Total DISCERN  
25 (39.25 vs 38.04). Breakdowns of comparison between the cohorts are shown in **Table 4**.  
26  
27  
28  
29  
30  
31  
32  
33

### 34 35 **High-scoring websites**

36  
37 Sixteen websites scored above 75<sup>th</sup> percentile across all three evaluation tools, 13 were from the USA,  
38 2 from the UK and 1 from Canada. Most were from News Services (n=10), followed by industry (n=4),  
39 Encyclopaedia (n=1) and Government/Health Departments (n=1). The 4 websites with the highest Total  
40 EQIP and Total DISCERN scores are shown in **Table 5** with their respective breakdowns.  
41  
42  
43  
44

### 45 46 **Discussion**

47  
48 Our search terms included various synonyms to COVID-19 to capture the bulk of the available material  
49 as well as 'open' search terms to capture websites that specifically intend to display prevention and  
50 treatment information. Our analysis identified that the overall quality of information was low across all  
51 assessment tools, as indicated by the low 75<sup>th</sup> percentile cut-offs for EQIP and DISCERN, at 21 and 43  
52 respectively, which are only at 58.3% and 53.8% of their respective full scores. Regarding EQIP,  
53 websites generally scored poorly, with a mean and median approximately 18 (IQR 15-20) out of a total  
54 of 36. Despite having less marks allocated for EQIP Structure, websites generally outperform the EQIP  
55  
56  
57  
58  
59  
60



1  
2  
3 Content domain (7.30 vs 6.97), indicating that while their information may not be of high quality, the  
4 design and the ease-of-use of these websites are adequate. However, as these websites can be easily  
5 used and navigated irrespective of background, it may present a potential pitfall where low-quality  
6 information can appear credible as user-friendly designs alone have been shown to improve information  
7 credibility.[38] The indicators assessing website referencing quality, such as JAMA benchmark and  
8 DISCERN Reliability, scored similarly, 2.69 (67.3% of maximum) and 26.93 (67.3% of maximum)  
9 respectively, but is lower in EQIP Identification domain 3.50 (58.3% of maximum), likely attributable  
10 to its additional assessment of whether there is patient involvement in the production of the material.

11  
12  
13  
14  
15  
16  
17  
18  
19  
20  
21  
22  
23  
24  
25  
26  
27  
28  
29  
30  
31  
32  
33  
34  
35  
36  
37  
38  
39  
40  
41  
42  
43  
44  
45  
46  
47  
48  
49  
50  
51  
52  
53  
54  
55  
56  
57  
58  
59  
60  
Most sources scored poorly due to several possible reasons. First and foremost, the lack of primary  
scientific research limits our knowledge on COVID, an emergent disease COVID only identified in  
early December 2019[39] and recognised as a pandemic in March 2020.[40] While research efforts  
have since gained traction and shifted to COVID, both the production of quality research and its  
subsequent peer-review process takes a considerable amount of time. This may limit the amount and  
speed of research output in comparison to the rapid progression of the COVID from local clusters to  
epidemic to pandemic. However, many journals have since implemented the fast-tracking of COVID  
research as well as making them freely accessible.[41–43] Similarly, efforts from Governments and  
Health Departments have also cooperated to help support and fast-track COVID studies in response to  
the growing pandemic.[44] Together, these efforts have facilitated the publication of COVID research  
where the WHO database alone has already indexed an excess of 5,000 articles.[45] However, it is also  
important to note the role of preprint servers on publications during the pandemic. Preprints are  
accessible to the public through various databases and while they have helped facilitate the peer-review  
process through improved accessibility, non-peer-reviewed articles can potentially be used, or cherry-  
picked, by non-professionals and cause potentially profound and unhelpful effects on public perception  
and awareness of COVID.[46–49]

Upon publication, research articles have to be reviewed and summarised by journalists who act as a  
bridge of information between scientists and the wider public. This often allows for efficient  
dissemination of critical research information to the public who often lack the scientific or medical  
background to be able to critically appraise and evaluate the latest developments. This is particularly



1  
2  
3 important as 52% (n=169) of all sources were classified as 'News Services'. As only 12 (7.4%) News  
4 Services website scored highly in all three tools respectively, it was clear that very few websites  
5 provided a comprehensive account of all current and relevant information on COVID, reflecting both  
6 the difficulty in matching the pace of rapid developments as well as the having the technical knowledge  
7 and expertise required to deliver concise and relevant information to readers. In such trying times, the  
8 health information-seeking behaviour of citizens will inevitably lead them to obtain information from  
9 news services[50] which can often be of variable quality.

10  
11 Previous studies have already identified that many health journalists lacked the knowledge and training  
12 required for accurate and reliable dissemination of health news and can have profound, or even harmful,  
13 impact on the health of readers.[51,52] This is reflected by the low scores across the various tools,  
14 indicating the overall inadequacy in both reliability and accuracy of these online resources. Potential  
15 causes and pitfalls in health journalism was highlighted by a survey of medical journalists in 37  
16 countries and revealed three most common constraints: the lack of time, space and knowledge, impairs  
17 their ability to deliver quality articles.[53] While their work stresses the ability to work quickly and  
18 summarise content concisely, many of the experienced journalists self-reported the lack of knowledge  
19 as a barrier. As they noted the importance of accumulating such knowledge throughout their career, the  
20 lack of expert knowledge in a rapidly progressing scientific field such as COVID can likely impact  
21 journalists' understanding and quality of conveyed information significantly. Furthermore, journalists  
22 reported difficulty in finding experts to explain scientific jargon, further limiting the information they  
23 produce. This potentially presents a large barrier towards disseminating quality COVID information as  
24 many countries and institutions have been re-directing their research efforts towards COVID, which in  
25 turn likely reduces the availability of experts to assist with medical journalism.[54,55] This is also  
26 demonstrated from one of the highest-scoring entries, an article whose author holds a PhD. in molecular  
27 genetics, which scored 22 in Total EQIP, 4 in JAMA and 74 in DISCERN.[56] When compared against  
28 the majority of the other sources, this underlines the importance of a relevant academic background in  
29 being able to disseminate novel scientific developments both reliably and accurately.

30  
31 Based on our analysis, Governments or health departments constitute another major source of  
32 information. We identified that the majority of these websites belonged to the local Governments of  
33  
34  
35  
36  
37  
38  
39  
40  
41  
42  
43  
44  
45  
46  
47  
48  
49  
50  
51  
52  
53  
54  
55  
56  
57  
58  
59  
60

1  
2  
3 various states in the USA, many of whom have based their information and advice on CDC. As both  
4 the nature and purpose of these information sources vary, they may be visited by different subsets of  
5 the population according to demographics and their information-seeking behaviour. A recent study has  
6 identified the importance of awareness and trust in information originating from the Government such  
7 as those of the Centers for Disease Control and Prevention (CDC), revealing that while up to 83.6% of  
8 American adults are aware of the CDC, only 64.6% of them report that they trust this source.[57]  
9 American adolescents were, however, less aware of the CDC (55.8%), but were more trusting of their  
10 information (72.2%). As previously established, the importance of trust in a government is a predictor  
11 of various health behaviours and outcomes such as use of health services and intention to vaccinate.[58–  
12 60] Similarly, as access and usage of online health information is known to vary between different  
13 demographic populations, it is paramount to create and provide targeted and effective educational  
14 material for public use.[61,62]

15  
16 A comparison between the global Government/Health Department against News Services websites  
17 revealed significant differences between EQIP Content, Total EQIP, Total and DISCERN Treatment.  
18 The EQIP Content scores likely reflect the differences in how new information is obtained as  
19 Government/Health Departments are directly involved in primary research, allowing more in-depth and  
20 accurate information dissemination compared to journalists who take on the role of secondary research.  
21 However, News Services scored higher in DISCERN Treatment and this may be due to the reluctance  
22 of the Government to prematurely disclose information on treatment at such an early stage of discovery,  
23 whereas journalists may be less limited by such constraints and willing to report the results of all  
24 potential studies. Interestingly, the majority of USA Government websites had some form of copy-  
25 pasted information from the Centre for Disease Control and Prevention (CDC), likely with the aim of  
26 maintaining consistency as well as to centralise their source of information. This contrasts with the  
27 majority of other sources where information may be re-written based on a variety of sources. However,  
28 while American sources display a similar pattern of variation, the EQIP Identification scores of  
29 Government/Health Departments had statistically significant differences and also scored lower than  
30 News Services (mean 3.34 vs 3.78;  $P=0.011$ ). This verbatim use of CDC information may have  
31 neglected the importance of clarity and transparency in displaying the source of information as these  
32  
33  
34  
35  
36  
37  
38  
39  
40  
41  
42  
43  
44  
45  
46  
47  
48  
49  
50  
51  
52  
53  
54  
55  
56  
57  
58  
59  
60

1  
2  
3 Government websites primarily serve to disseminate information instead of justifying or providing a  
4 critical appraisal of available literature.  
5

6  
7 Google Trends also identified that search popularity of treatment has increased rapidly and outgrown  
8 prevention searches since early-March. The increased interests suggest that the demand for preventative  
9 measures may have been sufficiently met and that the public interests may be shifting towards treatment  
10 methods. However, while 275 (85%) websites addressed prevention methods to some degree, the cohort  
11 scored below the mean Total EQIP score (17.12 vs 17.78;  $P<0.001$ ), Total JAMA score (2.53 vs 2.69;  
12  $P=0.001$ ) and Total DISCERN score (34.64 vs 38.00;  $P<0.001$ ). This suggests that while numerous, the  
13 quality of websites that focus on preventative methods remain subpar across all quality indicators.  
14 Similarly, of the 46% of websites that focussed on treatment alone, they scored below the mean in Total  
15 EQIP score (16.89 vs 17.78;  $P<0.001$ ) despite scoring the highest in EQIP Identification domain (3.87  
16 vs 3.50;  $P<0.001$ ), suggesting that treatment websites tend to be better referenced and adept at sourcing  
17 evidence. This is also reflected by its above-average JAMA score (3.13 vs 2.69;  $P=0.001$ ) and Total  
18 DISCERN (45.07 vs 38.00;  $P<0.001$ ) scores. Contrarily, the 73 websites that discussed both treatment  
19 and prevention of COVID-19 consistently scored higher than the mean across all indicators, Total EQIP  
20 (20.15 vs 17.78;  $P<0.001$ ), Total JAMA (2.85 vs 2.69;  $P=0.001$ ) and Total DISCERN (42.84 vs 38.00;  
21  $P<0.001$ ). As these are websites that explore multiple aspects of the virus, its production likely requires  
22 processing information from multiple sources. This likely necessitates better understanding on the  
23 writer's behalf, leading to both the production of substantially higher quality articles as well as the  
24 tendency to reference its numerous resources clearly and appropriately. It is nonetheless important to  
25 maintain and improve the quality of such online resources in order to combat the increasingly dangerous  
26 COVID-19 myths, of which one of the latest suggests injection of disinfectants as treatment.[63,64]

27  
28 Similar to the tools used in this study, the Minervation validation instrument (LIDA)[65], Flesch  
29 Reading Ease (FRE) Score and the Flesch-Kincaid Grade (FKG) have also been used to evaluate the  
30 quality of online health information.[66] However, LIDA was not considered as an appropriate  
31 assessment tool here as it does not provide a quantitative or qualitative assessment of either benefits or  
32 risks to interventions. Additionally, the majority of its items in 'Accessibility' and 'Usability' sections  
33 assess the design and ease-of-access of a website which is already adequately covered by the modified  
34  
35  
36  
37  
38  
39  
40  
41  
42  
43  
44  
45  
46  
47  
48  
49  
50  
51  
52  
53  
54  
55  
56  
57  
58  
59  
60

1  
2  
3 EQIP tool. Similarly, the use of FRE and FKG only provides an assessment of total sentences, words  
4 and syllables and does not evaluate the content itself.[67]  
5

6  
7 This study has several limitations. Only the most popular search engine, 'Google', was used and may  
8 not be reflective of those who use other search engines. The searches may also be affected by the  
9 geographical location of the requesting computer, which means results could still be centred around a  
10 particular continent despite disabling the geolocation features. Similarly, the search terms were obtained  
11 using 'Google Adwords Keyword Planner' and 'Google Trends', which provided commonly searched  
12 phrases but may not be truly indicative of search patterns of the wider public when seeking for COVID-  
13 related information. Hence, we opted to use 12 different search terms, containing both variations of  
14 'COVID-19' names as well as different phrases that patients may search for. Another limitation is the  
15 exclusion of non-English language websites, which reduces the representativeness of all the available  
16 information, especially given the international nature of the pandemic. A minority of URLs, particularly  
17 of News Services, updated their content regularly or modified to redirect visitors, which may affect the  
18 second round of evaluation and subsequent statistical analysis. Additionally, as modified EQIP tool,  
19 JAMA benchmark and DISCERN tool were not originally designed for the specific purpose of assessing  
20 the highly variable information produced during pandemics, it may be considered as a limitation.  
21 However, the EQIP tool was designed to assess any type of patient information and demonstrated high  
22 inter-rater reliability.[16] Similarly, JAMA benchmark was designed to evaluate website reliability  
23 alone and DISCERN examines both reliability and content accuracy, thus, the combinational use of  
24 tools enhances the accuracy and objective assessment of websites. Finally, the extracted websites were  
25 limited temporally as the results might no longer be representative of online information at time of  
26 publication due to the fast-paced developments of COVID as many websites found during our search  
27 in March 2020 may inevitably be updated or removed since our search.  
28  
29  
30  
31  
32  
33  
34  
35  
36  
37  
38  
39  
40  
41  
42  
43  
44  
45  
46  
47  
48  
49  
50

## 51 52 53 **Conclusion**

54 In short, the abundance of Internet resources providing COVID-19 information is exemplified by the  
55 numerous identified websites during our search. The information available to the public may affect their  
56 health decisions, which, subsequently, affects the efficacy and outcome of public health measures  
57  
58  
59  
60

1  
2  
3 implemented by the state. As effective treatments and vaccines research are underway, COVID-19 is  
4 primarily addressed with preventative measures, hence necessitating a critical review of the quality and  
5 nature of information accessible to the public. Our results demonstrated that the websites were chiefly  
6 produced by News Services and Government/Health Departments but were nonetheless of low quality.  
7 While the majority of websites addressed prevention, and likely met the information needs of the public  
8 as reflected by search trends, there is a relative deficit in websites that discuss treatment methods. A  
9 minority of websites discussed both prevention methods and treatment and were generally good  
10 resources but the majority websites were of inadequate quality. Thus, there is a need for higher quality  
11 for online COVID-19 resources to facilitate public education and enable better cooperation and  
12 outcomes of public health measures.  
13  
14  
15  
16  
17  
18  
19  
20  
21  
22  
23  
24  
25  
26  
27  
28  
29  
30  
31  
32  
33  
34  
35  
36  
37  
38  
39  
40  
41  
42  
43  
44  
45  
46  
47  
48  
49  
50  
51  
52  
53  
54  
55  
56  
57  
58  
59  
60

## Bibliography

- 1 Clarke MA, Moore JL, Steege LM, *et al.* Health information needs, sources, and barriers of  
2 primary care patients to achieve patient-centered care: A literature review. *Health Informatics*  
3 *J* 2016;**22**:992–1016. doi:10.1177/1460458215602939
- 4 Tan SS-L, Goonawardene N. Internet Health Information Seeking and the Patient-Physician  
5 Relationship: A Systematic Review. *J Med Internet Res* 2017;**19**. doi:10.2196/jmir.5729
- 6 Semigran HL, Linder JA, Gidengil C, *et al.* Evaluation of symptom checkers for self diagnosis  
7 and triage: audit study. *BMJ* 2015;**351**:h3480–h3480. doi:10.1136/bmj.h3480
- 8 Alduraywish SA, Altamimi LA, Aldhuwayhi RA, *et al.* Sources of Health Information and  
9 Their Impacts on Medical Knowledge Perception Among the Saudi Arabian Population:  
10 Cross-Sectional Study. *J Med Internet Res* 2020;**22**. doi:10.2196/14414
- 11 Vogel L. Viral misinformation threatens public health. *Can Med Assoc J* 2017;**189**:E1567–  
12 E1567. doi:10.1503/cmaj.109-5536
- 13 British Medical Journal. Health information on internet is often unreliable. *BMJ Br Med J*  
14 2000;**321**:136.
- 15 Silver MP. Patient perspectives on online health information and communication with doctors:  
16 a qualitative study of patients 50 years old and over. *J Med Internet Res* 2015;**17**:e19–e19.  
17 doi:10.2196/jmir.3588
- 18 World Health Organization. Coronavirus disease 2019.  
19 <https://www.who.int/emergencies/diseases/novel-coronavirus-2019> (accessed 30 Apr 2020).
- 20 World Health Organization. WHO announces COVID-19 outbreak a pandemic.  
21 2020.<http://www.euro.who.int/en/health-topics/health-emergencies/coronavirus-covid-19/news/news/2020/3/who-announces-covid-19-outbreak-a-pandemic> (accessed 30 Apr 2020).
- 22 World Health Organization. COVID-19 Strategy Update. 2020.  
23 [https://www.who.int/docs/default-source/coronaviruse/covid-strategy-update-14april2020.pdf?sfvrsn=29da3ba0\\_19](https://www.who.int/docs/default-source/coronaviruse/covid-strategy-update-14april2020.pdf?sfvrsn=29da3ba0_19) (accessed 30 Apr 2020).
- 24 Feldmann H. Ebola — A Growing Threat? *N Engl J Med* 2014;**371**:1375–8.  
25 doi:10.1056/NEJMp1405314

- 1  
2  
3 12 Odium M, Yoon S. Health Information Needs and Health Seeking Behavior During the 2014-  
4 2016 Ebola Outbreak: A Twitter Content Analysis. *PLoS Curr* 2018;**10**.  
5 doi:10.1371/currents.outbreaks.fa814fb2bec36e29b718ab6af66124fa  
6  
7  
8  
9 13 Gilbert D. Which countries are under lockdown - and is it working?  
10  
11 2020. <https://www.telegraph.co.uk/news/2020/04/16/countries-in-lockdown-denmark-germany/>  
12 (accessed 30 Apr 2020).  
13  
14  
15 14 British Broadcasting Company. Coronavirus lockdown protest: What's behind the US  
16 demonstrations? - BBC News. 2020. <https://www.bbc.co.uk/news/world-us-canada-52359100>  
17 (accessed 30 Apr 2020).  
18  
19  
20  
21 15 Elwyn G, O'Connor A, Stacey D, *et al*. Developing a quality criteria framework for patient  
22 decision aids: online international Delphi consensus process. *Bmj-British Med J*  
23 2006;**333**:417–9. doi:10.1136/bmj.38926.629329.AE  
24  
25  
26  
27 16 Zuk G, Palma AF, Eylert G, *et al*. Systematic Review of Quality of Patient Information on  
28 Liposuction in the Internet. *Plast Reconstr Surgery-Global Open* 2016;**4**.  
29 doi:10.1097/gox.0000000000000798  
30  
31  
32  
33 17 Raptis DA, Sinanyan M, Ghani S, *et al*. Quality assessment of patient information on the  
34 management of gallstone disease in the internet – A systematic analysis using the modified  
35 ensuring quality information for patients tool. *HPB* 2019;**21**:1632–40.  
36 doi:10.1016/j.hpb.2019.03.355  
37  
38  
39  
40  
41  
42 18 McCool ME, Wahl J, Schlecht I, *et al*. Evaluating written patient information for eczema in  
43 German: Comparing the reliability of two instruments, DISCERN and EQIP. *PLoS One*  
44 2015;**10**. doi:10.1371/journal.pone.0139895  
45  
46  
47  
48 19 Vetter D, Ruhwinkel H, Raptis DA, *et al*. Quality Assessment of Information on Bariatric  
49 Surgery Websites. *Obes Surg* 2018;:1–8.  
50  
51  
52  
53 20 Zuk G, Reinisch KB, Raptis DA, *et al*. Dupuytren Disease: Is There Enough Comprehensive  
54 Patient Information on the Internet? *Interact J Med Res* 2017;**6**:e7. doi:10.2196/ijmr.7822  
55  
56  
57  
58 21 Frueh FS, Palma AF, Raptis DA, *et al*. Carpal tunnel syndrome: Analysis of online patient  
59 information with the EQIP tool. *Chir Main* 2015;**34**:113–21. doi:10.1016/j.main.2015.04.003  
60



- 1  
2  
3 22 Palma AF, Zuk G, Raptis DA, *et al.* Quality of information for women seeking breast  
4 augmentation in the Internet. *J Plast Surg Hand Surg* 2016;**50**:262–71.  
5  
6  
7 doi:10.3109/2000656X.2016.1154469  
8
- 9 23 Melloul E, Raptis DA, Oberkofler CE, *et al.* Donor information for living donor liver  
10 transplantation: Where can comprehensive information be found? *Liver Transplant*  
11  
12 2012;**18**:892–900. doi:10.1002/lt.23442  
13  
14  
15 24 Corcelles R, Daigle CR, Talamas HR, *et al.* Assessment of the quality of Internet information  
16 on sleeve gastrectomy. *Surg Obes Relat Dis* 2015;**11**:539–44. doi:10.1016/j.soard.2014.08.014  
17  
18  
19 25 The eBusiness. Top 15 Best Search Engines | February 2020.  
20  
21  
22 <http://www.ebizmba.com/articles/search-engines> (accessed 30 Apr 2020).  
23  
24 26 Search Engine Watch. Google Hits the Billion Monthly Unique Visitors Mark.  
25  
26 2011;**2020**.[https://www.searchenginewatch.com/2011/06/23/google-hits-the-billion-monthly-](https://www.searchenginewatch.com/2011/06/23/google-hits-the-billion-monthly-unique-visitors-mark/)  
27  
28 [unique-visitors-mark/](https://www.searchenginewatch.com/2011/06/23/google-hits-the-billion-monthly-unique-visitors-mark/)  
29  
30 27 Google. <https://www.google.com/> (accessed 30 Apr 2020).  
31  
32 28 Google. Google Ads - Get More Customers With Easy Online Advertising.  
33  
34 [https://ads.google.com/intl/en\\_GB/home/](https://ads.google.com/intl/en_GB/home/) (accessed 30 Apr 2020).  
35  
36 29 Google. Google Trends. <https://trends.google.com/trends>  
37  
38 30 British Medical Association. BMA Patient Information Awards, .  
39  
40 2018;**2018**.<https://www.bma.org.uk/library/patient-information-awards>  
41  
42  
43 31 International Patient Decision Aid Standards Collaboration. IPDAS Collaboration Background  
44  
45 Document. 2005;**2018**.[http://ipdas.ohri.ca/IPDAS\\_Background.pdf](http://ipdas.ohri.ca/IPDAS_Background.pdf)  
46  
47 32 Silberg WM, Lundberg GD, Musacchio RA. Assessing, controlling, and assuring the quality of  
48  
49 medical information on the Internet: Caveant lector et viewer—Let the reader and viewer  
50  
51 beware. *JAMA* 1997;**277**:1244–5.  
52  
53 33 Janssen S, Fahlbusch FB, Kaesmann L, *et al.* Radiotherapy for prostate cancer: DISCERN  
54  
55 quality assessment of patient-oriented websites in 2018. *Bmc Urol* 2019;**19**.  
56  
57  
58 doi:10.1186/s12894-019-0474-4  
59  
60 34 Borgmann H, Wölm J-H, Vallo S, *et al.* Prostate Cancer on the Web—Expedient Tool for



- 1  
2  
3 Patients' Decision-Making? *J Cancer Educ* 2017;**32**:135–40.  
4  
5 35 Charnock D, Shepperd S, Needham G, *et al.* DISCERN: an instrument for judging the quality  
6 of written consumer health information on treatment choices. *J Epidemiol Community Heal*  
7 1999;**53**:105–11.  
8  
9  
10  
11 36 Nghiem AZ, Mahmoud Y, Som R. Evaluating the quality of internet information for breast  
12 cancer. *Breast* 2016;**25**:34–7. doi:10.1016/j.breast.2015.10.001  
13  
14  
15 37 Raptis DA. rBiostatistics.com (alpha version) | rBiostatistics.com.  
16 <https://www.rbiostatistics.com/> (accessed 30 Apr 2020).  
17  
18  
19 38 Sbaffi L, Rowley J. Trust and Credibility in Web-Based Health Information: A Review and  
20 Agenda for Future Research. *J Med Internet Res* 2017;**19**. doi:10.2196/jmir.7579  
21  
22  
23 39 World Health Organization. WHO | Novel Coronavirus – China.  
24 2020.<https://www.who.int/csr/don/12-january-2020-novel-coronavirus-china/en/> (accessed 30  
25 Apr 2020).  
26  
27  
28  
29 40 World Health Organization. Statement on the second meeting of the International Health  
30 Regulations (2005) Emergency Committee regarding the outbreak of novel coronavirus (2019-  
31 nCoV). 2020.[https://www.who.int/news-room/detail/30-01-2020-statement-on-the-second-  
32 meeting-of-the-international-health-regulations-\(2005\)-emergency-committee-regarding-the-  
33 outbreak-of-novel-coronavirus-\(2019-ncov\)](https://www.who.int/news-room/detail/30-01-2020-statement-on-the-second-meeting-of-the-international-health-regulations-(2005)-emergency-committee-regarding-the-outbreak-of-novel-coronavirus-(2019-ncov)) (accessed 30 Apr 2020).  
34  
35  
36 41 COVID-19 Updates. <https://plos.org/covid-19/> (accessed 30 Apr 2020).  
37  
38  
39 42 Elsevier. COVID-19 Update - Elsevier. [https://www.journals.elsevier.com/journal-of-critical-  
40 care/covid-19](https://www.journals.elsevier.com/journal-of-critical-care/covid-19) (accessed 30 Apr 2020).  
41  
42  
43 43 Anesthesia & Analgesia. Call for Papers: Coronavirus Disease 2019 (COVID-19).  
44 <https://journals.lww.com/anesthesia-analgesia/Pages/CFPCOVID19.aspx> (accessed 30 Apr  
45 2020).  
46  
47  
48 44 National Health Service Health Research Authority. COVID-19 research - Health Research  
49 Authority. <https://www.hra.nhs.uk/covid-19-research/> (accessed 30 Apr 2020).  
50  
51  
52 45 World Health Organization. COVID-19: Global literature on coronavirus disease.  
53 <https://search.bvsalud.org/global-literature-on-novel-coronavirus-2019-ncov/> (accessed 30 Apr  
54  
55  
56  
57  
58  
59  
60

- 2020).
- 46 Majumder MS, Mandl KD. Early in the epidemic: impact of preprints on global discourse about COVID-19 transmissibility. *Lancet Glob Heal* 2020.
- 47 Pradhan P, Pandey AK, Mishra A, *et al*. Uncanny similarity of unique inserts in the 2019-nCoV spike protein to HIV-1 gp120 and Gag. *BioRxiv* 2020.
- 48 Liu DWC. Science Denial and the Science Classroom. *Cbe-Life Sci Educ* 2012;**11**:129–34. doi:10.1187/cbe.12-03-0029
- 49 Altmetric – Uncanny similarity of unique inserts in the 2019-nCoV spike protein to HIV-1 gp120 and Gag. <https://www.altmetric.com/details/74957328> (accessed 30 Apr 2020).
- 50 Longo DR. Understanding health information, communication, and information seeking of patients and consumers: a comprehensive and integrated model. *Heal Expect* 2005;**8**:189–94.
- 51 Keshvari M, Yamani N, Adibi P, *et al*. Health journalism: Health reporting status and challenges. *Iran J Nurs Midwifery Res* 2018;**23**:14.
- 52 Schwitzer G. How do US journalists cover treatments, tests, products, and procedures? An evaluation of 500 stories. *PLoS Med* 2008;**5**.
- 53 Larsson A, Oxman AD, Carling C, *et al*. Medical messages in the media—barriers and solutions to improving medical journalism. *Heal Expect* 2003;**6**:323–31.
- 54 Cattani M. Global coalition to accelerate COVID-19 clinical research in resource-limited settings. *Lancet* 2020.
- 55 ST. George’s University of London. 3 April: 2020 Covid-19 response — our role in tackling the pandemic. <https://www.sgul.ac.uk/news/alerts/bulletins/3-april-2020> (accessed 30 Apr 2020).
- 56 Saey Tina Hesman. Repurposed drugs may help scientists fight the new coronavirus. 2020. doi:10.1101/2020.01.28.922922V2
- 57 Kowitt SD, Schmidt AM, Hannan A, *et al*. Awareness and trust of the FDA and CDC: Results from a national sample of US adults and adolescents. *PLoS One* 2017;**12**.
- 58 Bish A, Yardley L, Nicoll A, *et al*. Factors associated with uptake of vaccination against pandemic influenza: a systematic review. *Vaccine* 2011;**29**:6472–84.

- 1  
2  
3 59 Whetten K, Leserman J, Whetten R, *et al.* Exploring lack of trust in care providers and the  
4 government as a barrier to health service use. *Am J Public Health* 2006;**96**:716–21.  
5  
6  
7 60 Quinn SC, Parmer J, Freimuth VS, *et al.* Exploring communication, trust in government, and  
8 vaccination intention later in the 2009 H1N1 pandemic: results of a national survey.  
9  
10  
11 *Biosecurity bioterrorism biodefense Strateg Pract Sci* 2013;**11**:96–106.  
12  
13 61 Sadah SA, Shahbazi M, Wiley MT, *et al.* Demographic-based content analysis of web-based  
14 health-related social media. *J Med Internet Res* 2016;**18**:e148.  
15  
16 62 Sadah SA, Shahbazi M, Wiley MT, *et al.* A study of the demographics of web-based health-  
17 related social media users. *J Med Internet Res* 2015;**17**:e194.  
18  
19  
20 63 World Health Organization. Myth busters. [https://www.who.int/emergencies/diseases/novel-](https://www.who.int/emergencies/diseases/novel-coronavirus-2019/advice-for-public/myth-busters)  
21 coronavirus-2019/advice-for-public/myth-busters (accessed 30 Apr 2020).  
22  
23 64 Smith D. Coronavirus: medical experts denounce Trump’s theory of ‘disinfectant injection’ |  
24 World news | The Guardian. 2020.[https://www.theguardian.com/world/2020/apr/23/trump-](https://www.theguardian.com/world/2020/apr/23/trump-coronavirus-treatment-disinfectant)  
25 coronavirus-treatment-disinfectant (accessed 30 Apr 2020).  
26  
27 65 Minervation. The LIDA Instrument Minervation validation instrument for health care web  
28 sites Full Version (1.2) containing instructions. 2007. [www.minervation.com/validation](http://www.minervation.com/validation)  
29 (accessed 30 Apr 2020).  
30  
31 66 Coughler C, M Burke S, Cardy JO. Analysis of the quality of online resources for parents of  
32 children who are late to talk. *Autism Dev Lang Impair* 2020;**5**:239694152091794.  
33  
34 doi:10.1177/2396941520917940  
35  
36 67 Kher A, Johnson S, Griffith R. Readability assessment of online patient education material on  
37 congestive heart failure. *Adv Prev Med* 2017;**2017**.  
38  
39  
40  
41  
42  
43  
44  
45  
46  
47  
48  
49  
50  
51  
52  
53  
54  
55  
56  
57  
58  
59  
60

**Table 1.** Website demographic and background information

| Type                         | Total (n,%)  | Treatment (n,%) | Prevention (n,%) | Treatment and Prevention (n,%) |
|------------------------------|--------------|-----------------|------------------|--------------------------------|
| Academic Centre              | 10 (3.12%)   | 1 (0.31%)       | 4 (1.25%)        | 5 (1.56%)                      |
| Charity/NGO                  | 12 (3.74%)   | 1 (0.31%)       | 9 (2.8%)         | 2 (0.62%)                      |
| Encyclopaedia                | 5 (1.56%)    | 0 (0%)          | 1 (0.31%)        | 4 (1.25%)                      |
| Government/Health Department | 87 (27.10%)  | 1 (0.31%)       | 65 (20.25%)      | 21 (6.54%)                     |
| Hospital                     | 7 (2.18%)    | 0 (0%)          | 5 (1.56%)        | 2 (0.62%)                      |
| Industry                     | 30 (9.35%)   | 8 (2.49%)       | 10 (3.12%)       | 12 (3.74%)                     |
| Military                     | 1 (0.31%)    | 0 (0%)          | 1 (0.31%)        | 0 (0%)                         |
| News Service                 | 163 (50.78%) | 34 (10.59%)     | 102 (31.78%)     | 27 (8.41%)                     |
| Patient group                | 1 (0.10%)    | 1 (0.31%)       | 0 (0%)           | 0 (0%)                         |
| Professional society         | 4 (1.25%)    | 0 (0%)          | 4 (1.25%)        | 0 (0%)                         |
| Research Centre              | 1 (0.31%)    | 0 (0%)          | 1 (0.31%)        | 0 (0%)                         |
| Total                        | 321          | 46 (14.33%)     | 202 (62.93%)     | 73 (22.74%)                    |

**Table 2.** Overall quality of information of all sources of information

| Indicator/<br>(Mean,<br>SD) | Academic<br>centre | Charity/N<br>GO | Encyclopa<br>edia | Governme<br>nt/Health<br>Departmen<br>t | Hospital    | Industry    | Military | News<br>Service | Patient<br>group | Profession<br>al society | Research<br>Centre | P Value |
|-----------------------------|--------------------|-----------------|-------------------|-----------------------------------------|-------------|-------------|----------|-----------------|------------------|--------------------------|--------------------|---------|
| EQIP<br>Content             | 7.70 (2.50)        | 6.75 (3.33)     | 10.80<br>(3.11)   | 8.11 (2.49)                             | 7.14 (2.19) | 7.13 (2.60) | 5.00 (0) | 6.22 (2.11)     | 10.00 (0)        | 5.50 (3)                 | 5.00 (0)           | <0.001  |

|                     |               |              |              |              |              |               |           |               |           |             |           |        |
|---------------------|---------------|--------------|--------------|--------------|--------------|---------------|-----------|---------------|-----------|-------------|-----------|--------|
| EQIP Identification | 2.90 (1.20)   | 3.08 (0.90)  | 4.80 (0.45)  | 3.44 (1.03)  | 2.71 (1.38)  | 3.4 (1.13)    | 1.00 (0)  | 3.62 (0.73)   | 3.00 (0)  | 4.00 (0)    | 4.00 (0)  | 0.003  |
| EQIP Structure      | 7.90 (1.85)   | 7.67 (1.30)  | 8.60 (1.67)  | 7.34 (1.45)  | 7.43 (0.98)  | 6.97 (1.83)   | 9.00 (0)  | 7.22 (1.39)   | 10.00 (0) | 7.25 (0.5)  | 5.00 (0)  | 0.08   |
| EQIP Total          | 18.50 (3.66)  | 17.50 (4.32) | 24.20 (3.56) | 18.9 (3.79)  | 17.29 (3.50) | 17.5 (4.48)   | 15.00 (0) | 17.06 (3.19)  | 23.00 (0) | 16.75 (3.4) | 14.00 (0) | <0.001 |
| JAMA Total          | 2.50 (0.97)   | 2.50 (1.00)  | 3.40 (0.55)  | 2.16 (0.86)  | 2.14 (1.57)  | 2.73 (1.23)   | 1.00 (0)  | 2.98 (0.85)   | 3.00 (0)  | 3.50 (0.58) | 3.00 (0)  | <0.001 |
| DISCERN Reliability | 27.20 (6.78)  | 26.25 (6.51) | 35.60 (4.77) | 27.47 (5.96) | 29.86 (5.58) | 26.6 (7.46)   | 23.00 (0) | 26.31 (6.3)   | 27.00 (0) | 29.50 (4.2) | 26.00 (0) | 0.128  |
| DISCERN Treatment   | 13.00 (6.70)  | 9.42 (2.39)  | 16.00 (9.30) | 9.02 (3.14)  | 8.71 (1.89)  | 13.33 (6.39)  | 8.00 (0)  | 11.72 (6.22)  | 13.00 (0) | 8.50 (1)    | 17.00 (0) | 0.001  |
| DISCERN Total       | 40.20 (10.38) | 35.67 (7.67) | 51.60 (12.3) | 36.49 (7.50) | 38.57 (5.47) | 39.93 (10.45) | 31.00 (0) | 38.04 (10.44) | 40.00 (0) | 38.00 (5.1) | 43.00 (0) | 0.167  |

Table 3. Overall quality of information of all websites subsets

| Indicator/(Mean, SD) | Overall     | Treatment   | Prevention  | Treatment and Prevention | P Value |
|----------------------|-------------|-------------|-------------|--------------------------|---------|
| EQIP Content         | 6.97 (2.52) | 6.26 (1.81) | 6.55 (2.30) | 8.58 (2.84)              | <0.001  |

|                     |              |               |              |               |        |
|---------------------|--------------|---------------|--------------|---------------|--------|
| EQIP Identification | 3.50 (0.93)  | 3.87 (0.72)   | 3.32 (0.97)  | 3.78 (0.80)   | <0.001 |
| EQIP Structure      | 7.30 (1.47)  | 6.76 (1.46)   | 7.25 (1.46)  | 7.79 (1.37)   | <0.001 |
| EQIP Total          | 17.78 (3.71) | 16.89 (2.84)  | 17.12 (3.45) | 20.15 (3.95)  | <0.001 |
| JAMA Total          | 2.69 (0.98)  | 3.13 (0.72)   | 2.53 (1.05)  | 2.85 (0.84)   | 0.001  |
| DISCERN Reliability | 26.93 (6.35) | 26.98 (6.92)  | 26.04 (5.72) | 29.37 (7.04)  | <0.001 |
| DISCERN Treatment   | 11.07 (5.60) | 18.09 (6.04)  | 8.60 (2.45)  | 13.47 (6.73)  | <0.001 |
| DISCERN Total       | 38.00 (9.61) | 45.07 (11.67) | 34.64 (6.52) | 42.84 (10.93) | <0.001 |

**Table 4.** Comparison between Government and News Services

| Indicator | Global (USA inclusive) (n=250) |                      |                 |                |         | USA (n=121)           |                      |                 |                |         |
|-----------|--------------------------------|----------------------|-----------------|----------------|---------|-----------------------|----------------------|-----------------|----------------|---------|
|           | Government Mean Score          | Government Mean Rank | News Mean Score | News Mean Rank | P Value | Government Mean Score | Government Mean Rank | News Mean Score | News Mean Rank | P Value |
|           |                                |                      |                 |                |         |                       |                      |                 |                |         |

|                     |       |        |       |        |        |       |       |       |       |        |
|---------------------|-------|--------|-------|--------|--------|-------|-------|-------|-------|--------|
| EQIP Content        | 8.11  | 161.34 | 6.22  | 106.37 | <0.001 | 7.66  | 75.80 | 6.17  | 54.22 | 0.002  |
| EQIP Identification | 3.44  | 118.28 | 3.62  | 129.35 | 0.207  | 3.34  | 50.29 | 3.78  | 65.90 | 0.011  |
| EQIP Structure      | 7.34  | 129.90 | 7.22  | 123.15 | 0.464  | 7.55  | 67.54 | 7.08  | 58.01 | 0.148  |
| EQIP Total          | 18.90 | 151.52 | 17.06 | 111.61 | <0.001 | 18.55 | 71.21 | 17.04 | 56.33 | 0.029  |
| JAMA Total          | 2.16  | 85.72  | 2.98  | 146.73 | <0.001 | 2.03  | 34.28 | 3.17  | 73.23 | <0.001 |
| DISCERN Reliability | 27.47 | 137.15 | 26.31 | 119.28 | 0.062  | 26.53 | 60.26 | 26.66 | 61.34 | 0.876  |
| DISCERN Treatment   | 9.02  | 110.95 | 11.72 | 133.27 | 0.001  | 8.84  | 47.99 | 12.59 | 66.96 | 0.001  |
| DISCERN Total       | 36.49 | 105.32 | 38.04 | 136.27 | 0.963  | 35.37 | 54.72 | 39.25 | 63.87 | 0.182  |

Table 5. Websites with the highest EQIP and DISCERN scores

| URL                                                                                                                                                                                                                               | Country | Treatment<br>Prevention | or | Total EQIP | Total JAMA | Total DISCERN |
|-----------------------------------------------------------------------------------------------------------------------------------------------------------------------------------------------------------------------------------|---------|-------------------------|----|------------|------------|---------------|
| <a href="https://www.cnet.com/how-to/coronavirus-explained-all-your-questions-about-covid-19-answered/">https://www.cnet.com/how-to/coronavirus-explained-all-your-questions-about-covid-19-answered/</a>                         | USA     | Both                    |    | 27         | 4          | 52            |
| <a href="https://www.wikihow.com/Prevent-Coronavirus">https://www.wikihow.com/Prevent-Coronavirus</a>                                                                                                                             | USA     | Prevention              |    | 27         | 4          | 46            |
| <a href="https://www.sciencenews.org/article/coronavirus-covid19-repurposed-treatments-drugs">https://www.sciencenews.org/article/coronavirus-covid19-repurposed-treatments-drugs</a>                                             | USA     | Treatment               |    | 22         | 4          | 75            |
| <a href="https://www.vox.com/science-and-health/2020/3/4/21154590/coronavirus-vaccine-treatment-covid-19-drug-cure">https://www.vox.com/science-and-health/2020/3/4/21154590/coronavirus-vaccine-treatment-covid-19-drug-cure</a> | USA     | Both                    |    | 22         | 4          | 74            |

**Figure 4.** Scores of all websites for EQIP tool, JAMA benchmark and DISCERN tool, with scores above 75<sup>th</sup> percentile marked as high



1  
2  
3  
4  
5  
6  
7  
8  
9  
10  
11  
12  
13  
14  
15  
16  
17  
18  
19  
20  
21  
22  
23  
24  
25  
26  
27  
28  
29  
30  
31  
32  
33  
34  
35  
36  
37  
38  
39  
40  
41  
42  
43  
44  
45  
46  
47  
48  
49  
50  
51  
52  
53  
54  
55  
56  
57  
58  
59  
60

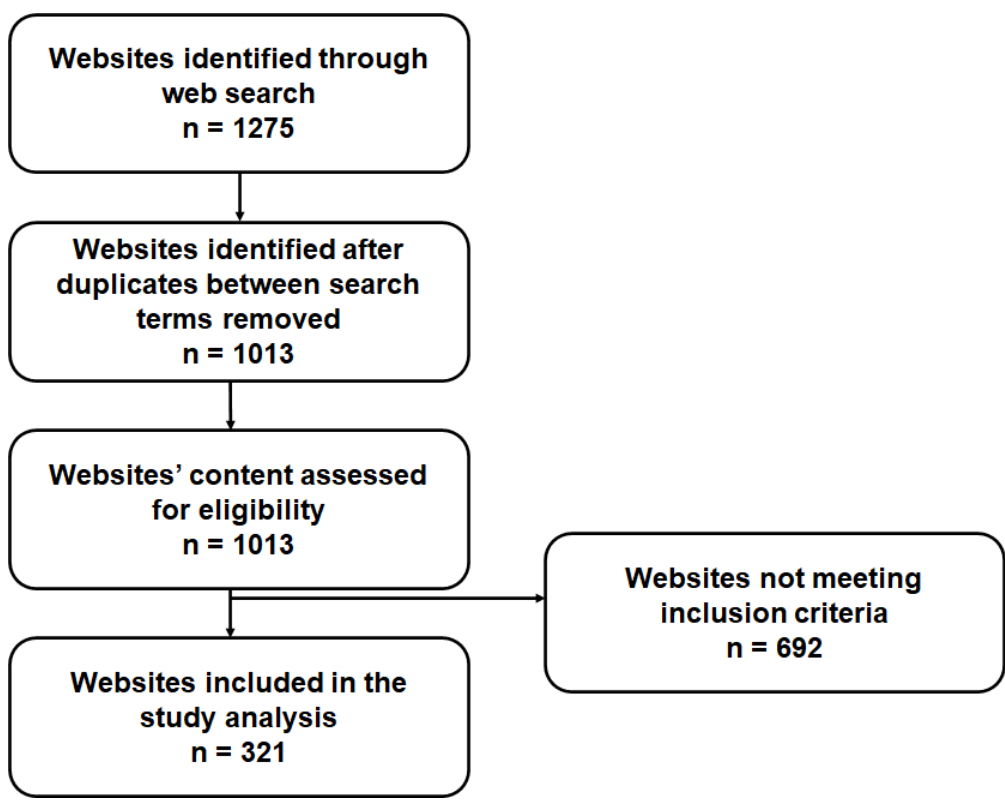

Figure 1. Workflow of webscraping and exclusion

70x55mm (300 x 300 DPI)

1  
2  
3  
4  
5  
6  
7  
8  
9  
10  
11  
12  
13  
14  
15  
16  
17  
18  
19  
20  
21  
22  
23  
24  
25  
26  
27  
28  
29  
30  
31  
32  
33  
34  
35  
36  
37  
38  
39  
40  
41  
42  
43  
44  
45  
46  
47  
48  
49  
50  
51  
52  
53  
54  
55  
56  
57  
58  
59  
60

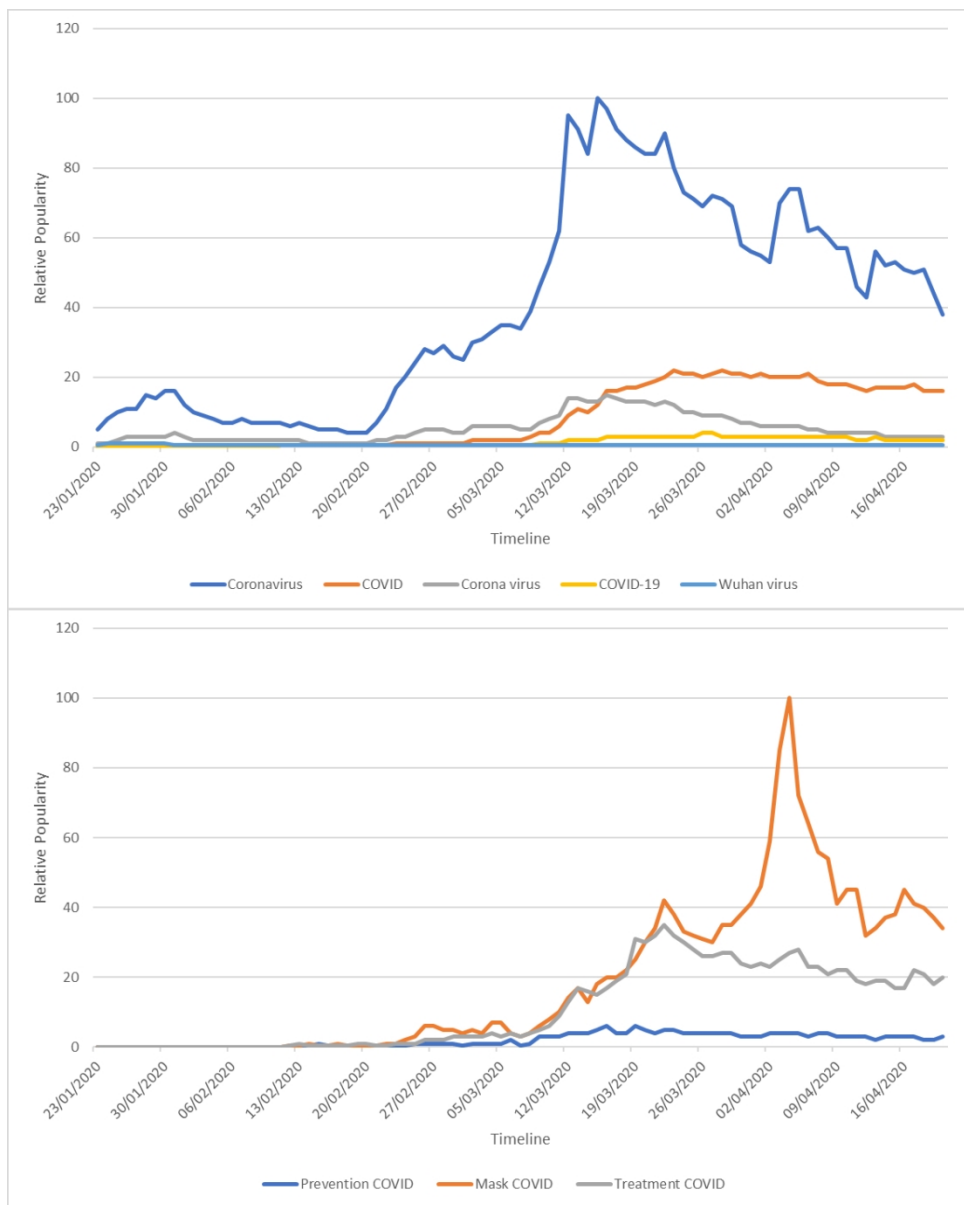

Figure 2. Popular search terms

99x123mm (300 x 300 DPI)

1  
2  
3  
4  
5  
6  
7  
8  
9  
10  
11  
12  
13  
14  
15  
16  
17  
18  
19  
20  
21  
22  
23  
24  
25  
26  
27  
28  
29  
30  
31  
32  
33  
34  
35  
36  
37  
38  
39  
40  
41  
42  
43  
44  
45  
46  
47  
48  
49  
50  
51  
52  
53  
54  
55  
56  
57  
58  
59  
60

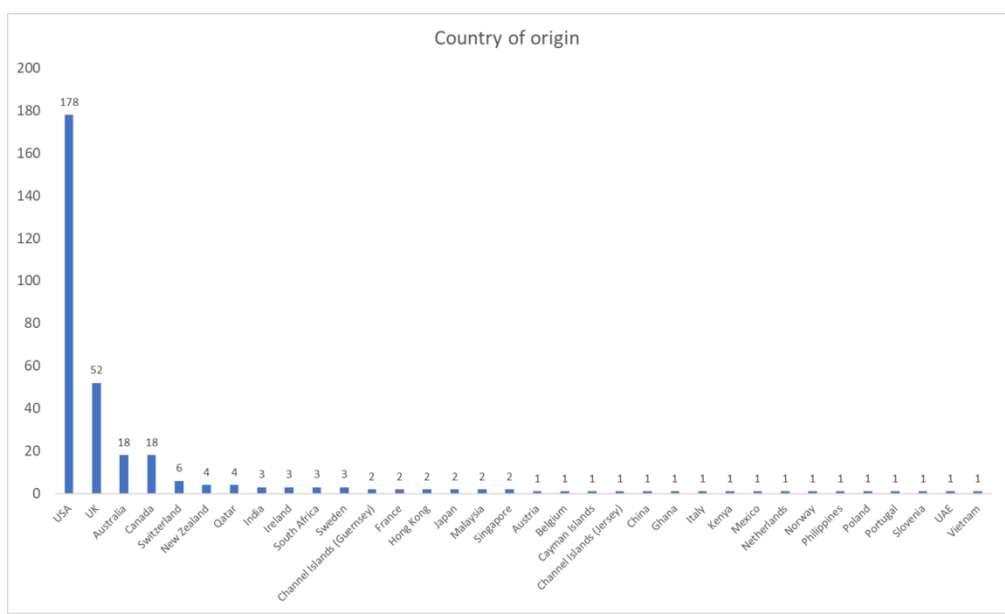

Figure 3. Country of origin of websites

132x79mm (300 x 300 DPI)

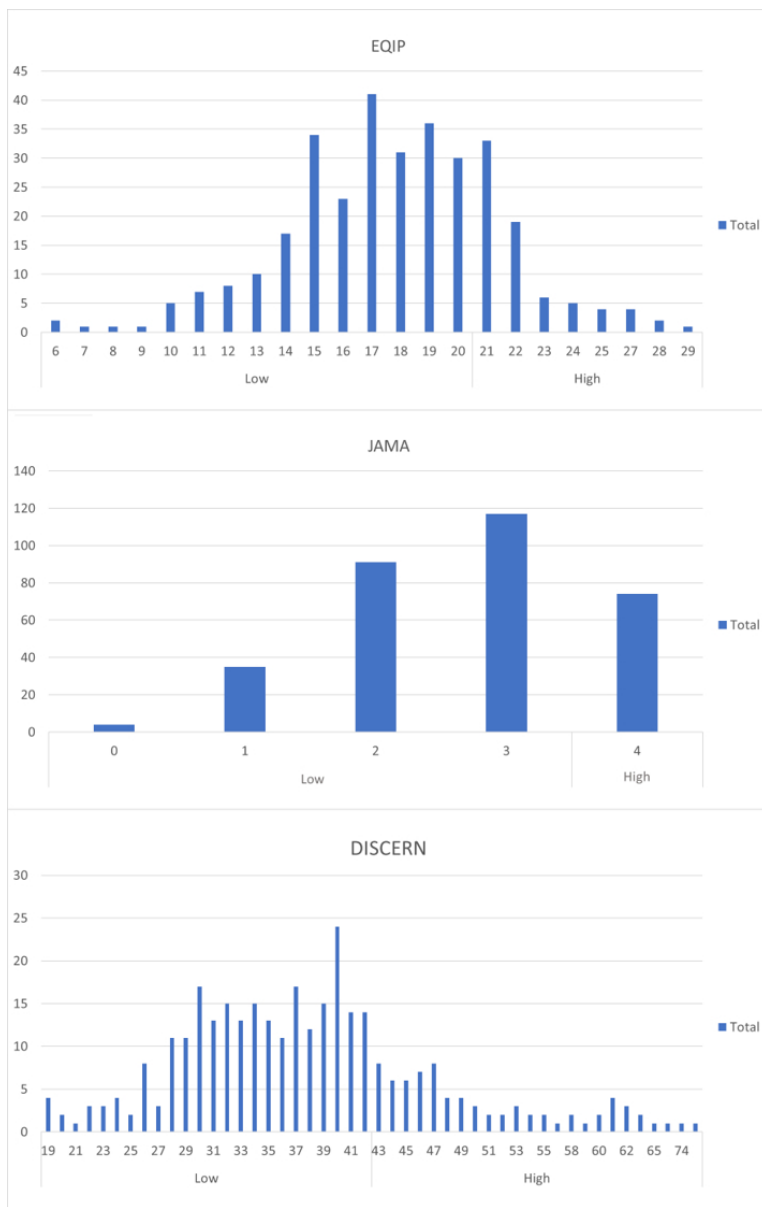

Figure 4. High-score distribution of websites

60x94mm (300 x 300 DPI)

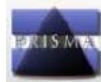

# PRISMA 2009 Checklist

| Section/topic                      | #  | Checklist item                                                                                                                                                                                                                                                                                              | Reported on page # |
|------------------------------------|----|-------------------------------------------------------------------------------------------------------------------------------------------------------------------------------------------------------------------------------------------------------------------------------------------------------------|--------------------|
| <b>TITLE</b>                       |    |                                                                                                                                                                                                                                                                                                             |                    |
| Title                              | 1  | Identify the report as a systematic review, meta-analysis, or both.                                                                                                                                                                                                                                         | 2                  |
| <b>ABSTRACT</b>                    |    |                                                                                                                                                                                                                                                                                                             |                    |
| Structured summary                 | 2  | Provide a structured summary including, as applicable: background; objectives; data sources; study eligibility criteria, participants, and interventions; study appraisal and synthesis methods; results; limitations; conclusions and implications of key findings; systematic review registration number. | 4                  |
| <b>INTRODUCTION</b>                |    |                                                                                                                                                                                                                                                                                                             |                    |
| Rationale                          | 3  | Describe the rationale for the review in the context of what is already known.                                                                                                                                                                                                                              | 6-7                |
| Objectives                         | 4  | Provide an explicit statement of questions being addressed with reference to participants, interventions, comparisons, outcomes, and study design (PICOS).                                                                                                                                                  | 6-7                |
| <b>METHODS</b>                     |    |                                                                                                                                                                                                                                                                                                             |                    |
| Protocol and registration          | 5  | Indicate if a review protocol exists, if and where it can be accessed (e.g., Web address), and, if available, provide registration information including registration number.                                                                                                                               | 8                  |
| Eligibility criteria               | 6  | Specify study characteristics (e.g., PICOS, length of follow-up) and report characteristics (e.g., years considered, language, publication status) used as criteria for eligibility, giving rationale.                                                                                                      | 7-8                |
| Information sources                | 7  | Describe all information sources (e.g., databases with dates of coverage, contact with study authors to identify additional studies) in the search and date last searched.                                                                                                                                  | 7-8                |
| Search                             | 8  | Present full electronic search strategy for at least one database, including any limits used, such that it could be repeated.                                                                                                                                                                               | 7-8                |
| Study selection                    | 9  | State the process for selecting studies (i.e., screening, eligibility, included in systematic review, and, if applicable, included in the meta-analysis).                                                                                                                                                   | 6-8                |
| Data collection process            | 10 | Describe method of data extraction from reports (e.g., piloted forms, independently, in duplicate) and any processes for obtaining and confirming data from investigators.                                                                                                                                  | 8-10               |
| Data items                         | 11 | List and define all variables for which data were sought (e.g., PICOS, funding sources) and any assumptions and simplifications made.                                                                                                                                                                       | 8-10               |
| Risk of bias in individual studies | 12 | Describe methods used for assessing risk of bias of individual studies (including specification of whether this was done at the study or outcome level), and how this information is to be used in any data synthesis.                                                                                      | 8-10               |
| Summary measures                   | 13 | State the principal summary measures (e.g., risk ratio, difference in means).                                                                                                                                                                                                                               | 8-10               |
| Synthesis of results               | 14 | Describe the methods of handling data and combining results of studies, if done, including measures of consistency (e.g., $I^2$ ) for each meta-analysis.                                                                                                                                                   | 10                 |

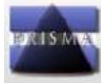

# PRISMA 2009 Checklist

Page 1 of 2

| Section/topic                 | #  | Checklist item                                                                                                                                                                                           | Reported on page # |
|-------------------------------|----|----------------------------------------------------------------------------------------------------------------------------------------------------------------------------------------------------------|--------------------|
| Risk of bias across studies   | 15 | Specify any assessment of risk of bias that may affect the cumulative evidence (e.g., publication bias, selective reporting within studies).                                                             | N/A                |
| Additional analyses           | 16 | Describe methods of additional analyses (e.g., sensitivity or subgroup analyses, meta-regression), if done, indicating which were pre-specified.                                                         | N/A                |
| <b>RESULTS</b>                |    |                                                                                                                                                                                                          |                    |
| Study selection               | 17 | Give numbers of studies screened, assessed for eligibility, and included in the review, with reasons for exclusions at each stage, ideally with a flow diagram.                                          | 10, Figure 1       |
| Study characteristics         | 18 | For each study, present characteristics for which data were extracted (e.g., study size, PICOS, follow-up period) and provide the citations.                                                             | 10-11              |
| Risk of bias within studies   | 19 | Present data on risk of bias of each study and, if available, any outcome level assessment (see item 12).                                                                                                | N/A                |
| Results of individual studies | 20 | For all outcomes considered (benefits or harms), present, for each study: (a) simple summary data for each intervention group (b) effect estimates and confidence intervals, ideally with a forest plot. | N/A                |
| Synthesis of results          | 21 | Present results of each meta-analysis done, including confidence intervals and measures of consistency.                                                                                                  | N/A                |
| Risk of bias across studies   | 22 | Present results of any assessment of risk of bias across studies (see Item 15).                                                                                                                          | N/A                |
| Additional analysis           | 23 | Give results of additional analyses, if done (e.g., sensitivity or subgroup analyses, meta-regression [see Item 16]).                                                                                    | 10-12              |
| <b>DISCUSSION</b>             |    |                                                                                                                                                                                                          |                    |
| Summary of evidence           | 24 | Summarize the main findings including the strength of evidence for each main outcome; consider their relevance to key groups (e.g., healthcare providers, users, and policy makers).                     | 12-17              |
| Limitations                   | 25 | Discuss limitations at study and outcome level (e.g., risk of bias), and at review-level (e.g., incomplete retrieval of identified research, reporting bias).                                            | 17                 |
| Conclusions                   | 26 | Provide a general interpretation of the results in the context of other evidence, and implications for future research.                                                                                  | 17-18              |
| <b>FUNDING</b>                |    |                                                                                                                                                                                                          |                    |
| Funding                       | 27 | Describe sources of funding for the systematic review and other support (e.g., supply of data); role of funders for the systematic review.                                                               | 2                  |

From: Moher D, Liberati A, Tetzlaff J, Altman DG, The PRISMA Group (2009). Preferred Reporting Items for Systematic Reviews and Meta-Analyses: The PRISMA Statement. PLoS Med 6(7): e1000097. doi:10.1371/journal.pmed1000097

For more information, visit: [www.prisma-statement.org](http://www.prisma-statement.org).

Page 2 of 2  
For peer review only - <http://bmjopen.bmj.com/site/about/guidelines.xhtml>

# BMJ Open

## A systematic analysis and quality assessment of COVID-19 treatment and prevention information on the Internet

|                                 |                                                                                                                                                                                                                                                                                                                                                                                                                                                                                                                                                                                                |
|---------------------------------|------------------------------------------------------------------------------------------------------------------------------------------------------------------------------------------------------------------------------------------------------------------------------------------------------------------------------------------------------------------------------------------------------------------------------------------------------------------------------------------------------------------------------------------------------------------------------------------------|
| Journal:                        | <i>BMJ Open</i>                                                                                                                                                                                                                                                                                                                                                                                                                                                                                                                                                                                |
| Manuscript ID                   | bmjopen-2020-040487.R1                                                                                                                                                                                                                                                                                                                                                                                                                                                                                                                                                                         |
| Article Type:                   | Original research                                                                                                                                                                                                                                                                                                                                                                                                                                                                                                                                                                              |
| Date Submitted by the Author:   | 21-Jul-2020                                                                                                                                                                                                                                                                                                                                                                                                                                                                                                                                                                                    |
| Complete List of Authors:       | Fan, Ka Siu; St George's University Hospitals NHS Foundation Trust, Ghani, Shahi; St George's University Hospitals NHS Foundation Trust Machairas, Nikolaos ; Royal Free Hospital, Department of HPB Surgery and Liver Transplant<br>Lenti, Lorenzo; St George's University Hospitals NHS Foundation Trust<br>Fan, Ka Hay; Imperial College London<br>Richardson, Daniel; St George's University Hospitals NHS Foundation Trust<br>Scott, Aneya; St George's University Hospitals NHS Foundation Trust<br>Raptis, Dimitri; Royal Free Hospital, Department of HPB Surgery and Liver Transplant |
| <b>Primary Subject Heading</b>: | Health informatics                                                                                                                                                                                                                                                                                                                                                                                                                                                                                                                                                                             |
| Secondary Subject Heading:      | Infectious diseases, Patient-centred medicine, Public health                                                                                                                                                                                                                                                                                                                                                                                                                                                                                                                                   |
| Keywords:                       | World Wide Web technology < BIOTECHNOLOGY & BIOINFORMATICS, Health informatics < BIOTECHNOLOGY & BIOINFORMATICS, JOURNALISM (see Medical Journalism)                                                                                                                                                                                                                                                                                                                                                                                                                                           |
|                                 |                                                                                                                                                                                                                                                                                                                                                                                                                                                                                                                                                                                                |

SCHOLARONE™  
Manuscripts



I, the Submitting Author has the right to grant and does grant on behalf of all authors of the Work (as defined in the below author licence), an exclusive licence and/or a non-exclusive licence for contributions from authors who are: i) UK Crown employees; ii) where BMJ has agreed a CC-BY licence shall apply, and/or iii) in accordance with the terms applicable for US Federal Government officers or employees acting as part of their official duties; on a worldwide, perpetual, irrevocable, royalty-free basis to BMJ Publishing Group Ltd ("BMJ") its licensees and where the relevant Journal is co-owned by BMJ to the co-owners of the Journal, to publish the Work in this journal and any other BMJ products and to exploit all rights, as set out in our [licence](#).

The Submitting Author accepts and understands that any supply made under these terms is made by BMJ to the Submitting Author unless you are acting as an employee on behalf of your employer or a postgraduate student of an affiliated institution which is paying any applicable article publishing charge ("APC") for Open Access articles. Where the Submitting Author wishes to make the Work available on an Open Access basis (and intends to pay the relevant APC), the terms of reuse of such Open Access shall be governed by a Creative Commons licence – details of these licences and which [Creative Commons](#) licence will apply to this Work are set out in our licence referred to above.

Other than as permitted in any relevant BMJ Author's Self Archiving Policies, I confirm this Work has not been accepted for publication elsewhere, is not being considered for publication elsewhere and does not duplicate material already published. I confirm all authors consent to publication of this Work and authorise the granting of this licence.



## Cover Letter

Dear Editor,

We would like to submit to you the manuscript under the title of “A systematic analysis and quality assessment of COVID-19 treatment and prevention information on the Internet”.

Our work sets out to evaluate the quality of information available to the public regarding both the treatment and prevention of COVID-19 using validated assessment tools. These tools, which have been used in the past to assess quality, include the Ensuring Quality Information for Patients (EQIP) tool, JAMA benchmark and the DISCERN tool, all of which have been proven to be robust and effective at assessing online health information.

To the best of our knowledge, this is the first study to evaluate the nature and quality of information regarding COVID-19 currently available to the public. Our findings indicate that most websites were unable to provide adequate information on both treatment and preventative methods and were generally of poor quality. Without interventions to improve these websites, they will likely impact the awareness and actions of the wider public and, by extension, affect the efficacy of public health measures. Our study reflects the ongoing need for high-quality information while it is still possible to influence its dissemination, especially for countries that are now entering the growth phase.

We believe that this report, as well as the subtopics it addresses, will be of interest for the readers of your respectable journal.

We hereby certify that the authors of the above manuscript have all: 1) Conceived, planned, and performed the work leading to this article, 2) Written the article or reviewed successive versions and shared in their revisions, 3) Approved the final version. Further, we certify that this work has neither been published in whole or in part elsewhere nor is under consideration elsewhere, and we accept full responsibility for the design and conduct of the study.

Yours sincerely,

Ka Siu Fan, BSc and Shahi Abdul Ghani, MSc, DHMSA

On behalf of Dimitri Aristotle Raptis, MD, MSc, PhD and the authors

1  
2  
3 **A systematic analysis and quality assessment of COVID-19 treatment and prevention**  
4 **information on the Internet**  
5

6  
7 Ka Siu Fan, BSc\*<sup>1</sup>, Shahi Abdul Ghani, MSc, DHMSA\*<sup>1</sup>, Nikolaos Machairas, MD, PhD<sup>2</sup>,  
8  
9 Lorenzo Lenti, BSc<sup>1</sup>, Ka Hay Fan<sup>3</sup>, Daniel Richardson, BSc<sup>1</sup>, Aneya Scott, MChem<sup>1</sup>, Dimitri  
10  
11 Aristotle Raptis MD, MSc, PhD<sup>2</sup>  
12

13  
14 \*Ka Siu Fan and Shahi Abdul Ghani contributed equally to this paper.

- 15  
16 1. St. Georges University of London, UK  
17  
18 2. Department of HPB Surgery and Liver Transplant, Royal Free Hospital, London, UK  
19  
20 3. Imperial College London, UK  
21  
22

23  
24 **Corresponding author:**  
25

26 Dr Dimitri Aristotle Raptis MD, MSc, PhD  
27  
28 Department of HPB Surgery and Liver Transplant  
29  
30 Royal Free Hospital, London, UK  
31  
32 [Dimitri.Raptis@NHS.net](mailto:Dimitri.Raptis@NHS.net)  
33

34  
35  
36  
37 **Conflict of interest:** The authors have no conflicts of interests or funding sources to  
38  
39 disclose  
40  
41

42  
43 **Acknowledgements:** None  
44  
45

46  
47 **Statement of Author Contribution:**  
48

49 Study conception and design: DAR, NM, SAG, KSF

50 Acquisition of data: SAG, KSF, LL, KHF, DR, AS

51 Analysis and interpretation of data: KSF, SAG, NM, DAR

52 Drafting of manuscript: KSF, SAG, NM, KHF

53  
54  
55  
56  
57  
58  
59  
60  
60 Critical revision: KSF, SAG, NM, DAR

1  
2  
3 **Word count:** 6264  
4

5 **Keywords:** Coronavirus, Internet, Patient Education Handout, Public Health Informatics,  
6  
7 Search Engine  
8  
9  
10  
11  
12  
13  
14  
15  
16  
17  
18  
19  
20  
21  
22  
23  
24  
25  
26  
27  
28  
29  
30  
31  
32  
33  
34  
35  
36  
37  
38  
39  
40  
41  
42  
43  
44  
45  
46  
47  
48  
49  
50  
51  
52  
53  
54  
55  
56  
57  
58  
59  
60

For peer review only

## Abstract

**Objective:** To evaluate the quality of information regarding the treatment and prevention of COVID-19 available to the general public from all countries.

**Design:** Systematic analysis using the 'Ensuring Quality Information for Patients' (EQIP) tool (score 0-36), JAMA benchmark (score 0-4) and the DISCERN tool (score 16-80) to analyse websites containing information targeted at the general public.

**Data Sources:** Twelve popular search-terms, including 'Coronavirus', 'COVID 19', 'Wuhan virus', 'How to treat coronavirus' and 'COVID 19 Prevention' were identified by 'Google AdWords' and 'Google Trends'. Unique links from the first 10 pages for each search-term were identified and evaluated on its quality of information.

**Eligibility Criteria for selecting studies:** All websites written in the English language, and provides information on prevention or treatment of COVID-19 intended for the general public were considered eligible. Any websites intended for professionals, or specific isolated populations, such as students from one particular school, were excluded, as well as websites with only video content, marketing content, daily caseload update or news dashboard pages with no health information.

**Results:** Of the 1275 identified websites, 321 (25%) were eligible for analysis. The overall EQIP, JAMA and DISCERN scores were 17.8, 2.7 and 38.0. Websites originated from 34 countries, with the majority from the USA (55%). News Services (50%) and Government/Health Departments (27%) were the most common sources of information and their information quality varied significantly. Majority of websites discuss prevention alone despite popular search trends of COVID-19 treatment. Websites discussing both treatment and prevention (n=73, 23%) score significantly higher across all tools ( $P<0.001$ ).

**Conclusion:** This comprehensive assessment of online COVID-19 information using EQIP, JAMA and DISCERN tools indicate that most websites were inadequate. This necessitates improvements in online resources to facilitate public health measures during the pandemic.

## Section 1: What is already known on this topic

- Since the declaration of COVID-19 as a pandemic on 12th March, the WHO, UN and EU have reported that unreliable information, or worse, disinformation has reduced the impact of their efforts in informing the public on matters related to the pandemic; leading to poor uptake of public health advice amongst certain communities.
- Research from previous outbreaks such as the Ebola outbreak from 2013-16 has identified that effective public education and public health intervention relies on public access to high-quality health information.
- As governments are relying heavily on a widespread concordance to public health advice during the COVID-19 pandemic, it is important to characterise the health information seeking habits of the public, the quality of the information that is available, and whether the information meets the needs identified through search habits at this time.

## Section 2: What this study adds

- For this study, we identified 12 search-terms used by those seeking information related to COVID-19, 321 of the 1275 obtained websites met our eligibility criteria for analysis.
- An analysis with three widely respected tools (EQIP, DISCERN and JAMA benchmark) identified that the majority of websites poorly referenced sources of information or provided inadequate information, reflecting the ongoing need for better quality information regarding COVID-19 aimed at the public.

## Introduction

With the increasing popularity of the Internet, both the accessibility and availability of health information has increased drastically and is now a primary source of information for many.[1,2] It is known that health information-seeking behaviour also applies to the use of online resources and has become ever more important during the current Coronavirus disease 2019 (COVID-19) pandemic[3] Information on such a widely-discussed topic will inevitably be vast and vary in production quality, potentially adversely affecting patient awareness and health-seeking behaviour.[4] Many of these resources read by the public may be unreliable or produced from non-peer-reviewed sources and affect behaviours such as recognition of symptoms, taking appropriate preventative precautions or seeking timely treatment.[3,5,6] Furthermore, inaccurate online information may contradict healthcare professionals and potentially compromise the trusting relationship with patients, worsening outcomes.[7]

Since the declaration of COVID-19 as a pandemic on 12th March 2020, its prevalence and mortality have continued to rise[8,9] and lead to the introduction of various measures such as social distancing, quarantine procedures and lockdown protocols.[10] As evidenced by previous outbreaks, effective public education and public health intervention rely on access to health information[11,12], which is now primarily delivered through the Internet. Many countries have since introduced lockdown and quarantine protocols as their mainstay preventative measures[13] but public health continues to be threatened by certain populations.[14] Due to both the novelty and rapid developments of COVID-19, there is a significant barrier for individuals to critically appraise online resources and, hence, necessitates a quantitative evaluation of the popular information sources available to the wider public.

Many instruments have been developed to evaluate patient information and may also be applied to online COVID-19 information.[15] The modified Ensuring Quality of Information for

1  
2  
3 Patients (EQIP) tool is a reproducible modality used in previous studies to evaluate the  
4 reliability and quality of all information types, providing a robust assessment of quality,  
5 readability and design aspects of any written information[16–18]. Previously, our group  
6  
7 evaluated online information using the modified EQIP tool in a variety of conditions and  
8  
9 procedures including bariatric surgery[19], Dupuytren's disease[20], carpal tunnel  
10  
11 disease[21], breast augmentation[22], liposuction[16] and liver transplantation[23]. The  
12  
13 Minervation validation instrument (LIDA)[24], Flesch Reading Ease (FRE) Score and the  
14  
15 Flesch-Kincaid Grade (FKG) have also been used to evaluate the quality of online health  
16  
17 information.[25] However, they are not considered appropriate here as only assesses  
18  
19 readability and website design, which is adequately covered by EQIP.[26] Tools such as the  
20  
21 Journal of American Medical Association (JAMA) benchmark and the DISCERN tool (no  
22  
23 acronym) have also been used to evaluate online health information and their combinational  
24  
25 use can provide a more comprehensive evaluation.[18,27,28] Given that the Internet has  
26  
27 become an ever-important source of information and can determine health-seeking  
28  
29 behaviour, which by extension can affect the progression of COVID-19. Hence, our study  
30  
31 aims to assess the quality of information of top indexed websites that discuss information,  
32  
33 prevention, or treatment of COVID-19 using the modified EQIP tool, JAMA benchmark and  
34  
35 DISCERN tool.  
36  
37  
38  
39  
40  
41  
42

## 43 **Methods**

### 44 **Eligibility criteria, information sources and data selection**

45  
46 On 27<sup>th</sup> March 2020, 12 search-terms and phrases were queried on the most used search  
47  
48 engine, Google[29–31], to obtain a database of websites. Only Google was used as previous  
49  
50 studies have shown that the use of multiple search engines will only provide duplicate  
51  
52 results. To increase the number of results, more search-terms were used: 'Coronavirus',  
53  
54 'COVID 19', 'Stop getting Coronavirus', 'Corona Virus', 'How to treat coronavirus',  
55  
56 'Coronavirus safety tips', 'Drugs for coronavirus', 'What is self isolation coronavirus', 'China  
57  
58 virus', 'Wuhan virus', 'Coronavirus Medicine' and 'COVID 19 prevention'. These were  
59  
60

1  
2  
3 commonly searched phrases identified using the 'Google Adwords Keyword Planner'[32].  
4  
5 Google AdWords allows the input of a term (in this case coronavirus) which then provides  
6  
7 popular related keyword suggestions. The most popular search-terms were 'Coronavirus',  
8  
9 followed by 'COVID' and 'Corona Virus' and their respective search popularity peaked in  
10  
11 mid- and late-March 2020 respectively. **Figure 1** summarises the most popular search  
12  
13 trends. Only the first 10 pages of unique websites were identified and recorded as previous  
14  
15 work suggests patients tend to stay within the first 100 returned webpages[17,23]. Various  
16  
17 search-terms and their relative popularity were also collected directly from Google  
18  
19 Trends[33] for further comparative analysis.  
20  
21  
22  
23

24 All websites written in the English language and providing information on prevention or  
25  
26 treatment of COVID-19 intended for the general public or COVID-19 patients were  
27  
28 considered eligible for inclusion. Any subsidiary pages or subdirectories of a website that  
29  
30 contained information for the public and were easily accessible are also assessed. Websites  
31  
32 or articles intended for professionals or specific population subsets, such as students alone,  
33  
34 were excluded. Weblinks to purely video content, marketing content, daily caseload update  
35  
36 or news dashboard pages with no educational purposes were excluded. The creation of the  
37  
38 website database, eligibility assessment, website assessment and statistical analysis was  
39  
40 performed within 4 weeks between March and April 2020.  
41  
42  
43  
44

### 45 **Website Scraping**

46  
47 A website scraping tool was developed to identify and record all unique websites from the  
48  
49 first 10 pages of Google results. The tool utilises custom PHP to make HTTP requests to the  
50  
51 search engine to mimic the requests made by the public. The queries were made from a  
52  
53 server located in Texas, USA but no preferences were made to limit searches by  
54  
55 geographical region. The tool makes repeated requests, logs the first 10 pages of unique  
56  
57 URLs and outputs the dataset after excluding all duplicate links within each search-term A  
58  
59 minority of websites were restricted by General Data Protection Regulation (GDPR) and  
60



1  
2  
3 were accessed through the use of virtual private networks (VPN) as any websites that could  
4 reasonably be accessed by the general public were included.  
5  
6  
7  
8

### 9 **Data entry**

10  
11 Six assessors, (SAG, KSF, KHF, LL, AS and DR), all of whom fluent in English,  
12 independently assessed the websites between 30 March and 13 April 2020. The evaluation  
13 included 36 EQIP items and four items on JAMA benchmark, all assessed through 'Yes, No  
14 or N/A' questions. DISCERN tool adds a further 16 items to assess reliability and quality of  
15 information on treatment using scales of 1 to 5. Assessors also recorded the country of  
16 origin, and type of source: Academic Centre, Charity/Non-Governmental Organisation,  
17 Encyclopaedia, Government/Health Department, Hospital, Industry, News Service, Patient  
18 Group, Practitioner, and Professional Society. Organisations that primarily serves patients,  
19 such as Patient.info, is considered a 'Patient Group' whereas non-governmental  
20 organisations that oversee a broader demographic, like Red Cross and World Health  
21 Organization (WHO), are classified as 'Charity/Non-Governmental Organisation'. News  
22 service includes both primary and secondary news articles that are not written for  
23 professionals. 'Practitioner' considers the for-profit webpages of individual medical  
24 practitioners, whereas 'Industry' considers organisations within the medical industry.  
25 'Academic Centres' consider all sources from academic institutions, while 'Professional  
26 Society' refer to non-profit groups of healthcare professionals. Qualitative information about  
27 preventative methods and treatment was also recorded. After the initial round of data entry,  
28 each website was verified on a second-round between 14 April and 21 April by a verifier who  
29 has had previous experience performing data entry for evaluation of patient health  
30 information.  
31  
32  
33  
34  
35  
36  
37  
38  
39  
40  
41  
42  
43  
44  
45  
46  
47  
48  
49  
50  
51  
52  
53  
54  
55

### 56 **EQIP Tool**

57  
58 The Ensuring Quality Information for Patients (EQIP) tool consists of 20 items, acting as a  
59 checklist for criteria such as quality of written work, design and coherence.[34] More  
60

1  
2  
3 recently, modifications were made to the EQIP tool, expanding the criteria to 36 items[35], to  
4 satisfy both the guidelines of British Medical Association (BMA)[36] and International Patient  
5 Decision Aids Standards (IPDAS) collaboration[37] on ideal information for patients and  
6 have been utilised in a variety of specialities previously.[16–18] A decision was made to use  
7 the modified EQIP tool as the inclusion of 'partly yes' in the original EQIP introduces  
8 subjectiveness into the responses and has been shown to lower its reliability.[23,34] 36  
9 items across three domains were included: Content (items 1-18), Identification (items 19-24)  
10 and Structure (items 25-36). Similar to previous uses, 'Yes/No' binary questions reduce  
11 assessor subjectivity in partial answers. 'N/A' option was also included if items were not  
12 relevant for the type of source. The Content domain assesses whether an adequate amount  
13 of information is included in an article, ranging from a description of the medical problem  
14 itself (items 1-3,11,14) to details of its management and complications (items 4-11).  
15 Identification domain assesses how well a website displays its production details, including  
16 date of issue, author, finance sources and bibliography (items 19-24). Structure domain  
17 evaluates the readability of a website and how well it accommodates to its audience, such as  
18 delivering the information through short, non-contradictory statements arranged in a logical  
19 layout (items 25-36). As COVID-19 is an emergent disease, certain items are tailored to  
20 accommodate for the limited evidence: describing treatment (item 3) include articles that  
21 address the lack of proven treatment, and alert signs (item 14) include recognised COVID-19  
22 symptoms such as fever, cough and changes in taste or smell. A cut-off point of 75<sup>th</sup>  
23 percentile was set for EQIP score to discriminate between high-scoring from low-scoring  
24 websites as was done in previous studies.  
25  
26  
27  
28  
29  
30  
31  
32  
33  
34  
35  
36  
37  
38  
39  
40  
41  
42  
43  
44  
45  
46  
47  
48  
49  
50  
51

### 52 **JAMA Benchmark**

53  
54 Critical appraisals of Internet-based resources are also assessed by one of the earliest core  
55 standards identified by JAMA in 1997.[38] This checklist was proposed by Silberg *et al.* to  
56 assist the appraisal and evaluation of the credibility of unregulated Internet resources and  
57  
58  
59  
60

1  
2  
3 have been used in various studies previously[39,40]. This is evaluated by four items:  
4 Authorship, Attribution, Disclosure and Currency: Authorship requires identification of  
5 authors, credentials and their affiliations; Attribution requires appropriate citations on written  
6 information; Disclosure requires transparency of the website owner and conflicts of interests;  
7 Currency requires a clear indication of the date of publication and updates. Similarly, the  
8 'Yes/No' criterion is implemented to reduce the subjectivity of partial answers.  
9  
10  
11  
12  
13  
14  
15  
16  
17

### 18 **DISCERN Tool**

19  
20 The DISCERN evaluation tool was first developed in 1998 at Oxford to judge the quality of  
21 information regarding treatment choices.[41] This tool has been validated and used across  
22 various specialities to assess treatment information.[28,39,42] This consisted of 16 items to  
23 assesses both the reliability and level of detail on treatments as well as the overall quality of  
24 the information. The reliability section (items 1-8) evaluates the ability of a website to  
25 achieve its aims while remaining unbiased and providing its sources of information. Quality  
26 section (items 9-15) evaluates the content specifically for describing the rationale, methods  
27 and alternatives to the current management of a disease. Criteria for treatment section was  
28 adjusted to accommodate the treatment uncertainty and items are considered fulfilled as  
29 long as the website discusses the relevant information with regards to potential drugs or  
30 interventions such as assisted ventilation. A score between 1 and 5 can be assigned to each  
31 item, with 1 being 'No', 3 being 'Partial' and 5 being 'Yes'. To improve assessment accuracy,  
32 overall quality of information will be scored in proportion to the mean scores calculated from  
33 the answers to items 1-15, with 1 being the lowest and 5 being the highest.  
34  
35  
36  
37  
38  
39  
40  
41  
42  
43  
44  
45  
46  
47  
48  
49  
50

### 51 **Additional Items**

52  
53 Additional items were included to further assess the websites, including whether a website  
54 discussed prevention methods, current treatments and the role of empirical evidence in the  
55 prevention or treatment for COVID-19. Data collected were in the form of 'Yes/No' to reduce  
56 the ambiguity of partial answers again. Additionally, details provided by the website on these  
57  
58  
59  
60

1  
2  
3 items were recorded if the item scores 'Yes'. Websites were further analysed by whether  
4  
5 their purpose is prevention, treatment, or both.  
6  
7  
8

### 9 **Statistical Analysis**

10  
11 The dataset consisted of both continuous and categorical variables, which are reported as  
12  
13 the mean, median and interquartile range (IQR) as well as numbers and percentages  
14  
15 respectively. High-scoring websites are identified as those with scores above the 75<sup>th</sup>  
16  
17 percentile for all three tools. Kruskal-Wallis tests were used for the analysis of continuous  
18  
19 variables where appropriate and intraclass correlation coefficient (ICC) was calculated to  
20  
21 identify the correlation between website analysis test methods. Fisher's or  $\chi^2$  tests were  
22  
23 used to analyse proportions where appropriate. Inter-rater reliability of each assessor was  
24  
25 evaluated using Bland-Altman plots. All P values were two-tailed and considered significant  
26  
27 when  $P < 0.05$ . R version 3.3.2 (R Core Team, GNU GPL v2 License), R Studio version  
28  
29 1.0.44 (RStudio, Inc. GNU Affero General Public License v3, Boston, MA, 2016) and their  
30  
31 respective graphical user interface (GUI) rBiostatistics.com (rBiostatistics.com, London,  
32  
33 Switzerland, 2017)[43] was used to perform the statistical analysis.  
34  
35  
36  
37  
38

### 39 **Patient and Public Involvement**

40  
41 There were no patient or public involvement in the conception, design or data collection of  
42  
43 the study or the production of the manuscript.  
44  
45  
46  
47  
48

### 49 **Results**

#### 50 51 **Gathering of websites with information on COVID-19, its prevention and its** 52 53 **management** 54

55  
56 A database of websites was gathered from the first 10 pages of unique URLs returned using  
57  
58 the 12 search-terms. The final dataset included 1275 URLs. After filtering out duplicate  
59  
60 results and websites that failed to meet our inclusion criteria, 321 remained eligible for

1  
2  
3 analysis. The workflow of dataset creation is shown in **Figure 2**. List of websites was  
4 obtained on a single day, 27<sup>th</sup> March 2020, and website evaluation was completed within two  
5 weeks.  
6  
7  
8  
9

### 10 11 **Website demographics and search trends**

12 COVID-19-specific searches regarding treatment and masks were significantly more popular  
13 (P<0.001) than prevention and peaked in mid-March and early-April respectively. The  
14 returned websites originated from 34 different countries (**Figure 3 and 4**): the USA produced  
15 the most websites (n=178), followed by the United Kingdom (n=52), Australia (n=18) and  
16 Canada (n=18). However, no statistically significant differences were observed between the  
17 four countries across all tools. The source of information and website category is shown in  
18 **Table 1**. News Services were the most common source of information (n=163), followed by  
19 Health Departments/Government (n=87).  
20  
21  
22  
23  
24  
25  
26  
27  
28  
29  
30

31  
32 Forty-six websites (14.3%) described treatment methods alone, 202 websites (62.9%)  
33 mentioned treatment methods alone and 73 websites (22.7%) discussed both prevention  
34 and treatment. Of the mentioned prevention methods, 205 (63.9%) described social  
35 isolation, 169 (52.7%) physical distancing, 157 (48.9%) advised staying home and 136  
36 (42.4%) described the benefits of disinfecting or cleaning surfaces. With regards to  
37 mentioned treatment methods, 55 (17.1%) described the use of antiviral medications, 31  
38 (9.7%) described hydroxychloroquine or chloroquine and 26 (8.1%) described the use of  
39 non-steroidal anti-inflammatory drugs such as paracetamol and ibuprofen. Only 31 (9.7%)  
40 websites discussed the use of oxygen, ventilation or fluids as a possible treatment method.  
41  
42  
43  
44  
45  
46  
47  
48  
49  
50  
51

### 52 53 **Overall performance**

54 The mean total score for EQIP, JAMA and DISCERN are 17.78, 2.69 and 38.00 respectively  
55 and their respective 75<sup>th</sup> percentile high-score cut-offs were 21, 4 and 43. No website  
56 achieved the maximum score for EQIP Content (out of 18) or Structure (out of 6) domain but  
57  
58  
59  
60

1  
2  
3 one website did attain maximum for EQIP Identification (out of 12). Seventy-four websites  
4 fulfilled all four JAMA criteria. Four websites achieved the maximum for DISCERN Reliability  
5 (out of 40) but none scored fully in DISCERN Treatment (out of 40). 74 high-scoring  
6 websites were identified for EQIP and JAMA and 76 for DISCERN tool. The mean scores for  
7 each tool and domain are as follows: EQIP Content (9.99 vs 6.07;  $P<0.001$ ), EQIP  
8 Identification (4.03 vs 3.34;  $P<0.001$ ), EQIP Structure (8.45 vs 6.96;  $P<0.001$ ), Total EQIP  
9 (22.46 vs 16.37;  $P<0.001$ ), Total JAMA (4.00 vs 2.30;  $P<0.001$ ), DISCERN Reliability (31.72  
10 vs 25.44;  $P<0.001$ ), DISCERN Treatment (13.49 vs 10.31;  $P=0.002$ ) and Total DISCERN  
11 (45.21 vs 35.76;  $P<0.001$ ).

12  
13  
14 All tools and subsequent domains, except DISCERN Reliability and Total DISCERN scores,  
15 varied significantly between websites of different sources, notably with the Encyclopaedia  
16 (n=5) cohort holding the highest score for all domains. All tools and domains varied between  
17 website cohorts, with websites that include both Treatment and Prevention scoring above  
18 the mean values. **Table 2** and **Table 3** summarises the variation of information quality with  
19 the source of information and website category respectively. A detailed breakdown of the  
20 performance of each item and each tool is displayed in **Supplementary Table 1, 2 and 3**.

### 21 22 23 24 25 26 27 28 29 30 31 32 33 34 35 36 37 38 39 40 41 **Subset analysis of Government/Health Department and News Services**

42 Collectively, 250 (77.9%) of all web links were either Government/Health Departments and  
43 News Services websites, of which 121 (37.7%) were based in the USA. Globally, there is  
44 significant variation between Government/Health Departments and News Services in EQIP  
45 Content (mean 8.11 vs 6.22;  $P<0.001$ ), Total EQIP (mean 18.90 vs 17.06;  $P<0.001$ ), Total  
46 JAMA (mean 2.16 vs 2.98;  $P<0.001$ ) and DISCERN Treatment (mean 9.02 vs 11.72;  
47  $P=0.001$ ). Variations in US websites were similar except for EQIP structure ( $P=0.148$ ). The  
48 US-based cohort scored lower in Total EQIP than the global cohort but USA News Services  
49 specifically scored better in Total JAMA (3.17 vs 2.98) and Total DISCERN (39.25 vs 38.04).  
50 Breakdowns of comparison between the cohorts are provided in **Table 4**.

### High-scoring websites

Sixteen websites scored above 75<sup>th</sup> percentile across all three evaluation tools, 13 were from the USA, 2 from the UK and 1 from Canada. Most were from News Services (n=10), followed by industry (n=4), Encyclopaedia (n=1) and Government/Health Departments (n=1). The top 5 websites with the highest Total EQIP and Total DISCERN scores are shown in **Table 5** with their respective breakdowns. Top JAMA websites were not shown as there were 74 that scored the full four points.

### Intraclass correlation between tools

Intraclass correlation (ICC) between the 3 analysis tools is provided in **Supplementary Figure 1**. The ICC between all three tools was moderate to high 0.48 (95% CI 0.37-0.56). Furthermore, as the JAMA benchmark only offers four scoring variations, the Kruskal-Wallis analysis is used to correlate JAMA with EQIP and DISCERN. The results are shown in **Supplementary Figure 2** and demonstrate statistically significant moderate-high correlation for both JAMA-EQIP and JAMA-DISCERN.

### Inter-rater reliability

Kappa coefficients, ranges and outliers. Mean kappa and SD for each tool. Supplementary Data. Intraclass correlation, 95% CI intervals. Bland-Altman plots. The biases of each tool and assessor are within 95% CI interval limits. The Bland-Altman plots and individual degree of bias have been provided in **Supplementary Figure 3**. The mean degree of bias and 95% confidence intervals for each assessor is identified. Mean bias for EQIP, JAMA and DISCERN were -0.36, +0.29 and +0.51 respectively. Bias for each assessor, within each tool, was minimal and falls within their respective 95% CI.

### Discussion



1  
2  
3 To our knowledge, this is the first study to evaluate the content intended for the public  
4 seeking information for preventing or treating of COVID-19. Our search-terms included  
5 various synonyms of COVID-19 and “open” search-terms to capture the majority of materials  
6 related to our study. While no tools are validated to assess information specifically during  
7 pandemics; this study used a combination of EQIP, JAMA and DISCERN. The combined  
8 scope and efficacy of these tools enable a comprehensive evaluation of all important  
9 aspects for a layperson seeking health information from articles; namely readability,  
10 coherence, design and quality of information.  
11  
12  
13  
14  
15  
16  
17  
18  
19  
20  
21

### 22 **Evaluation of the websites**

23  
24 We determined the quality of information to be low, as indicated by the low 75<sup>th</sup> percentile  
25 cut-offs for EQIP and DISCERN, at 21 and 43 respectively, or 58.3% and 53.8% of their  
26 respective full scores. Abundant COVID-19 content is being produced, as evident in **Figure**  
27 **1**, with the majority being excluded due to its nature rather than inter-term duplications. Most  
28 frequently excluded websites were either daily caseload updates or general news articles  
29 lacking information on prevention and treatment.  
30  
31  
32  
33  
34  
35  
36  
37  
38

39 Websites generally scored poorly, with an EQIP mean and median of 18 (IQR 15-20).  
40 Despite fewer marks allocated to Structure, websites generally outperform the Content  
41 domain (7.30 vs 6.97), suggesting information quality is less adequate than usability. The  
42 indicators assessing referencing quality, such as JAMA benchmark and DISCERN  
43 Reliability, scored similarly at 2.69 (67.3% of maximum) and 26.93 (67.3% of maximum)  
44 respectively but scored lower in the EQIP Identification domain 3.50 (58.3% of maximum),  
45 likely due to more items (i.e. whether patients were involved in the material’s production).  
46 Generally, high-scoring websites performed better in the Content domain, with odds ratios  
47 (OR) between 3-7. The OR was significantly higher for item 4 (defining the purpose of  
48 interventions) (OR 27.78; 95% CI 4.695-1000; P<0.001), suggesting that high-scoring  
49 websites provided greater reasoning behind preventative and treatment measures. While  
50  
51  
52  
53  
54  
55  
56  
57  
58  
59  
60



1  
2  
3 high-scoring websites scored significantly higher across 23 of the 36 EQIP items,  
4 quantitative benefits (item 8) is a notable exception where both cohorts performed poorly  
5 (4.1% vs 2.4%; OR 1.695; 95% CI 0.267-8.197; P=0.436), significantly lower than available  
6 literature.[17,22,23] This likely reflects the general lack of COVID-19 knowledge compared to  
7 previously explored diseases and treatments. High-scoring websites similarly performed  
8 better in Identification (OR ranged between 1.312 and 5.376), with the inclusion of  
9 bibliography (item 23) differing most (41.89% vs 11.74%; OR 5.376; 95% CI 1.727-7.407;  
10 P<0.001) as the majority of said websites seem to lack bibliographies, potentially due to  
11 subpar production quality in a high turnover topic. Structure revealed both high- and low-  
12 scoring websites to provide clear information (item 30; 98.65% vs 89.88%; OR 8.197; 95%  
13 CI 1.294-333.3; P=0.013). High scoring websites provided poor benefit-risk balancing(item  
14 31; 39.19% vs 10.93%; 5.208; 95% CI 2.703-10.101; P<0.001), as did most other websites  
15 assessed (17.5% overall), comparable to existing studies ranging 11% to 44%. As shown in  
16 **Figure 5**, EQIP scores were relatively homogeneous, ranging from 6 to 29, with the majority  
17 between 14-22. Overall performance agreed with available literature that information is  
18 inadequate, as median EQIP scores ranged between 15-19 and IQR ranged 12-20 and 16-  
19 22.[17,19,21,22,44] Furthermore, scores for describing intervention sequence (item 6) and  
20 quantitative risks (item 10) were much lower (15.9% and 0.9% respectively) when compared  
21 against the study on gallstone disease (27% and 21% respectively) or liver transplantation  
22 (66% and 53% respectively). This likely reflects the prioritisation of discussing prevention  
23 and treatment method efficacy over treatment sequences and risks. Item 23 also scored  
24 poorly, both in itself and against literature: only 18.7% of websites provided a short  
25 bibliography whereas studies ranged from 19% in liver transplantation to 47% in  
26 orthognathic surgery. Interestingly, COVID-19 websites scored well in dating (item 19;  
27 87.2%) compared literature, likely reflecting the demanding and time-sensitive nature to  
28 understand how the COVID-19 pandemic affect individuals. Unsurprisingly, encyclopaedias  
29 (n= 5) scored the highest in content (10.80), identification (4.80) domains and overall EQIP  
30 (24.20), holding the highest proportion of websites discussing both prevention and treatment  
31  
32  
33  
34  
35  
36  
37  
38  
39  
40  
41  
42  
43  
44  
45  
46  
47  
48  
49  
50  
51  
52  
53  
54  
55  
56  
57  
58  
59  
60

1  
2  
3 (n=4; 80%). Encyclopaedias' high scores are attained through their endeavours to provide  
4 neutral summaries meeting the majority of the EQIP criterion.[45] Nonetheless, while overall  
5 EQIP scores do not differ substantially from existing literature, it is important to recognise  
6 that the quality of information assessed is significantly influenced by the rapid turnover of  
7 information, a phenomenon not present in other comparable studies.  
8  
9  
10  
11  
12

13  
14  
15 JAMA benchmark scores, unlike EQIP and DISCERN, were more consistent as only four  
16 points are available. Hence, high-scoring websites often fulfilled all four criteria while the  
17 majority of remaining entries scored two or three. Low-scoring websites scored significantly  
18 lower ( $P<0.001$ ) in Authorship and Attribution, with only 44.13% and 17.81% fulfilling the  
19 criteria, reflecting congruence with the findings from EQIP regarding bibliography inclusion.  
20 Contrarily, website ownership and funding assessment, under Disclosure, (86.23%) and  
21 assessments of publishing and updating dates, under Currency (81.78%), varied to a lesser  
22 degree, albeit still scoring significantly lower ( $P<0.001$ ). Comparative to the related EQIP  
23 sections, Disclosure and Currency likely scored better by assessing attributes separate to  
24 the content itself. Professional societies (n= 4; 3.50), closely followed by encyclopaedias  
25 (n=5; 3.40), scored the highest (scored highest what?), whereas the mean JAMA scores  
26 were only 2.69, with four websites scoring zero. This is likely attributable to the lack of  
27 additional assessment criteria by the JAMA benchmark due to JAMA's development during a  
28 time of rudimentary online resources. Regardless, the tool is still effective at identifying high-  
29 quality content as high-scoring websites scored significantly better across each item  
30 ( $P<0.001$ ).  
31  
32  
33  
34  
35  
36  
37  
38  
39  
40  
41  
42  
43  
44  
45  
46  
47  
48  
49  
50

51 DISCERN's mean score of 38.0 across 16 items averaged 2.38 out of five per item. The  
52 DISCERN handbook details a rating of one when the information does not provide the  
53 appropriate information, three where it addresses it partially and five for a complete and  
54 adequate inclusion. Based on these guidelines, the majority of websites meet the listed  
55 criteria to a minimal extent. Similar to EQIP, DISCERN scores vary significantly, ranging 19  
56  
57  
58  
59  
60

1  
2  
3 to 75 with a majority distributed within 25 to 47. Of the 16 items, 12 presented statistically  
4 significant differences between high- and low-scoring websites. Interestingly, the Reliability  
5 section provided the greatest difference in scoring, seen between item 4, clear display of  
6 information sources (mean 4.16 vs 2.55;  $P=0.019$ ), and item 5, a clear indication of where  
7 sources were used (mean 3.54 vs 2.28;  $P=0.007$ ). This corroborates with results from EQIP  
8 and JAMA assessments, highlighting the inadequacies of informative material production.

9  
10  
11  
12  
13  
14  
15  
16  
17  
18  
19  
20  
21  
22  
23  
24  
25  
26  
27  
28  
29  
30  
31  
32  
33  
34  
35  
36  
37  
38  
39  
40  
41  
42  
43  
44  
45  
46  
47  
48  
49  
50  
51  
52  
53  
54  
55  
56  
57  
58  
59  
60  
Quality of treatment information scores varied less, albeit all statistically significant, with  
largest differences observed between item 9, describing how each treatment works (1.76 vs  
1.43;  $P=0.005$ ) and item 10, detailing treatment benefits (1.78 vs 1.43;  $P<0.001$ ). Despite  
accommodating for the treatment uncertainty during the assessment, almost all items  
evaluating treatment scored poorly, including high-scoring websites, and may be reflective of  
its lower journalistic priority or demand as we also found the majority of websites tailored  
towards discussing prevention. As a whole, DISCERN scores specifically addressing  
treatment options were poor, scoring 45.07 (SD 11.68) for websites that only discuss  
treatment as well as 42.84 (SD 10.93) for websites that discuss both prevention and  
treatment. These scores are also lower than those of other DISCERN studies, which have  
mean scores between 45.8 and 56.1, with SD between 8.76 and 13.6.[46–48] While the  
majority of websites DISCERN scores were low, they scored similarly in Reliability section.  
The mean scores for items 1,2 and 3 were the highest of all indicators, averaging 4.37, 4.29  
and 4.33, whereas treatment section scored between 1 and 2, with a maximum of 1.66. The  
treatment section of DISCERN shows much more variation, with prevention alone (8.60;  
 $n=202$ ) scoring lowest, treatment alone (18.09;  $n=46$ ) scoring highest and websites  
discussing both (13.47;  $n=73$ ) in between. This suggests that many websites do not include  
treatment information and, of those that do, websites tend to avoid discussion rather than  
provide the limited information available.

In short, all three tools utilised here are validated based on international recommendations  
and provides a comprehensive assessment of online information: EQIP delivers an all-

1  
2  
3 rounded evaluation of health information, DISCERN excels at scrutinising treatment and  
4 JAMA benchmark assesses all of a website's content as a whole. Additionally, as design  
5 alone is known to improv perception of information credibility[49], the higher emphasis on  
6 quality of content in EQIP and DISCERN will likely prevent well-presented and user-friendly  
7 websites with poor content from attaining high scores over poorly-presented websites with  
8 good content. Altogether the tools suggest that the majority of COVID-19 websites are  
9 generally of poor quality and that quality fluctuates highly. The need to improve public  
10 awareness and education exist and through these tools, expectations can be held across  
11 different sources of information. This may subsequently impair the ability of the public to filter  
12 out websites of low validity and reliability and, hence, increase their risk of unsafe health  
13 behaviours during the pandemic.  
14  
15  
16  
17  
18  
19  
20  
21  
22  
23  
24  
25  
26  
27

### 28 **Reasons for poor quality information**

29  
30 Most sources scored poorly due to several possible reasons. Firstly, as COVID-19 was only  
31 identified in early December 2019[50] and recognised as a pandemic in March 2020[51], the  
32 general lack of information from which to produce patient information prevents accurate and  
33 reliable conclusions to be drawn. While research efforts have since gained traction,  
34 production of research, reviewing and publication is a lengthy process comparative to the  
35 rapid spread of COVID-19. Journals have since implemented fast-tracking of COVID-19  
36 research.[52–54] Similarly, Governments and Health Departments have also cooperated to  
37 support and fast-track COVID-19 studies.[55] The combined efforts have facilitated the  
38 publication of over 5,000 COVID-19 articles in the WHO database alone.[56] It is also  
39 important to note the role of preprint servers during the pandemic as they are accessible to  
40 the public. While improving accessibility helps facilitate peer-reviewing; non-peer-reviewed  
41 articles can potentially be used, or cherry-picked, by non-professionals which can adversely  
42 affect public understanding.[57–60]  
43  
44  
45  
46  
47  
48  
49  
50  
51  
52  
53  
54  
55  
56  
57  
58  
59  
60

1  
2  
3 Health literacy plays a crucial role in how COVID-19 information influences health behaviour.  
4  
5 The associations between health literacy and health behaviour are well documented, with  
6  
7 low literacy common among older adults with poor health behaviour ( $P < 0.005$ ) ranging from  
8  
9 lifestyles, such as physical activity, dietary habits and obesity, to social factors, such as  
10  
11 loneliness and social isolation.[61–63] The effects of primary preventative measures, such  
12  
13 as social distancing, self-isolation and other hygiene recommendations, may become  
14  
15 impaired by the abundance of poorly written and incorrect information online. In particular,  
16  
17 the elderly, most vulnerable population, suffer from even higher risks due to their lower  
18  
19 health literacy.[64] Although health literacy, and by extension, health behaviours, can be  
20  
21 improved through education[65], effective dissemination of credible information is critical  
22  
23 during the pandemic. The public, and journalists, need to exercise caution when accessing  
24  
25 research and pre-prints during this period as inadequate health literacy may lead to  
26  
27 counterproductive effects. Similarly, mass production of online information greatly increases  
28  
29 the difficulty in distinguishing reliable information from the sea of misinformation, and hence,  
30  
31 a greater emphasis must be placed on authors and journalists to deliver unbiased, credible  
32  
33 and accurate information to the public.[66,67]  
34  
35  
36  
37  
38

39 Upon publication, articles are reviewed and summarised by journalists who bridges the  
40  
41 knowledge gap between scientists and the wider public. This allows efficient dissemination  
42  
43 of critical research to those who lack the scientific background to critically appraise and  
44  
45 evaluate research. Notably, while 52% ( $n=169$ ) of websites were 'News Services', only 12  
46  
47 (7.1%) were considered high-scoring, reflecting that very few provide a comprehensive  
48  
49 account of COVID-19 information, possibly explained by the difficulty in matching the pace of  
50  
51 COVID-19 research and technical inadequacies in delivering accurate and concise scientific  
52  
53 information. As health information-seeking behaviour of the public will likely be based on  
54  
55 news services[68], the highly variable and generally poor content is problematic.  
56  
57  
58  
59  
60

1  
2  
3 Previous studies have identified many health journalists lack the training required to  
4 accurately disseminate health news, leading to potentially harmful health effects.[69,70] The  
5 low scores across all tools indicate overall inadequacy of both reliability and accuracy. A  
6 survey of medical journalists across 37 countries highlighted the 3 most common barriers  
7 against quality content: lack of time, space and knowledge.[71] While journalism stresses the  
8 ability to summarise content quickly and concisely, experienced journalists often report the  
9 lack of knowledge as a barrier. The lack of expert knowledge in a rapidly progressing  
10 scientific field can impact the quality of conveyed information significantly. Furthermore,  
11 journalists reported difficulty in finding experts to explain jargon, further impacting quality.  
12 This presents a large barrier towards disseminating quality COVID-19 information as the  
13 redirected efforts of many countries and institutions' scientists into research reduces  
14 availability to assist with medical journalism. [72,73] Expertise in a relevant academic  
15 background likely helps improve the content, as indicated by the highest-scoring entry,  
16 whose author holds a PhD in molecular genetics which scoring 22 in EQIP, 4 in JAMA and  
17 74 in DISCERN.[74] In short, our findings highlight the importance of addressing health  
18 outcomes through health literacy of both the public and authors.

19  
20  
21  
22  
23  
24  
25  
26  
27  
28  
29  
30  
31  
32  
33  
34  
35  
36  
37  
38  
39 Our analysis identified the majority of websites as sources from Governments or health  
40 departments across various states of the USA, many of which have based information and  
41 advice from the Centers for Disease Control and Prevention (CDC). As both the nature and  
42 purpose of these sources vary, the visiting population and demographics would similarly vary  
43 due to different information-seeking behaviours. A recent study has identified a deficit of  
44 awareness and trust in information originating from the Government such as those of the  
45 CDC, revealing that while up to 83.6% of American adults are aware of the CDC, only 64.6%  
46 trust this source.[75] American adolescents were, however, less aware of the CDC (55.8%),  
47 but were more trusting of their information (72.2%). As previously established, the trust in a  
48 government is a predictor of health outcome as it affects behaviours such as service usage  
49 and vaccination rates. [76–78] Similarly, as access and usage of online health information  
50  
51  
52  
53  
54  
55  
56  
57  
58  
59  
60

1  
2  
3 vary between different demographic populations, it is paramount we create and provide  
4 targeted and effective educational material for public use.[79,80]  
5  
6  
7  
8

9  
10 A comparison between the global Government/Health Department and News Services  
11 websites revealed significant differences between EQIP Content, Total EQIP, Total and  
12 DISCERN Treatment. The EQIP Content scores reflect differences in information retrieval  
13 methods between Government/Health Departments' using primary research for more in-  
14 depth accurate information dissemination, and journalists utilising secondary research.  
15  
16 However, News Services scored higher in DISCERN Treatment, potentially due to the  
17 Government's reluctance to prematurely disclose treatment information at early stages of  
18 discovery, whereas journalists may freely report results of all potential studies. Interestingly,  
19 the majority of USA Government websites had some form of copy-pasted information from  
20 the Centre for Disease Control and Prevention (CDC), likely with the aim of maintaining  
21 consistency and centralisation information sources. In contrast, the majority of other sources  
22 rewrite information based on a variety of sources. American sources display a similar pattern  
23 of variation but the EQIP Identification scores of Government/Health Departments show  
24 statistically significant differences, scoring lower than News Services (mean 3.34 vs 3.78;  
25 P=0.011). Verbatim use of CDC information on these Government websites may have  
26 neglected the importance of clarity and transparency, discarding justification and critical  
27 appraisal of available literature and focusing on information dissemination instead.  
28  
29  
30  
31  
32  
33  
34  
35  
36  
37  
38  
39  
40  
41  
42  
43  
44  
45  
46  
47

#### 48 **Is the current information online adequate?**

49 Google Trends identified search popularity of treatment to have increased rapidly,  
50 outgrowing prevention searches since early-March. This suggests that initial demands for  
51 preventative information have been sufficiently met and interests now shift towards  
52 treatment. The 275 websites addressing prevention scored below the mean EQIP (17.12 vs  
53 17.78; P<0.001), JAMA (2.53 vs 2.69; P=0.001) and DISCERN scores (34.64 vs 38.00;  
54 P<0.001), showing that quality of preventative information remains subpar across all quality  
55  
56  
57  
58  
59  
60



1  
2  
3 indicators. Similarly, websites demonstrated their efficacy in sourcing over discussing  
4 information, excelling in Identification (3.87 vs 3.50;  $P<0.001$ ), as a treatment alone (46%)  
5 scored below the mean in EQIP (16.89 vs 17.78;  $P<0.001$ ). This is also reflected by its  
6 above-average JAMA (3.13 vs 2.69;  $P=0.001$ ) and DISCERN (45.07 vs 38.00;  $P<0.001$ )  
7 scores. Contrarily, the 73 websites that discussed both treatment and prevention of COVID-  
8 19 consistently scored higher than the mean across all indicators: EQIP (20.15 vs 17.78;  
9  $P<0.001$ ), JAMA (2.85 vs 2.69;  $P=0.001$ ) and DISCERN (42.84 vs 38.00;  $P<0.001$ ). These  
10 websites explored multiple aspects of the virus, likely utilising a variety of sources, thus  
11 producing a higher quality article through a better understanding of the topic. To combat  
12 increasingly dangerous COVID-19 myths, such as injection of disinfectants as treatment,  
13 continued maintenance and improvement to online available resources is paramount.[81,82]  
14  
15  
16  
17  
18  
19  
20  
21  
22  
23  
24  
25  
26  
27  
28

### 29 **Limitations**

30 Although our utilised search engine, 'Google', is the most commonly used, it is not wholly  
31 representative as searches are often affected by the location of the requesting server and  
32 previous Internet usage. While querying from every country is not practical, the utilised  
33 server has not conducted any other COVID-19 searches, thus impact should be minimised.  
34 A further search was conducted on 10<sup>th</sup> July 2020 on the top 10 scoring EQIP and DISCERN  
35 websites through VPN servers in Texas, London, Toronto and Sydney. Only three of the  
36 websites were found within the first 10 pages of results using the same search-terms on the  
37 original server, with London and Sydney returning two of the results, Toronto returning none  
38 (**Supplementary Table 4**) and the remaining URL redirecting to another page. The search  
39 also confirms differences in results between the location of the search, however, all three  
40 results from the Texas server were covered by London and Sydney. As websites can be  
41 updated or removed any time, our results are representative only at the time of the search,  
42 demonstrated by the distinct lack of the original websites in July. Similarly, search-terms  
43 obtained using 'Google Adwords Keyword Planner' and 'Google Trends', may not truly be  
44 indicative of search patterns of the wider public. Hence, 12 different variations of 'COVID-19'  
45  
46  
47  
48  
49  
50  
51  
52  
53  
54  
55  
56  
57  
58  
59  
60



1  
2  
3 names and phrases potentially used by patients were utilised as search-terms. As  
4  
5 popularised social media is in sharing health information, our study focused on search  
6  
7 engines because previous studies have identified a lacking trust in social media information  
8  
9 responsible, developing subsequent barriers towards public engagement.[83] Similarly, while  
10  
11 video-based information constitutes a valuable source of information, no tools have been  
12  
13 validated in assessing video-based information, particularly for COVID-19, to the best of our  
14  
15 knowledge. Forced inclusion of video content would likely yield inaccurately low scores  
16  
17 across current tools as videos typically do not include as much written information. Another  
18  
19 limitation is the exclusion of non-English language websites, especially reducing the  
20  
21 representation of publicly available information given the international nature of the  
22  
23 pandemic. A minority of URLs, particularly of News Services, regularly update their content  
24  
25 or redirect visitors, potentially affecting the second round of evaluation and subsequent  
26  
27 statistical analysis. Additionally, modified EQIP tool, JAMA benchmark and DISCERN tool  
28  
29 were limited as they were not designed to specifically assess the highly variable information  
30  
31 produced during pandemics. However, the EQIP tool was designed to assess any type of  
32  
33 patient information and demonstrated high inter-rater reliability.[16] Similarly, JAMA  
34  
35 benchmark was designed to evaluate website reliability alone and DISCERN examines both  
36  
37 reliability and content accuracy, thus, the combinational use of tools enhances the accuracy  
38  
39 and objective assessment of websites.  
40  
41  
42  
43  
44

## 45 **Conclusion**

46  
47 In short, the abundance of Internet resources providing COVID-19 information is exemplified  
48  
49 by the numerous identified websites during our search. The information available to the  
50  
51 public may affect their health decisions, which, subsequently, affects the efficacy and  
52  
53 outcome of public health measures implemented by the state. As effective treatments and  
54  
55 vaccines research is underway, COVID-19 is primarily addressed with preventative  
56  
57 measures, hence necessitating a critical review of the quality and nature of the information  
58  
59 accessible to the public. Our results demonstrated that the websites were chiefly produced  
60

1  
2  
3 by News Services and Government/Health Departments but were nonetheless of low quality.  
4  
5 While the majority of websites addressed prevention, and likely met the information needs of  
6  
7 the public as reflected by search trends, there is a relative deficit in websites that discuss  
8  
9 treatment methods. A minority of websites discussed both prevention methods and  
10  
11 treatment and were generally good resources but the majority websites were of inadequate  
12  
13 quality. Thus, there is a need for higher quality for online COVID-19 resources to facilitate  
14  
15 public education and enable better cooperation and outcomes of public health measures.  
16  
17  
18  
19  
20  
21  
22  
23  
24  
25  
26  
27  
28  
29  
30  
31  
32  
33  
34  
35  
36  
37  
38  
39  
40  
41  
42  
43  
44  
45  
46  
47  
48  
49  
50  
51  
52  
53  
54  
55  
56  
57  
58  
59  
60

For peer review only

**Contributorship statement**

Study conception and design: DAR, NM, SAG, KSF

Acquisition of data: SAG, KSF, LL, KHF, DR, AS

Analysis and interpretation of data: KSF, SAG, NM, DAR

Drafting of manuscript: KSF, SAG, NM, KHF

Critical revision: KSF, SAG, NM, DAR

**Competing interests**

Authors have declared that no competing interests exist.

**Funding**

Authors received no specific funding for this work.

**Data sharing statement**

All relevant data are within this manuscript and supplementary files.

## Bibliography

- 1 Clarke MA, Moore JL, Steege LM, *et al.* Health information needs, sources, and  
2 barriers of primary care patients to achieve patient-centered care: A literature review.  
3  
4  
5  
6  
7  
8  
9  
10  
11  
12  
13  
14  
15  
16  
17  
18  
19  
20  
21  
22  
23  
24  
25  
26  
27  
28  
29  
30  
31  
32  
33  
34  
35  
36  
37  
38  
39  
40  
41  
42  
43  
44  
45  
46  
47  
48  
49  
50  
51  
52  
53  
54  
55  
56  
57  
58  
59  
60
- 1 Clarke MA, Moore JL, Steege LM, *et al.* Health information needs, sources, and  
barriers of primary care patients to achieve patient-centered care: A literature review.  
*Health Informatics J* 2016;**22**:992–1016. doi:10.1177/1460458215602939
- 2 Tan SS-L, Goonawardene N. Internet Health Information Seeking and the Patient-  
Physician Relationship: A Systematic Review. *J Med Internet Res* 2017;**19**.  
doi:10.2196/jmir.5729
- 3 Semigran HL, Linder JA, Gidengil C, *et al.* Evaluation of symptom checkers for self  
diagnosis and triage: audit study. *BMJ* 2015;**351**:h3480–h3480.  
doi:10.1136/bmj.h3480
- 4 Alduraywish SA, Altamimi LA, Aldhuwayhi RA, *et al.* Sources of Health Information  
and Their Impacts on Medical Knowledge Perception Among the Saudi Arabian  
Population: Cross-Sectional Study. *J Med Internet Res* 2020;**22**. doi:10.2196/14414
- 5 Vogel L. Viral misinformation threatens public health. *Can Med Assoc J*  
2017;**189**:E1567–E1567. doi:10.1503/cmaj.109-5536
- 6 British Medical Journal. Health information on internet is often unreliable. *BMJ Br  
Med J* 2000;**321**:136.
- 7 Silver MP. Patient perspectives on online health information and communication with  
doctors: a qualitative study of patients 50 years old and over. *J Med Internet Res*  
2015;**17**:e19–e19. doi:10.2196/jmir.3588
- 8 World Health Organization. Coronavirus disease 2019.  
<https://www.who.int/emergencies/diseases/novel-coronavirus-2019> (accessed 30 Apr  
2020).
- 9 World Health Organization. WHO announces COVID-19 outbreak a pandemic.  
2020.<http://www.euro.who.int/en/health-topics/health-emergencies/coronavirus-covid-19/news/news/2020/3/who-announces-covid-19-outbreak-a-pandemic> (accessed 30  
Apr 2020).
- 10 World Health Organization. COVID-19 Strategy Update. 2020.

- 1  
2  
3 [https://www.who.int/docs/default-source/coronaviruse/covid-strategy-update-](https://www.who.int/docs/default-source/coronaviruse/covid-strategy-update-14april2020.pdf?sfvrsn=29da3ba0_19)  
4 [14april2020.pdf?sfvrsn=29da3ba0\\_19](https://www.who.int/docs/default-source/coronaviruse/covid-strategy-update-14april2020.pdf?sfvrsn=29da3ba0_19) (accessed 30 Apr 2020).  
5  
6  
7  
8 11 Feldmann H. Ebola — A Growing Threat? *N Engl J Med* 2014;**371**:1375–8.  
9  
10 doi:10.1056/NEJMp1405314  
11  
12 12 Odlum M, Yoon S. Health Information Needs and Health Seeking Behavior During the  
13 2014-2016 Ebola Outbreak: A Twitter Content Analysis. *PLoS Curr* 2018;**10**.  
14  
15 doi:10.1371/currents.outbreaks.fa814fb2bec36e29b718ab6af66124fa  
16  
17  
18 13 Gilbert D. Which countries are under lockdown - and is it working?  
19  
20 2020.[https://www.telegraph.co.uk/news/2020/04/16/countries-in-lockdown-denmark-](https://www.telegraph.co.uk/news/2020/04/16/countries-in-lockdown-denmark-germany/)  
21 [germany/](https://www.telegraph.co.uk/news/2020/04/16/countries-in-lockdown-denmark-germany/) (accessed 30 Apr 2020).  
22  
23  
24 14 British Broadcasting Company. Coronavirus lockdown protest: What's behind the US  
25 demonstrations? - BBC News. 2020.[https://www.bbc.co.uk/news/world-us-canada-](https://www.bbc.co.uk/news/world-us-canada-52359100)  
26 [52359100](https://www.bbc.co.uk/news/world-us-canada-52359100) (accessed 30 Apr 2020).  
27  
28  
29  
30 15 Elwyn G, O'Connor A, Stacey D, *et al*. Developing a quality criteria framework for  
31 patient decision aids: online international Delphi consensus process. *Bmj-British Med*  
32 *J* 2006;**333**:417–9. doi:10.1136/bmj.38926.629329.AE  
33  
34  
35  
36 16 Zuk G, Palma AF, Eylert G, *et al*. Systematic Review of Quality of Patient Information  
37 on Liposuction in the Internet. *Plast Reconstr Surgery-Global Open* 2016;**4**.  
38  
39 doi:10.1097/gox.0000000000000798  
40  
41  
42  
43 17 Raptis DA, Sinanyan M, Ghani S, *et al*. Quality assessment of patient information on  
44 the management of gallstone disease in the internet – A systematic analysis using the  
45 modified ensuring quality information for patients tool. *HPB* 2019;**21**:1632–40.  
46  
47  
48  
49  
50  
51  
52 18 McCool ME, Wahl J, Schlecht I, *et al*. Evaluating written patient information for  
53 eczema in German: Comparing the reliability of two instruments, DISCERN and EQIP.  
54  
55 *PLoS One* 2015;**10**. doi:10.1371/journal.pone.0139895  
56  
57  
58 19 Vetter D, Ruhwinkel H, Raptis DA, *et al*. Quality Assessment of Information on  
59 Bariatric Surgery Websites. *Obes Surg* 2018;:1–8.  
60

- 1  
2  
3 20 Zuk G, Reinisch KB, Raptis DA, *et al.* Dupuytren Disease: Is There Enough  
4 Comprehensive Patient Information on the Internet? *Interact J Med Res* 2017;**6**:e7.  
5  
6 doi:10.2196/ijmr.7822  
7  
8  
9 21 Frueh FS, Palma AF, Raptis DA, *et al.* Carpal tunnel syndrome: Analysis of online  
10 patient information with the EQIP tool. *Chir Main* 2015;**34**:113–21.  
11  
12 doi:10.1016/j.main.2015.04.003  
13  
14  
15 22 Palma AF, Zuk G, Raptis DA, *et al.* Quality of information for women seeking breast  
16 augmentation in the Internet. *J Plast Surg Hand Surg* 2016;**50**:262–71.  
17  
18 doi:10.3109/2000656X.2016.1154469  
19  
20  
21 23 Melloul E, Raptis DA, Oberkofler CE, *et al.* Donor information for living donor liver  
22 transplantation: Where can comprehensive information be found? *Liver Transplant*  
23 2012;**18**:892–900. doi:10.1002/lt.23442  
24  
25  
26  
27 24 Minervation. The LIDA Instrument Minervation validation instrument for health care  
28 web sites Full Version (1.2) containing instructions. 2007.  
29  
30 www.minervation.com/validation (accessed 30 Apr 2020).  
31  
32  
33 25 Coughler C, M Burke S, Cardy JO. Analysis of the quality of online resources for  
34 parents of children who are late to talk. *Autism Dev Lang Impair*  
35 2020;**5**:239694152091794. doi:10.1177/2396941520917940  
36  
37  
38  
39 26 Kher A, Johnson S, Griffith R. Readability assessment of online patient education  
40 material on congestive heart failure. *Adv Prev Med* 2017;**2017**.  
41  
42  
43  
44 27 Corcelles R, Daigle CR, Talamas HR, *et al.* Assessment of the quality of Internet  
45 information on sleeve gastrectomy. *Surg Obes Relat Dis* 2015;**11**:539–44.  
46  
47 doi:10.1016/j.soard.2014.08.014  
48  
49  
50 28 Sobota A, Ozakinci G. The quality and readability of online consumer information  
51 about gynecologic cancer. *Int J Gynecol Cancer* 2015;**25**:537–41.  
52  
53 doi:10.1097/IGC.0000000000000362  
54  
55  
56 29 The eBusiness. Top 15 Best Search Engines | February 2020.  
57  
58  
59  
60 <http://www.ebizmba.com/articles/search-engines> (accessed 30 Apr 2020).

- 1  
2  
3 30 Search Engine Watch. Google Hits the Billion Monthly Unique Visitors Mark.  
4  
5 2011;**2020**.[https://www.searchenginewatch.com/2011/06/23/google-hits-the-billion-](https://www.searchenginewatch.com/2011/06/23/google-hits-the-billion-monthly-unique-visitors-mark/)  
6  
7 monthly-unique-visitors-mark/  
8  
9  
10 31 Google. <https://www.google.com/> (accessed 30 Apr 2020).  
11  
12 32 Google. Google Ads - Get More Customers With Easy Online Advertising.  
13  
14 [https://ads.google.com/intl/en\\_GB/home/](https://ads.google.com/intl/en_GB/home/) (accessed 30 Apr 2020).  
15  
16 33 Google. Google Trends. <https://trends.google.com/trends>  
17  
18 34 Moulton B, Franck LS, Brady H. Ensuring quality information for patients: development  
19 and preliminary validation of a new instrument to improve the quality of written health  
20 care information. *Health Expect* 2004;**7**:165–75. doi:10.1111/j.1369-  
21 7625.2004.00273.x  
22  
23  
24  
25  
26 35 Charvet-Berard AI, Chopard P, Perneger T V. Measuring quality of patient information  
27 documents with an expanded EQIP scale. *Patient Educ Couns* 2008;**70**:407–11.  
28 doi:10.1016/j.pec.2007.11.018  
29  
30  
31  
32 36 British Medical Association. BMA Patient Information Awards, .  
33  
34 2018;**2018**.<https://www.bma.org.uk/library/patient-information-awards>  
35  
36  
37 37 International Patient Decision Aid Standards Collaboration. IPDAS Collaboration  
38 Background Document. 2005;**2018**.[http://ipdas.ohri.ca/IPDAS\\_Background.pdf](http://ipdas.ohri.ca/IPDAS_Background.pdf)  
39  
40  
41 38 Silberg WM, Lundberg GD, Musacchio RA. Assessing, controlling, and assuring the  
42 quality of medical information on the Internet: Caveant lector et viewer—Let the  
43 reader and viewer beware. *JAMA* 1997;**277**:1244–5.  
44  
45  
46  
47 39 Janssen S, Fahlbusch FB, Kaesmann L, *et al*. Radiotherapy for prostate cancer:  
48 DISCERN quality assessment of patient-oriented websites in 2018. *Bmc Urol*  
49 2019;**19**. doi:10.1186/s12894-019-0474-4  
50  
51  
52  
53 40 Borgmann H, Wölm J-H, Vallo S, *et al*. Prostate Cancer on the Web—Expedient Tool  
54 for Patients' Decision-Making? *J Cancer Educ* 2017;**32**:135–40.  
55  
56  
57 41 Charnock D, Shepperd S, Needham G, *et al*. DISCERN: an instrument for judging the  
58 quality of written consumer health information on treatment choices. 1998.  
59  
60

- 1  
2  
3 42 Nghiem AZ, Mahmoud Y, Som R. Evaluating the quality of internet information for  
4 breast cancer. *Breast* 2016;**25**:34–7. doi:10.1016/j.breast.2015.10.001  
5  
6  
7 43 Raptis DA. rBiostatistics.com (alpha version) | rBiostatistics.com.  
8  
9  
10 https://www.rbiostatistics.com/ (accessed 30 Apr 2020).  
11  
12 44 Karamitros GA, Kitsos NA. Clefts of the lip and palate: is the Internet a trustworthy  
13 source of information for patients? *Int J Oral Maxillofac Surg* 2018;**47**:1114–20.  
14  
15  
16 doi:10.1016/j.ijom.2018.03.003  
17  
18 45 Sanger L. Wikipedia Policy.  
19  
20 2001.http://en.wikipedia.org/w/index.php?title=Wikipedia\_policy&direction=next&oldid  
21  
22 =68263 (accessed 10 Jul 2020).  
23  
24 46 Som R, Gunawardana NP. Internet chemotherapy information is of good quality:  
25 Assessment with the DISCERN tool. *Br J Cancer* 2012;**107**:403.  
26  
27  
28 doi:10.1038/bjc.2012.223  
29  
30 47 Kaicker J, Debono VB, Dang W, *et al.* Assessment of the quality and variability of  
31 health information on chronic pain websites using the DISCERN instrument. *BMC*  
32  
33  
34 *Med* 2010;**8**:59. doi:10.1186/1741-7015-8-59  
35  
36  
37 48 Jaffe J, Tonick S, Angell N. Quality of Web-Based Information on Epidural  
38 Anesthesia. *Obstet Gynecol* 2014;**123**:115S.  
39  
40  
41 doi:10.1097/01.aog.0000447063.32706.46  
42  
43 49 Sbaffi L, Rowley J. Trust and Credibility in Web-Based Health Information: A Review  
44 and Agenda for Future Research. *J Med Internet Res* 2017;**19**. doi:10.2196/jmir.7579  
45  
46  
47 50 World Health Organization. WHO | Novel Coronavirus – China.  
48 2020.https://www.who.int/csr/don/12-january-2020-novel-coronavirus-china/en/  
49  
50  
51 (accessed 30 Apr 2020).  
52  
53 51 World Health Organization. Statement on the second meeting of the International  
54 Health Regulations (2005) Emergency Committee regarding the outbreak of novel  
55 coronavirus (2019-nCoV). 2020.https://www.who.int/news-room/detail/30-01-2020-  
56  
57  
58 statement-on-the-second-meeting-of-the-international-health-regulations-(2005)-  
59  
60



- 1  
2  
3 emergency-committee-regarding-the-outbreak-of-novel-coronavirus-(2019-ncov)  
4  
5 (accessed 30 Apr 2020).  
6  
7  
8 52 COVID-19 Updates. <https://plos.org/covid-19/> (accessed 30 Apr 2020).  
9  
10 53 Elsevier. COVID-19 Update - Elsevier. [https://www.journals.elsevier.com/journal-of-](https://www.journals.elsevier.com/journal-of-critical-care/covid-19)  
11 [critical-care/covid-19](https://www.journals.elsevier.com/journal-of-critical-care/covid-19) (accessed 30 Apr 2020).  
12  
13  
14 54 Anesthesia & Analgesia. Call for Papers: Coronavirus Disease 2019 (COVID-19).  
15 <https://journals.lww.com/anesthesia-analgesia/Pages/CFPCOVID19.aspx> (accessed  
16 30 Apr 2020).  
17  
18  
19  
20 55 National Health Service Health Research Authority. COVID-19 research - Health  
21 Research Authority. <https://www.hra.nhs.uk/covid-19-research/> (accessed 30 Apr  
22 2020).  
23  
24  
25  
26 56 World Health Organization. COVID-19: Global literature on coronavirus disease.  
27 <https://search.bvsalud.org/global-literature-on-novel-coronavirus-2019-ncov/>  
28 (accessed 30 Apr 2020).  
29  
30  
31  
32  
33 57 Majumder MS, Mandl KD. Early in the epidemic: impact of preprints on global  
34 discourse about COVID-19 transmissibility. *Lancet Glob Heal* 2020.  
35  
36  
37 58 Pradhan P, Pandey AK, Mishra A, *et al*. Uncanny similarity of unique inserts in the  
38 2019-nCoV spike protein to HIV-1 gp120 and Gag. *BioRxiv* 2020.  
39  
40  
41 59 Liu DWC. Science Denial and the Science Classroom. *Cbe-Life Sci Educ*  
42 2012;**11**:129–34. doi:10.1187/cbe.12-03-0029  
43  
44  
45 60 Altmetric – Uncanny similarity of unique inserts in the 2019-nCoV spike protein to  
46 HIV-1 gp120 and Gag. <https://www.altmetric.com/details/74957328> (accessed 30 Apr  
47 2020).  
48  
49  
50  
51 61 Reisi M, Javadzade SH, Heydarabadi AB, *et al*. The relationship between functional  
52 health literacy and health promoting behaviors among older adults. *J Educ Health*  
53 *Promot* 2014;**3**:119. doi:10.4103/2277-9531.145925  
54  
55  
56  
57 62 Geboers B, Reijneveld SA, Jansen CJM, *et al*. Health Literacy Is Associated With  
58 Health Behaviors and Social Factors Among Older Adults: Results from the LifeLines  
59  
60

- 1  
2  
3 Cohort Study. *J Health Commun* 2016;**21**:45–53.  
4  
5 doi:10.1080/10810730.2016.1201174  
6  
7 63 Husson O, Mols F, Fransen MP, *et al.* Low subjective health literacy is associated  
8 with adverse health behaviors and worse health-related quality of life among  
9 colorectal cancer survivors: Results from the profiles registry. *Psychooncology*  
10 2015;**24**:478–86. doi:10.1002/pon.3678  
11  
12  
13  
14  
15 64 Chesser AK, Keene Woods N, Smothers K, *et al.* Health Literacy and Older Adults.  
16 *Gerontol Geriatr Med* 2016;**2**:233372141663049. doi:10.1177/2333721416630492  
17  
18  
19 65 Bay JL, Vickers MH, Mora HA, *et al.* Adolescents as agents of healthful change  
20 through scientific literacy development: A school-university partnership program in  
21 New Zealand. *Int J STEM Educ* 2017;**4**. doi:10.1186/s40594-017-0077-0  
22  
23  
24  
25 66 Barel-ben David Y, Garty ES, Baram-tsabari A. Can scientists fill the science  
26 journalism void ? Online public engagement with science stories authored by  
27 scientists. 2020;:1–15.  
28  
29  
30  
31  
32 67 Lazer BDMJ, Baum MA, Benkler Y, *et al.* The science of fake news. 2018.  
33  
34  
35 68 Longo DR. Understanding health information, communication, and information  
36 seeking of patients and consumers: a comprehensive and integrated model. *Heal*  
37 *Expect* 2005;**8**:189–94.  
38  
39  
40  
41 69 Keshvari M, Yamani N, Adibi P, *et al.* Health journalism: Health reporting status and  
42 challenges. *Iran J Nurs Midwifery Res* 2018;**23**:14.  
43  
44  
45 70 Schwitzer G. How do US journalists cover treatments, tests, products, and  
46 procedures? An evaluation of 500 stories. *PLoS Med* 2008;**5**.  
47  
48  
49 71 Larsson A, Oxman AD, Carling C, *et al.* Medical messages in the media—barriers and  
50 solutions to improving medical journalism. *Heal Expect* 2003;**6**:323–31.  
51  
52  
53 72 Cattani M. Global coalition to accelerate COVID-19 clinical research in resource-  
54 limited settings. *Lancet* 2020.  
55  
56  
57 73 ST. George's University of London. 3 April: 2020 Covid-19 response — our role in  
58 tackling the pandemic. <https://www.sgul.ac.uk/news/alerts/bulletins/3-april-2020>  
59  
60

- (accessed 30 Apr 2020).
- 74 Saey Tina Hesman. Repurposed drugs may help scientists fight the new coronavirus. 2020. doi:10.1101/2020.01.28.922922V2
- 75 Kowitt SD, Schmidt AM, Hannan A, *et al.* Awareness and trust of the FDA and CDC: Results from a national sample of US adults and adolescents. *PLoS One* 2017;**12**.
- 76 Bish A, Yardley L, Nicoll A, *et al.* Factors associated with uptake of vaccination against pandemic influenza: a systematic review. *Vaccine* 2011;**29**:6472–84.
- 77 Whetten K, Leserman J, Whetten R, *et al.* Exploring lack of trust in care providers and the government as a barrier to health service use. *Am J Public Health* 2006;**96**:716–21.
- 78 Quinn SC, Parmer J, Freimuth VS, *et al.* Exploring communication, trust in government, and vaccination intention later in the 2009 H1N1 pandemic: results of a national survey. *Biosecurity bioterrorism biodefense Strateg Pract Sci* 2013;**11**:96–106.
- 79 Sadah SA, Shahbazi M, Wiley MT, *et al.* Demographic-based content analysis of web-based health-related social media. *J Med Internet Res* 2016;**18**:e148.
- 80 Sadah SA, Shahbazi M, Wiley MT, *et al.* A study of the demographics of web-based health-related social media users. *J Med Internet Res* 2015;**17**:e194.
- 81 World Health Organization. Myth busters. <https://www.who.int/emergencies/diseases/novel-coronavirus-2019/advice-for-public/myth-busters> (accessed 30 Apr 2020).
- 82 Smith D. Coronavirus: medical experts denounce Trump’s theory of ‘disinfectant injection’ | World news | The Guardian. 2020.<https://www.theguardian.com/world/2020/apr/23/trump-coronavirus-treatment-disinfectant> (accessed 30 Apr 2020).
- 83 Zhao Y, Zhang J. Consumer health information seeking in social media: a literature review. *Health Info Libr J* 2017;**34**:268–83. doi:10.1111/hir.12192

1  
2  
3  
4  
5  
6  
7  
8  
9  
10  
11  
12  
13  
14  
15  
16  
17  
18  
19  
20  
21  
22  
23  
24  
25  
26  
27  
28  
29  
30  
31  
32  
33  
34  
35  
36  
37  
38  
39  
40  
41  
42  
43  
44  
45  
46  
47  
48  
49  
50  
51  
52  
53  
54  
55  
56  
57  
58  
59  
60

For peer review only

**Table 1.** Website demographic and background information

| Type                         | Total (n,%)  | Treatment (n,%) | Prevention (n,%) | Treatment and Prevention (n,%) |
|------------------------------|--------------|-----------------|------------------|--------------------------------|
| Academic Centre              | 10 (3.12%)   | 1 (0.31%)       | 4 (1.25%)        | 5 (1.56%)                      |
| Charity/NGO                  | 12 (3.74%)   | 1 (0.31%)       | 9 (2.8%)         | 2 (0.62%)                      |
| Encyclopaedia                | 5 (1.56%)    | 0 (0%)          | 1 (0.31%)        | 4 (1.25%)                      |
| Government/Health Department | 87 (27.10%)  | 1 (0.31%)       | 65 (20.25%)      | 21 (6.54%)                     |
| Hospital                     | 7 (2.18%)    | 0 (0%)          | 5 (1.56%)        | 2 (0.62%)                      |
| Industry                     | 30 (9.35%)   | 8 (2.49%)       | 10 (3.12%)       | 12 (3.74%)                     |
| Military                     | 1 (0.31%)    | 0 (0%)          | 1 (0.31%)        | 0 (0%)                         |
| News Service                 | 163 (50.78%) | 34 (10.59%)     | 102 (31.78%)     | 27 (8.41%)                     |
| Patient group                | 1 (0.10%)    | 1 (0.31%)       | 0 (0%)           | 0 (0%)                         |
| Professional society         | 4 (1.25%)    | 0 (0%)          | 4 (1.25%)        | 0 (0%)                         |
| Research Centre              | 1 (0.31%)    | 0 (0%)          | 1 (0.31%)        | 0 (0%)                         |
| Total                        | 321          | 46 (14.33%)     | 202 (62.93%)     | 73 (22.74%)                    |

**Table 2.** Overall quality of information of all sources of information

| Indicator/<br>(Mean,<br>SD) | Academic<br>centre | Charity/N<br>GO | Encyclop<br>aedia | Governm<br>ent/Healt<br>h Departme<br>nt | Hospital | Industry | Military | News<br>Service | Patient<br>group | Professio<br>nal<br>society | Research<br>Centre | P Value |
|-----------------------------|--------------------|-----------------|-------------------|------------------------------------------|----------|----------|----------|-----------------|------------------|-----------------------------|--------------------|---------|
|-----------------------------|--------------------|-----------------|-------------------|------------------------------------------|----------|----------|----------|-----------------|------------------|-----------------------------|--------------------|---------|

1  
2  
3  
4  
5  
6  
7  
8  
9  
10  
11  
12  
13  
14  
15  
16  
17  
18  
19  
20  
21  
22  
23  
24  
25  
26  
27  
28  
29  
30  
31  
32  
33  
34  
35  
36  
37  
38  
39  
40  
41  
42  
43  
44  
45  
46

|                     |                  |                 |                 |                 |                 |                  |           |                  |           |                |           |        |
|---------------------|------------------|-----------------|-----------------|-----------------|-----------------|------------------|-----------|------------------|-----------|----------------|-----------|--------|
| EQIP Content        | 7.70<br>(2.50)   | 6.75<br>(3.33)  | 10.80<br>(3.11) | 8.11<br>(2.49)  | 7.14<br>(2.19)  | 7.13<br>(2.60)   | 5.00 (0)  | 6.22<br>(2.11)   | 10.00 (0) | 5.50 (3)       | 5.00 (0)  | <0.001 |
| EQIP Identification | 2.90<br>(1.20)   | 3.08<br>(0.90)  | 4.80<br>(0.45)  | 3.44<br>(1.03)  | 2.71<br>(1.38)  | 3.4 (1.13)       | 1.00 (0)  | 3.62<br>(0.73)   | 3.00 (0)  | 4.00 (0)       | 4.00 (0)  | 0.003  |
| EQIP Structure      | 7.90<br>(1.85)   | 7.67<br>(1.30)  | 8.60<br>(1.67)  | 7.34<br>(1.45)  | 7.43<br>(0.98)  | 6.97<br>(1.83)   | 9.00 (0)  | 7.22<br>(1.39)   | 10.00 (0) | 7.25 (0.5)     | 5.00 (0)  | 0.08   |
| EQIP Total          | 18.50<br>(3.66)  | 17.50<br>(4.32) | 24.20<br>(3.56) | 18.9<br>(3.79)  | 17.29<br>(3.50) | 17.5<br>(4.48)   | 15.00 (0) | 17.06<br>(3.19)  | 23.00 (0) | 16.75<br>(3.4) | 14.00 (0) | <0.001 |
| JAMA Total          | 2.50<br>(0.97)   | 2.50<br>(1.00)  | 3.40<br>(0.55)  | 2.16<br>(0.86)  | 2.14<br>(1.57)  | 2.73<br>(1.23)   | 1.00 (0)  | 2.98<br>(0.85)   | 3.00 (0)  | 3.50<br>(0.58) | 3.00 (0)  | <0.001 |
| DISCERN Reliability | 27.20<br>(6.78)  | 26.25<br>(6.51) | 35.60<br>(4.77) | 27.47<br>(5.96) | 29.86<br>(5.58) | 26.6<br>(7.46)   | 23.00 (0) | 26.31<br>(6.3)   | 27.00 (0) | 29.50<br>(4.2) | 26.00 (0) | 0.128  |
| DISCERN Treatment   | 13.00<br>(6.70)  | 9.42<br>(2.39)  | 16.00<br>(9.30) | 9.02<br>(3.14)  | 8.71<br>(1.89)  | 13.33<br>(6.39)  | 8.00 (0)  | 11.72<br>(6.22)  | 13.00 (0) | 8.50 (1)       | 17.00 (0) | 0.001  |
| DISCERN Total       | 40.20<br>(10.38) | 35.67<br>(7.67) | 51.60<br>(12.3) | 36.49<br>(7.50) | 38.57<br>(5.47) | 39.93<br>(10.45) | 31.00 (0) | 38.04<br>(10.44) | 40.00 (0) | 38.00<br>(5.1) | 43.00 (0) | 0.167  |

**Table 3.** Overall quality of information of all websites subsets

| Indicator/(Mean, SD) | Overall | Treatment | Prevention | Treatment and Prevention | P Value |
|----------------------|---------|-----------|------------|--------------------------|---------|
|----------------------|---------|-----------|------------|--------------------------|---------|

|                     |              |               |              |               |        |
|---------------------|--------------|---------------|--------------|---------------|--------|
| EQIP Content        | 6.97 (2.52)  | 6.26 (1.81)   | 6.55 (2.30)  | 8.58 (2.84)   | <0.001 |
| EQIP Identification | 3.50 (0.93)  | 3.87 (0.72)   | 3.32 (0.97)  | 3.78 (0.80)   | <0.001 |
| EQIP Structure      | 7.30 (1.47)  | 6.76 (1.46)   | 7.25 (1.46)  | 7.79 (1.37)   | <0.001 |
| EQIP Total          | 17.78 (3.71) | 16.89 (2.84)  | 17.12 (3.45) | 20.15 (3.95)  | <0.001 |
| JAMA Total          | 2.69 (0.98)  | 3.13 (0.72)   | 2.53 (1.05)  | 2.85 (0.84)   | 0.001  |
| DISCERN Reliability | 26.93 (6.35) | 26.98 (6.92)  | 26.04 (5.72) | 29.37 (7.04)  | <0.001 |
| DISCERN Treatment   | 11.07 (5.60) | 18.09 (6.04)  | 8.60 (2.45)  | 13.47 (6.73)  | <0.001 |
| DISCERN Total       | 38.00 (9.61) | 45.07 (11.67) | 34.64 (6.52) | 42.84 (10.93) | <0.001 |

**Table 4.** Comparison between Government and News Services

| Indicator | Global (USA inclusive) (n=250) | USA (n=121) |
|-----------|--------------------------------|-------------|
|-----------|--------------------------------|-------------|

1  
2  
3  
4  
5  
6  
7  
8  
9  
10  
11  
12  
13  
14  
15  
16  
17  
18  
19  
20  
21  
22  
23  
24  
25  
26  
27  
28  
29  
30  
31  
32  
33  
34  
35  
36  
37  
38  
39  
40  
41  
42  
43  
44  
45  
46

|                     | Government Mean Score | Government Mean Rank | News Mean Score | News Mean Rank | P Value | Government Mean Score | Government Mean Rank | News Mean Score | News Mean Rank | P Value |
|---------------------|-----------------------|----------------------|-----------------|----------------|---------|-----------------------|----------------------|-----------------|----------------|---------|
| EQIP Content        | 8.11                  | 161.34               | 6.22            | 106.37         | <0.001  | 7.66                  | 75.80                | 6.17            | 54.22          | 0.002   |
| EQIP Identification | 3.44                  | 118.28               | 3.62            | 129.35         | 0.207   | 3.34                  | 50.29                | 3.78            | 65.90          | 0.011   |
| EQIP Structure      | 7.34                  | 129.90               | 7.22            | 123.15         | 0.464   | 7.55                  | 67.54                | 7.08            | 58.01          | 0.148   |
| EQIP Total          | 18.90                 | 151.52               | 17.06           | 111.61         | <0.001  | 18.55                 | 71.21                | 17.04           | 56.33          | 0.029   |
| JAMA Total          | 2.16                  | 85.72                | 2.98            | 146.73         | <0.001  | 2.03                  | 34.28                | 3.17            | 73.23          | <0.001  |
| DISCERN Reliability | 27.47                 | 137.15               | 26.31           | 119.28         | 0.062   | 26.53                 | 60.26                | 26.66           | 61.34          | 0.876   |
| DISCERN Treatment   | 9.02                  | 110.95               | 11.72           | 133.27         | 0.001   | 8.84                  | 47.99                | 12.59           | 66.96          | 0.001   |



|               |       |        |       |        |       |       |       |       |       |       |
|---------------|-------|--------|-------|--------|-------|-------|-------|-------|-------|-------|
| DISCERN Total | 36.49 | 105.32 | 38.04 | 136.27 | 0.963 | 35.37 | 54.72 | 39.25 | 63.87 | 0.182 |
|---------------|-------|--------|-------|--------|-------|-------|-------|-------|-------|-------|

**Table 5.** Top 5 websites based on EQIP and DISCERN scores

| URL                                                                                                                                                                                                                               | Country                  | Treatment<br>Prevention | or | Total EQIP | Total JAMA | Total DISCERN |
|-----------------------------------------------------------------------------------------------------------------------------------------------------------------------------------------------------------------------------------|--------------------------|-------------------------|----|------------|------------|---------------|
| Top Scoring EQIP Sites                                                                                                                                                                                                            |                          |                         |    |            |            |               |
| <a href="https://www.gov.je/health/coronavirus/Pages/index.aspx">https://www.gov.je/health/coronavirus/Pages/index.aspx</a>                                                                                                       | Channel Islands (Jersey) | Both                    |    | 29         | 3          | 49            |
| <a href="https://en.wikipedia.org/wiki/2019%E2%80%9320_coronavirus_pandemic">https://en.wikipedia.org/wiki/2019%E2%80%9320_coronavirus_pandemic</a>                                                                               | USA                      | Both                    |    | 28         | 3          | 61            |
| <a href="https://www.health.nsw.gov.au/Infectious/alerts/Pages/coronavirus-faqs.aspx">https://www.health.nsw.gov.au/Infectious/alerts/Pages/coronavirus-faqs.aspx</a>                                                             | Australia                | Both                    |    | 28         | 3          | 46            |
| <a href="https://www.ageuk.org.uk/information-advice/coronavirus/coronavirus/#">https://www.ageuk.org.uk/information-advice/coronavirus/coronavirus/#</a>                                                                         | UK                       | Both                    |    | 27         | 3          | 48            |
| <a href="https://www.wikihow.com/Prevent-Coronavirus">https://www.wikihow.com/Prevent-Coronavirus</a>                                                                                                                             | USA                      | Prevention only         |    | 27         | 4          | 46            |
| Top Scoring DISCERN Sites                                                                                                                                                                                                         |                          |                         |    |            |            |               |
| <a href="https://www.sciencenews.org/article/coronavirus-covid19-repurposed-treatments-drugs">https://www.sciencenews.org/article/coronavirus-covid19-repurposed-treatments-drugs</a>                                             | USA                      | Treatment only          |    | 22         | 4          | 75            |
| <a href="https://www.vox.com/science-and-health/2020/3/4/21154590/coronavirus-vaccine-treatment-covid-19-drug-cure">https://www.vox.com/science-and-health/2020/3/4/21154590/coronavirus-vaccine-treatment-covid-19-drug-cure</a> | USA                      | Both                    |    | 22         | 4          | 74            |

1  
2  
3  
4  
5  
6  
7  
8  
9  
10  
11  
12  
13  
14  
15  
16  
17  
18  
19  
20  
21  
22  
23  
24  
25  
26  
27  
28  
29  
30  
31  
32  
33  
34  
35  
36  
37  
38  
39  
40  
41  
42  
43  
44  
45  
46

|                                                                                                                                                                                                                                                       |     |                |    |   |    |
|-------------------------------------------------------------------------------------------------------------------------------------------------------------------------------------------------------------------------------------------------------|-----|----------------|----|---|----|
| <a href="https://en.wikipedia.org/wiki/Coronavirus_disease_2019">https://en.wikipedia.org/wiki/Coronavirus_disease_2019</a>                                                                                                                           | USA | Both           | 25 | 3 | 68 |
| <a href="https://www.bloomberg.com/news/articles/2020-03-25/hydroxychloroquine-no-better-than-regular-covid-19-care-in-study">https://www.bloomberg.com/news/articles/2020-03-25/hydroxychloroquine-no-better-than-regular-covid-19-care-in-study</a> | USA | Treatment only | 21 | 3 | 65 |
| <a href="https://www.theverge.com/2020/2/4/21122327/coronavirus-experimental-medication-treatment-wuhan-china-gilead-hiv">https://www.theverge.com/2020/2/4/21122327/coronavirus-experimental-medication-treatment-wuhan-china-gilead-hiv</a>         | USA | Treatment only | 18 | 4 | 64 |

For peer review only

1  
2  
3  
4  
5  
6  
7  
8  
9  
10  
11  
12  
13  
14  
15  
16  
17  
18  
19  
20  
21  
22  
23  
24  
25  
26  
27  
28  
29  
30  
31  
32  
33  
34  
35  
36  
37  
38  
39  
40  
41  
42  
43  
44  
45  
46  
47  
48  
49  
50  
51  
52  
53  
54  
55  
56  
57  
58  
59  
60



Figure 1. Popular Search Terms

99x123mm (300 x 300 DPI)

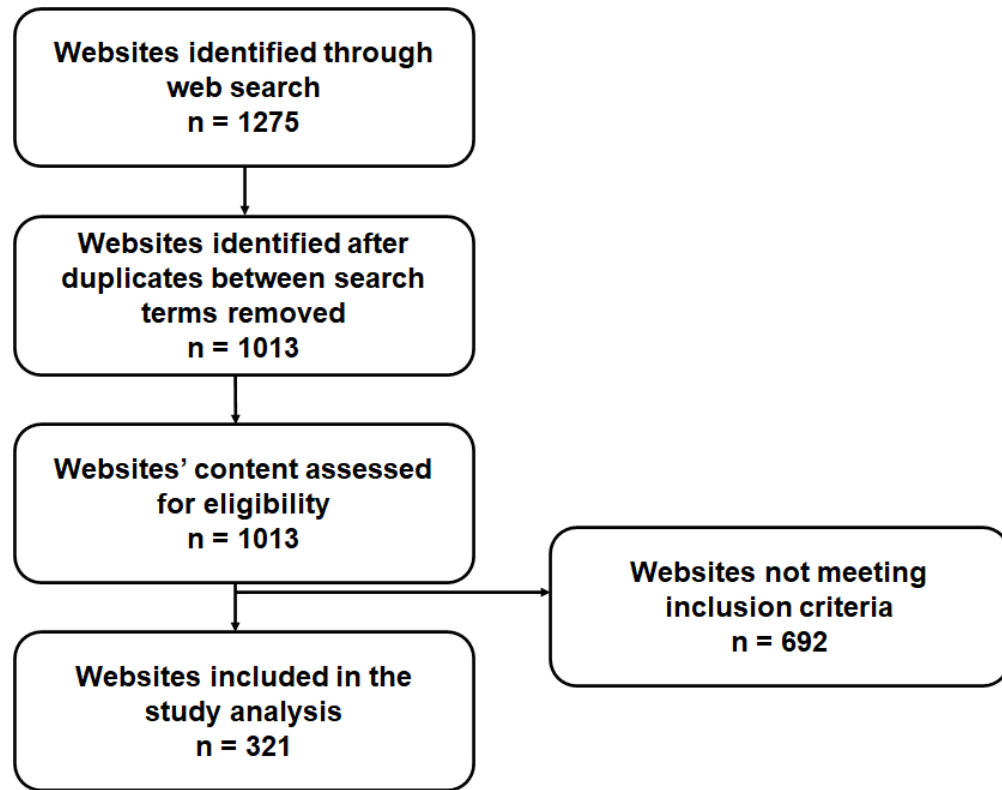

Figure 2. Workflow of Webscraping and Exclusion

70x55mm (300 x 300 DPI)

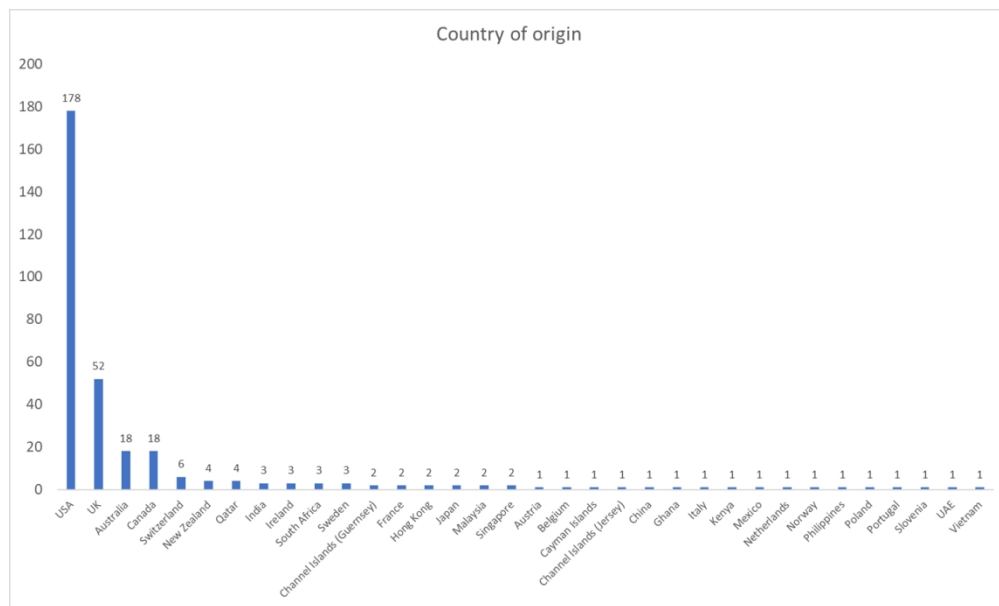

Figure 3. Country of origin of websites

132x79mm (300 x 300 DPI)

1  
2  
3  
4  
5  
6  
7  
8  
9  
10  
11  
12  
13  
14  
15  
16  
17  
18  
19  
20  
21  
22  
23  
24  
25  
26  
27  
28  
29  
30  
31  
32  
33  
34  
35  
36  
37  
38  
39  
40  
41  
42  
43  
44  
45  
46  
47  
48  
49  
50  
51  
52  
53  
54  
55  
56  
57  
58  
59  
60

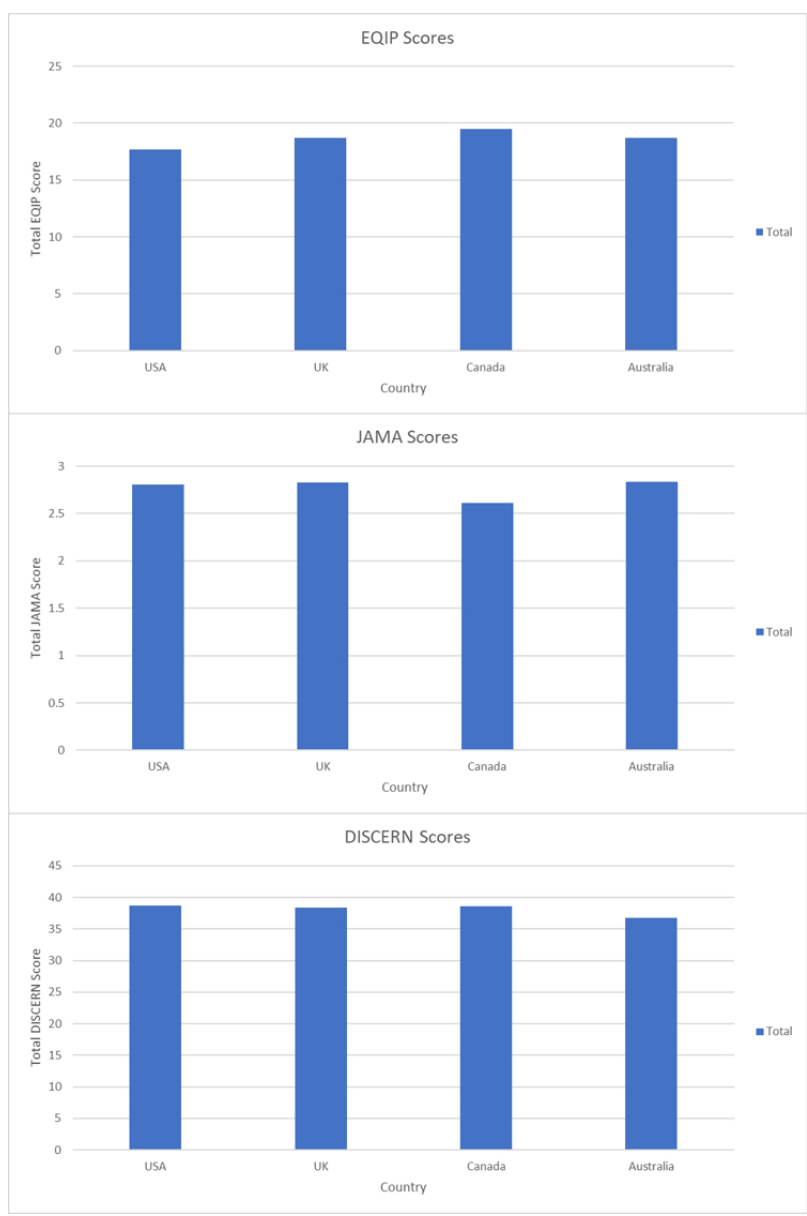

Figure 4. Scores by top contributing countries  
63x94mm (300 x 300 DPI)

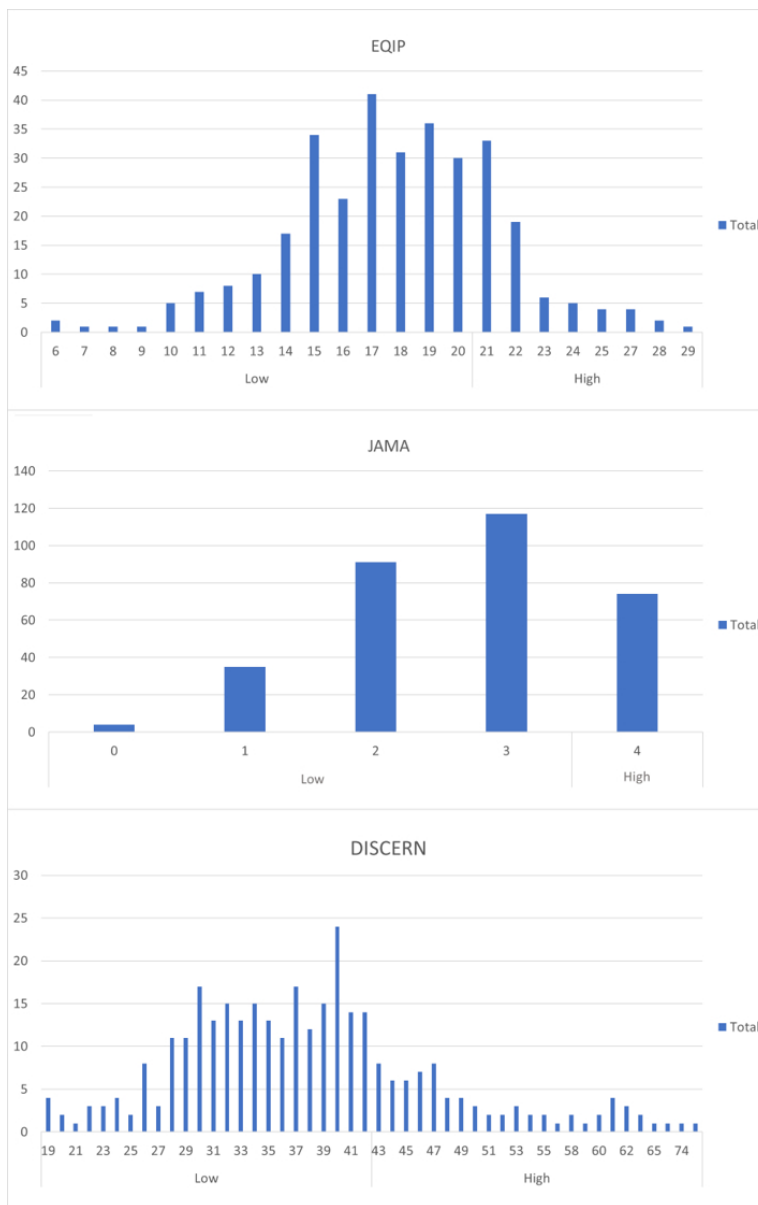

Figure 5. High-score distribution

60x94mm (300 x 300 DPI)

| Item                                            |     | Overall number of websites (n, %) | High-scoring websites (n, %) | Low-scoring websites (n, %) | OR     |
|-------------------------------------------------|-----|-----------------------------------|------------------------------|-----------------------------|--------|
| <b>Modified EQIP Content Data</b>               |     |                                   |                              |                             |        |
| 1. Initial definition of which subjects will be | Yes | 274 (85.36%)                      | 71 (95.95%)                  | 203 (82.19%)                | 5.102  |
|                                                 | No  | 47 (14.64%)                       | 3 (4.05%)                    | 44 (17.81%)                 |        |
| 2. Coverage of the previously defined           | Yes | 273 (85.05%)                      | 71 (95.95%)                  | 202 (81.78%)                | 3.509  |
|                                                 | No  | 48 (14.95%)                       | 3 (4.05%)                    | 45 (18.22%)                 |        |
| 3. Description of the medical                   | Yes | 251 (78.19%)                      | 73 (98.65%)                  | 178 (72.06%)                | 5.882  |
|                                                 | No  | 70 (21.81%)                       | 1 (1.35%)                    | 69 (27.94%)                 |        |
| 4. Definition of the purpose of the             | Yes | 216 (67.29%)                      | 67 (90.54%)                  | 149 (60.32%)                | 27.778 |
|                                                 | No  | 105 (32.71%)                      | 7 (9.46%)                    | 98 (39.68%)                 |        |
| 5. Description of treatment alternatives        | Yes | 82 (25.55%)                       | 40 (54.05%)                  | 42 (17%)                    | 6.250  |
|                                                 | No  | 239 (74.45%)                      | 34 (45.95%)                  | 205 (83%)                   |        |
| 6. Description of the sequence of the           | Yes | 51 (15.89%)                       | 26 (35.14%)                  | 25 (10.12%)                 | 4.785  |
|                                                 | No  | 270 (84.11%)                      | 48 (64.86%)                  | 222 (89.88%)                |        |
| 7. Description of the qualitative benefits for  | Yes | 114 (35.51%)                      | 46 (62.16%)                  | 68 (27.53%)                 | 4.310  |
|                                                 | No  | 207 (64.49%)                      | 28 (37.84%)                  | 179 (72.47%)                |        |
| 8. Description of the quantitative benefits to  | Yes | 9 (2.8%)                          | 3 (4.05%)                    | 6 (2.43%)                   | 1.695  |
|                                                 | No  | 312 (97.2%)                       | 71 (95.95%)                  | 241 (97.57%)                |        |
| 9. Description of the qualitative risks and     | Yes | 49 (15.26%)                       | 25 (33.78%)                  | 24 (9.72%)                  | 4.717  |
|                                                 | No  | 272 (84.74%)                      | 49 (66.22%)                  | 223 (90.28%)                |        |
| 10. Description of the quantitative risks and   | Yes | 3 (0.93%)                         | 3 (4.05%)                    | 0 (0%)                      | -      |
|                                                 | No  | 318 (99.07%)                      | 71 (95.95%)                  | 247 (100%)                  |        |
| 11. Addressing quality-of-life issues           | Yes | 137 (42.68%)                      | 58 (78.38%)                  | 79 (31.98%)                 | 7.634  |
|                                                 | No  | 184 (57.32%)                      | 16 (21.62%)                  | 168 (68.02%)                |        |
| 12. Description of how complications are        | Yes | 35 (10.9%)                        | 20 (27.03%)                  | 15 (6.07%)                  | 5.682  |
|                                                 | No  | 286 (89.1%)                       | 54 (72.97%)                  | 232 (93.93%)                |        |
| 13. Description of the precautions that the     | Yes | 265 (82.55%)                      | 70 (94.59%)                  | 195 (78.95%)                | 4.651  |
|                                                 | No  | 56 (17.45%)                       | 4 (5.41%)                    | 52 (21.05%)                 |        |
| 14. Mention of alert signs that the patient     | Yes | 212 (66.04%)                      | 66 (89.19%)                  | 146 (59.11%)                | 5.682  |
|                                                 | No  | 109 (33.96%)                      | 8 (10.81%)                   | 101 (40.89%)                |        |
| 15. Addressing medical intervention costs and   | Yes | 68 (21.18%)                       | 31 (41.89%)                  | 37 (14.98%)                 | 3.968  |
|                                                 | No  | 253 (78.82%)                      | 43 (58.11%)                  | 210 (85.02%)                |        |
| 16. Specific contact details for hospital       | Yes | 10 (3.12%)                        | 3 (4.05%)                    | 7 (2.83%)                   | -      |
|                                                 | No  | 311 (96.88%)                      | 71 (95.95%)                  | 240 (97.17%)                |        |



|                                                   |     |              |             |              |       |
|---------------------------------------------------|-----|--------------|-------------|--------------|-------|
| 17. Specific details of other sources of reliable | Yes | 185 (57.63%) | 62 (83.78%) | 123 (49.8%)  | 5.181 |
|                                                   | No  | 136 (42.37%) | 12 (16.22%) | 124 (50.2%)  |       |
| 18. Coverage of all relevant issues for the       | Yes | 4 (1.25%)    | 4 (5.41%)   | 0 (0%)       | -     |
|                                                   | No  | 317 (98.75%) | 70 (94.59%) | 247 (100%)   |       |
| <b>Modified EQIP Identification Data</b>          |     |              |             |              |       |
| 19. Date of issue or revision                     | Yes | 280 (87.23%) | 69 (93.24%) | 211 (85.43%) | 2.347 |
|                                                   | No  | 41 (12.77%)  | 5 (6.76%)   | 36 (14.57%)  |       |
| 20. Logo of the issuing body                      | Yes | 317 (98.75%) | 74 (100%)   | 243 (98.38%) | -     |
|                                                   | No  | 4 (1.25%)    | 0 (0%)      | 4 (1.62%)    |       |
| 21. Names of the persons or entities that         | Yes | 254 (79.13%) | 61 (82.43%) | 193 (78.14%) | 1.312 |
|                                                   | No  | 67 (20.87%)  | 13 (17.57%) | 54 (21.86%)  |       |
| 22. Names of the persons or entities that         | Yes | 210 (65.42%) | 62 (83.78%) | 148 (59.92%) | 3.448 |
|                                                   | No  | 111 (34.58%) | 12 (16.22%) | 99 (40.08%)  |       |
| 23. Short bibliography of the evidence-based data | Yes | 60 (18.69%)  | 31 (41.89%) | 29 (11.74%)  | 5.376 |
|                                                   | No  | 261 (81.31%) | 43 (58.11%) | 218 (88.26%) |       |
| 24. Statement about whether and how               | Yes | 3 (0.93%)    | 1 (1.35%)   | 2 (0.81%)    | 1.675 |
|                                                   | No  | 318 (99.07%) | 73 (98.65%) | 245 (99.19%) |       |
| <b>Modified EQIP Structure Data</b>               |     |              |             |              |       |
| 25. Use of everyday language and                  | Yes | 3 (0.93%)    | 72 (97.3%)  | 229 (92.71%) | 2.825 |
|                                                   | No  | 318 (99.07%) | 2 (5.41%)   | 18 (25.35%)  |       |
| 26. Use of generic names for all medications or   | Yes | 88 (27.41%)  | 35 (47.3%)  | 53 (21.46%)  | 1.838 |
|                                                   | No  | 233 (44.05%) | 39 (35.14%) | 194 (46.41%) |       |
| 27. Use of short sentences (<15 words on          | Yes | 296 (92.21%) | 72 (97.3%)  | 224 (90.69%) | 3.690 |
|                                                   | No  | 25 (9.47%)   | 2 (2.99%)   | 23 (11.68%)  |       |
| 28. Personal address to the reader                | Yes | 239 (74.45%) | 65 (87.84%) | 174 (70.45%) | 3.021 |
|                                                   | No  | 82 (21.03%)  | 9 (10.98%)  | 73 (23.7%)   |       |
| 29. Respectful tone                               | Yes | 308 (95.95%) | 73 (98.65%) | 235 (95.14%) | 3.717 |
|                                                   | No  | 13 (4.22%)   | 1 (1.35%)   | 12 (5.13%)   |       |
| 30. Clear information (no ambiguities or          | Yes | 295 (91.9%)  | 73 (98.65%) | 222 (89.88%) | 8.197 |
|                                                   | No  | 26 (31.71%)  | 1 (3.33%)   | 25 (48.08%)  |       |
| 31. Balanced information on risks and benefits    | Yes | 56 (17.45%)  | 29 (39.19%) | 27 (10.93%)  | 5.208 |
|                                                   | No  | 265 (47.58%) | 45 (37.82%) | 220 (50.23%) |       |
| 32. Presentation of information in a logical      | Yes | 292 (90.97%) | 74 (100%)   | 218 (88.26%) | -     |
|                                                   | No  | 29 (9.12%)   | 0 (0%)      | 29 (11.84%)  |       |

|                                                     |     |              |             |              |        |
|-----------------------------------------------------|-----|--------------|-------------|--------------|--------|
| 33. Satisfactory design and layout (excluding       | Yes | 289 (90.03%) | 73 (98.65%) | 216 (87.45%) | 10.417 |
|                                                     | No  | 32 (22.38%)  | 1 (2.33%)   | 31 (31%)     |        |
| 34. Clear and relevant figures or graphs (NA if     | Yes | 111 (34.58%) | 42 (56.76%) | 69 (27.94%)  | 12.987 |
|                                                     | No  | 210 (75.27%) | 32 (65.31%) | 178 (77.39%) |        |
| 35. Inclusion of a named space for the reader's     | Yes | 69 (21.5%)   | 17 (22.97%) | 52 (21.05%)  | 1.119  |
|                                                     | No  | 252 (100%)   | 57 (100%)   | 195 (100%)   |        |
| 36. Inclusion of a printed consent form contrary to | Yes | 0 (0%)       | 0 (0%)      | 0 (0%)       | -      |
|                                                     | No  | 321 (100%)   | 74 (100%)   | 247 (100%)   |        |

\*Some data is omitted due to odds ratio and confidence interval being infinite values

For peer review only

| 95% CI           | P Value |
|------------------|---------|
|                  |         |
| 1.560 - 26.316   | 0.002   |
| 0.483 - 166.667  | 0.300   |
| 3.215 - 10.870   | <0.001  |
| 4.695 - 1000.000 | <0.001  |
| 2.725 - 16.949   | <0.001  |
| 2.427 - 9.434    | <0.001  |
| 2.416 - 7.752    | <0.001  |
| 0.267 - 8.197    | 0.436   |
| 2.370 - 9.434    | <0.001  |
| -                | 0.012   |
| 4.032 - 15.152   | <0.001  |
| 2.584 - 12.821   | <0.001  |
| 1.621 - 18.519   | 0.001   |
| 2.571 - 14.286   | <0.001  |
| 2.137 - 7.407    | <0.001  |
| -                | 0.228   |

1  
2  
3  
4  
5  
6  
7  
8  
9  
10  
11  
12  
13  
14  
15  
16  
17  
18  
19  
20  
21  
22  
23  
24  
25  
26  
27  
28  
29  
30  
31  
32  
33  
34  
35  
36  
37  
38  
39  
40  
41  
42  
43  
44  
45  
46

|                 |        |
|-----------------|--------|
| 2.604 - 11.111  | <0.001 |
| -               | 0.003  |
|                 |        |
| 0.870 - 8.000   | 0.110  |
| -               | 0.577  |
| 0.652 - 2.801   | 0.515  |
| 1.727 - 7.407   | <0.001 |
| 1.727 - 7.407   | <0.001 |
| 1.727 - 7.407   | 0.546  |
|                 |        |
| 0.650 - 25.64   | 0.181  |
| 0.561 - 7.143   | 0.309  |
| 0.875 - 33.333  | 0.082  |
| 1.401 - 7.299   | 0.002  |
| 0.533 - 166.667 | 0.312  |
| 1.294 - 333.333 | 0.013  |
| 2.703 - 10.101  | <0.001 |
| -               | 0.001  |

For peer review only

|                 |        |
|-----------------|--------|
| 1.675 - 500.000 | 0.003  |
| 3.086 - 111.111 | <0.001 |
| 0.561 - 2.151   | 0.748  |
| -               | -      |

For peer review only

| Item                                                                      |     | Overall number of websites (n, %) | High-scoring websites (n, %) | Low-scoring websites (n,%) |
|---------------------------------------------------------------------------|-----|-----------------------------------|------------------------------|----------------------------|
| <b>JAMA Benchmark</b>                                                     |     |                                   |                              |                            |
| 1. Authorship: Authors and contributors, their affiliations,              | Yes | 183 (57.01%)                      | 74 (100%)                    | 109 (44.13%)               |
|                                                                           | No  | 138 (42.99%)                      | 0 (0%)                       | 138 (55.87%)               |
| 2. Attribution: References and sources for all content should             | Yes | 118 (36.76%)                      | 74 (100%)                    | 44 (17.81%)                |
|                                                                           | No  | 203 (63.24%)                      | 0 (0%)                       | 203 (82.19%)               |
| 3. Disclosure: Web site "ownership", sponsorship, funding arrangements or | Yes | 287 (89.41%)                      | 74 (100%)                    | 213 (86.23%)               |
|                                                                           | No  | 34 (10.59%)                       | 0 (0%)                       | 34 (13.77%)                |
| 4. Currency: Dates that content was posted and updated                    | Yes | 276 (85.98%)                      | 74 (100%)                    | 202 (81.78%)               |
|                                                                           | No  | 45 (14.02%)                       | 0 (0%)                       | 45 (18.22%)                |

\*Some data is omitted due to odds ratio and confidence interval being inf

For peer review only

1  
2  
3  
4  
5  
6  
7  
8  
9  
10  
11  
12  
13  
14  
15  
16  
17  
18  
19  
20  
21  
22  
23  
24  
25  
26  
27  
28  
29  
30  
31  
32  
33  
34  
35  
36  
37  
38  
39  
40  
41  
42  
43  
44  
45  
46

| OR            | 95% CI | P Value |
|---------------|--------|---------|
| -             | -      | <0.001  |
| -             | -      | <0.001  |
| -             | -      | <0.001  |
| -             | -      | <0.001  |
| finite values |        |         |

| Item                                                                                                                 | Score | Overall number of websites (n, %) | High-scoring websites (n,%) | Low-scoring websites (n,%) |
|----------------------------------------------------------------------------------------------------------------------|-------|-----------------------------------|-----------------------------|----------------------------|
| <b>DISCERN Reliability</b>                                                                                           |       |                                   |                             |                            |
| 1. Are the aims clear?                                                                                               | 1     | 6 (1.87%)                         | 0 (0%)                      | 6 (2.45%)                  |
|                                                                                                                      | 2     | 16 (4.98%)                        | 2 (2.63%)                   | 14 (5.71%)                 |
|                                                                                                                      | 3     | 39 (12.15%)                       | 9 (11.84%)                  | 30 (12.24%)                |
|                                                                                                                      | 4     | 51 (15.89%)                       | 6 (7.89%)                   | 45 (18.37%)                |
|                                                                                                                      | 5     | 209 (65.11%)                      | 59 (77.63%)                 | 150 (61.22%)               |
| 2. Does it achieve its aims                                                                                          | 1     | 7 (2.18%)                         | 0 (0%)                      | 7 (2.86%)                  |
|                                                                                                                      | 2     | 18 (5.61%)                        | 4 (5.26%)                   | 14 (5.71%)                 |
|                                                                                                                      | 3     | 45 (14.02%)                       | 10 (13.16%)                 | 35 (14.29%)                |
|                                                                                                                      | 4     | 57 (17.76%)                       | 8 (10.53%)                  | 49 (20%)                   |
|                                                                                                                      | 5     | 194 (60.44%)                      | 54 (71.05%)                 | 140 (57.14%)               |
| 3. Is it relevant?                                                                                                   | 1     | 4 (1.25%)                         | 0 (0%)                      | 4 (1.63%)                  |
|                                                                                                                      | 2     | 17 (5.3%)                         | 3 (3.95%)                   | 14 (5.71%)                 |
|                                                                                                                      | 3     | 42 (13.08%)                       | 14 (18.42%)                 | 28 (11.43%)                |
|                                                                                                                      | 4     | 64 (19.94%)                       | 3 (3.95%)                   | 61 (24.9%)                 |
|                                                                                                                      | 5     | 194 (60.44%)                      | 56 (73.68%)                 | 138 (56.33%)               |
| 4. Is it clear what sources of information were used to compile the publication (other than the author or producer)? | 1     | 68 (21.18%)                       | 3 (3.95%)                   | 65 (26.53%)                |
|                                                                                                                      | 2     | 67 (20.87%)                       | 3 (3.95%)                   | 64 (26.12%)                |
|                                                                                                                      | 3     | 72 (22.43%)                       | 14 (18.42%)                 | 58 (23.67%)                |
|                                                                                                                      | 4     | 48 (14.95%)                       | 15 (19.74%)                 | 33 (13.47%)                |
|                                                                                                                      | 5     | 66 (20.56%)                       | 41 (53.95%)                 | 25 (10.2%)                 |
| 5. Is it clear when the information used or reported in the publication was produced?                                | 1     | 83 (25.86%)                       | 2 (2.63%)                   | 81 (33.06%)                |
|                                                                                                                      | 2     | 78 (24.3%)                        | 12 (15.79%)                 | 66 (26.94%)                |
|                                                                                                                      | 3     | 88 (27.41%)                       | 28 (36.84%)                 | 60 (24.49%)                |
|                                                                                                                      | 4     | 36 (11.21%)                       | 11 (14.47%)                 | 25 (10.2%)                 |
|                                                                                                                      | 5     | 36 (11.21%)                       | 23 (30.26%)                 | 13 (5.31%)                 |
| 6. Is it balanced and unbiased?                                                                                      | 1     | 24 (7.48%)                        | 4 (5.26%)                   | 20 (8.16%)                 |
|                                                                                                                      | 2     | 65 (20.25%)                       | 16 (21.05%)                 | 49 (20%)                   |
|                                                                                                                      | 3     | 146 (45.48%)                      | 33 (43.42%)                 | 113 (46.12%)               |
|                                                                                                                      | 4     | 69 (21.5%)                        | 14 (18.42%)                 | 55 (22.45%)                |
|                                                                                                                      | 5     | 17 (5.3%)                         | 9 (11.84%)                  | 8 (3.27%)                  |
|                                                                                                                      | 1     | 77 (23.99%)                       | 4 (5.26%)                   | 73 (29.8%)                 |



|                                                                                |   |              |             |              |
|--------------------------------------------------------------------------------|---|--------------|-------------|--------------|
| 7. Does it provide details of additional sources of support and information?   | 2 | 64 (19.94%)  | 15 (19.74%) | 49 (20%)     |
|                                                                                | 3 | 62 (19.31%)  | 19 (25%)    | 43 (17.55%)  |
|                                                                                | 4 | 58 (18.07%)  | 17 (22.37%) | 41 (16.73%)  |
|                                                                                | 5 | 60 (18.69%)  | 21 (27.63%) | 39 (15.92%)  |
| 8. Does it refer to areas of uncertainty?                                      | 1 | 99 (30.84%)  | 14 (18.42%) | 85 (34.69%)  |
|                                                                                | 2 | 61 (19%)     | 15 (19.74%) | 46 (18.78%)  |
|                                                                                | 3 | 75 (23.36%)  | 24 (31.58%) | 51 (20.82%)  |
|                                                                                | 4 | 44 (13.71%)  | 10 (13.16%) | 34 (13.88%)  |
|                                                                                | 5 | 42 (13.08%)  | 13 (17.11%) | 29 (11.84%)  |
| <b>DISCERN Quality and Overall rating</b>                                      |   |              |             |              |
| 9. Does it describe how each treatment works?                                  | 1 | 250 (77.88%) | 52 (68.42%) | 198 (80.82%) |
|                                                                                | 2 | 24 (7.48%)   | 8 (10.53%)  | 16 (6.53%)   |
|                                                                                | 3 | 18 (5.61%)   | 4 (5.26%)   | 14 (5.71%)   |
|                                                                                | 4 | 13 (4.05%)   | 6 (7.89%)   | 7 (2.86%)    |
|                                                                                | 5 | 16 (4.98%)   | 6 (7.89%)   | 10 (4.08%)   |
| 10. Does it describe the benefits of each treatment?                           | 1 | 247 (76.95%) | 52 (68.42%) | 195 (79.59%) |
|                                                                                | 2 | 20 (6.23%)   | 6 (7.89%)   | 14 (5.71%)   |
|                                                                                | 3 | 26 (8.1%)    | 6 (7.89%)   | 20 (8.16%)   |
|                                                                                | 4 | 20 (6.23%)   | 7 (9.21%)   | 13 (5.31%)   |
|                                                                                | 5 | 8 (2.49%)    | 5 (6.58%)   | 3 (1.22%)    |
| 11. Does it describe the risks of each treatment?                              | 1 | 281 (87.54%) | 60 (78.95%) | 221 (90.2%)  |
|                                                                                | 2 | 18 (5.61%)   | 6 (7.89%)   | 12 (4.9%)    |
|                                                                                | 3 | 17 (5.3%)    | 7 (9.21%)   | 10 (4.08%)   |
|                                                                                | 4 | 3 (0.93%)    | 1 (1.32%)   | 2 (0.82%)    |
|                                                                                | 5 | 2 (0.62%)    | 2 (2.63%)   | 0 (0%)       |
| 12. Does it describe what would happen if no treatment is used?                | 1 | 283 (88.16%) | 61 (80.26%) | 222 (90.61%) |
|                                                                                | 2 | 15 (4.67%)   | 6 (7.89%)   | 9 (3.67%)    |
|                                                                                | 3 | 13 (4.05%)   | 5 (6.58%)   | 8 (3.27%)    |
|                                                                                | 4 | 7 (2.18%)    | 2 (2.63%)   | 5 (2.04%)    |
|                                                                                | 5 | 3 (0.93%)    | 2 (2.63%)   | 1 (0.41%)    |
| 13. Does it describe how the treatment choices affect overall quality of life? | 1 | 289 (90.03%) | 62 (81.58%) | 227 (92.65%) |
|                                                                                | 2 | 13 (4.05%)   | 5 (6.58%)   | 8 (3.27%)    |
|                                                                                | 3 | 14 (4.36%)   | 8 (10.53%)  | 6 (2.45%)    |
|                                                                                | 4 | 2 (0.62%)    | 0 (0%)      | 2 (0.82%)    |

|                                                                                                                                      |   |              |             |              |
|--------------------------------------------------------------------------------------------------------------------------------------|---|--------------|-------------|--------------|
|                                                                                                                                      | 5 | 3 (0.93%)    | 1 (1.32%)   | 2 (0.82%)    |
| 14. Is it clear that there may be more than one possible treatment choice?                                                           | 1 | 240 (74.77%) | 52 (68.42%) | 188 (76.73%) |
|                                                                                                                                      | 2 | 18 (5.61%)   | 5 (6.58%)   | 13 (5.31%)   |
|                                                                                                                                      | 3 | 24 (7.48%)   | 6 (7.89%)   | 18 (7.35%)   |
|                                                                                                                                      | 4 | 10 (3.12%)   | 2 (2.63%)   | 8 (3.27%)    |
|                                                                                                                                      | 5 | 29 (9.03%)   | 11 (14.47%) | 18 (7.35%)   |
| 15. Does it provide support for shared decision-making?                                                                              | 1 | 262 (81.62%) | 59 (77.63%) | 203 (82.86%) |
|                                                                                                                                      | 2 | 13 (4.05%)   | 7 (9.21%)   | 6 (2.45%)    |
|                                                                                                                                      | 3 | 35 (10.9%)   | 4 (5.26%)   | 31 (12.65%)  |
|                                                                                                                                      | 4 | 3 (0.93%)    | 2 (2.63%)   | 1 (0.41%)    |
|                                                                                                                                      | 5 | 8 (2.49%)    | 4 (5.26%)   | 4 (1.63%)    |
| 16. Based on the answers to all of the above questions, rate the overall quality of the publication as a source of information about | 1 | 241 (75.08%) | 52 (68.42%) | 189 (77.14%) |
|                                                                                                                                      | 2 | 48 (14.95%)  | 12 (15.79%) | 36 (14.69%)  |
|                                                                                                                                      | 3 | 25 (7.79%)   | 8 (10.53%)  | 17 (6.94%)   |
|                                                                                                                                      | 4 | 7 (2.18%)    | 4 (5.26%)   | 3 (1.22%)    |
|                                                                                                                                      | 5 | 0 (0%)       | 0 (0%)      | 0 (0%)       |

1  
2  
3  
4  
5  
6  
7  
8  
9  
10  
11  
12  
13  
14  
15  
16  
17  
18  
19  
20  
21  
22  
23  
24  
25  
26  
27  
28  
29  
30  
31  
32  
33  
34  
35  
36  
37  
38  
39  
40  
41  
42  
43  
44  
45  
46

| P Value |
|---------|
|         |
| 0.321   |
| 0.246   |
| 0.032   |
| 0.019   |
| 0.007   |
| <0.001  |
|         |

For peer review only

|    |        |
|----|--------|
| 1  |        |
| 2  |        |
| 3  | 0.093  |
| 4  |        |
| 5  |        |
| 6  |        |
| 7  |        |
| 8  | <0.001 |
| 9  |        |
| 10 |        |
| 11 |        |
| 12 |        |
| 13 |        |
| 14 |        |
| 15 | 0.005  |
| 16 |        |
| 17 |        |
| 18 |        |
| 19 |        |
| 20 |        |
| 21 | <0.001 |
| 22 |        |
| 23 |        |
| 24 |        |
| 25 |        |
| 26 |        |
| 27 | 0.016  |
| 28 |        |
| 29 |        |
| 30 |        |
| 31 |        |
| 32 |        |
| 33 | <0.001 |
| 34 |        |
| 35 |        |
| 36 |        |
| 37 |        |
| 38 |        |
| 39 | <0.001 |
| 40 |        |
| 41 |        |

For peer review only

1  
2  
3  
4  
5  
6  
7  
8  
9  
10  
11  
12  
13  
14  
15  
16  
17  
18  
19  
20  
21  
22  
23  
24  
25  
26  
27  
28  
29  
30  
31  
32  
33  
34  
35  
36  
37  
38  
39  
40  
41  
42  
43  
44  
45  
46

|        |
|--------|
|        |
| <0.001 |
| <0.001 |
| <0.001 |

For peer review only

| URL                                                                         | Country   | Original search term               | Texas, USA March | Texas, USA July | London, UK July | Toronto, C |
|-----------------------------------------------------------------------------|-----------|------------------------------------|------------------|-----------------|-----------------|------------|
| <b>Top Scoring EQIP Sites</b>                                               |           |                                    |                  |                 |                 |            |
| <a href="https://www.gov.ie/health">https://www.gov.ie/health</a>           | UK        | What is self isolation coronavirus | Page 4           | None            | None            | No         |
| <a href="https://en.wikipedia.org/">https://en.wikipedia.org/</a>           | USA       | Coronavirus                        | Page 1           | None            | None            | No         |
| <a href="https://www.health.nsw.gov.au/">https://www.health.nsw.gov.au/</a> | Australia | Covid 19                           | Page 10          | Page 4          | None            | No         |
| <a href="https://www.ageuk.org.uk/">https://www.ageuk.org.uk/</a>           | UK        | Stop getting coronavirus           | Page 6           | Page 4          | Page 2          | No         |
| <a href="https://www.wikihow.co">https://www.wikihow.co</a>                 | USA       | Stop getting coronavirus           | Page 10          | None            | None            | No         |
| <b>Top Scoring DISCERN Sites</b>                                            |           |                                    |                  |                 |                 |            |
| <a href="https://www.sciencenews.org/">https://www.sciencenews.org/</a>     | USA       | How to treat coronavirus           | Page 10          | None            | None            | No         |
| <a href="https://www.vox.com/science">https://www.vox.com/science</a>       | USA       | Drugs for coronavirus              | Page 3           | None            | None            | No         |
| <a href="https://en.wikipedia.org/">https://en.wikipedia.org/</a>           | USA       | Covid 19                           | Page 1           | Page 1          | Page 1          | No         |
| <a href="https://www.kineta.org/">https://www.kineta.org/</a>               | USA       | Drugs for coronavirus              | Page 1           | None            | None            | No         |
| <a href="https://www.bloomberg.com">https://www.bloomberg.com</a>           | USA       | Drugs for coronavirus              | Page 32          | None            | None            | No         |
| <a href="https://www.theverge.co">https://www.theverge.co</a>               |           |                                    |                  |                 |                 |            |

1  
2  
3  
4  
5  
6  
7  
8  
9  
10  
11  
12  
13  
14  
15  
16  
17  
18  
19  
20  
21  
22  
23  
24  
25  
26  
27  
28  
29  
30  
31  
32  
33  
34  
35  
36  
37  
38  
39  
40  
41  
42  
43  
44  
45  
46

| Canada July | Sydney, Australia July | URL Changes |
|-------------|------------------------|-------------|
| None        | None                   | Same        |
| None        | None                   | Changed     |
| None        | Page 1                 | Same        |
| None        | None                   | Same        |
| None        | Page 9                 | Same        |
| None        | None                   | Same        |
| None        | None                   | Same        |

For peer review only

1  
2  
3  
4  
5  
6  
7  
8  
9  
10  
11  
12  
13  
14  
15  
16  
17  
18  
19  
20  
21  
22  
23  
24  
25  
26  
27  
28  
29  
30  
31  
32  
33  
34  
35  
36  
37  
38  
39  
40  
41  
42  
43  
44  
45  
46  
47  
48  
49  
50  
51  
52  
53  
54  
55  
56  
57  
58  
59  
60

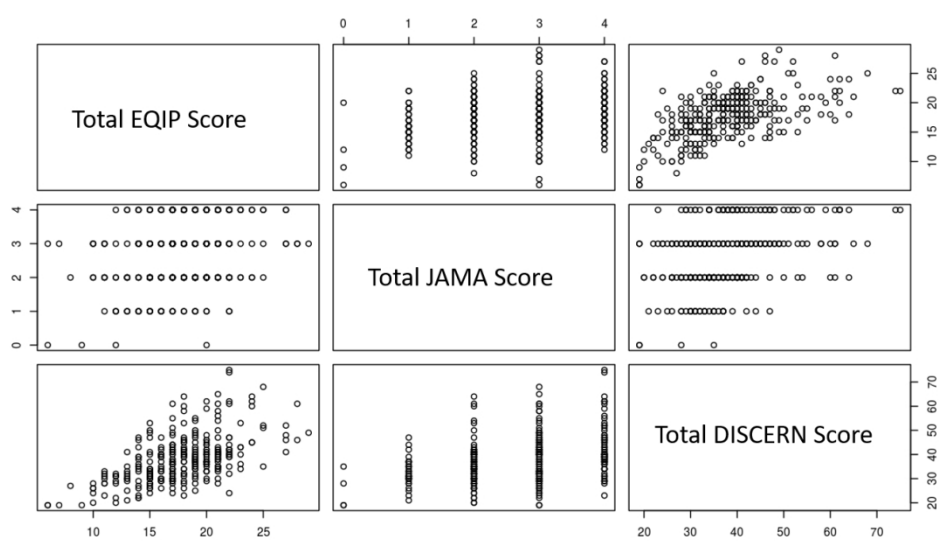

238x141mm (150 x 150 DPI)



1  
2  
3  
4  
5  
6  
7  
8  
9  
10  
11  
12  
13  
14  
15  
16  
17  
18  
19  
20  
21  
22  
23  
24  
25  
26  
27  
28  
29  
30  
31  
32  
33  
34  
35  
36  
37  
38  
39  
40  
41  
42  
43  
44  
45  
46  
47  
48  
49  
50  
51  
52  
53  
54  
55  
56  
57  
58  
59  
60

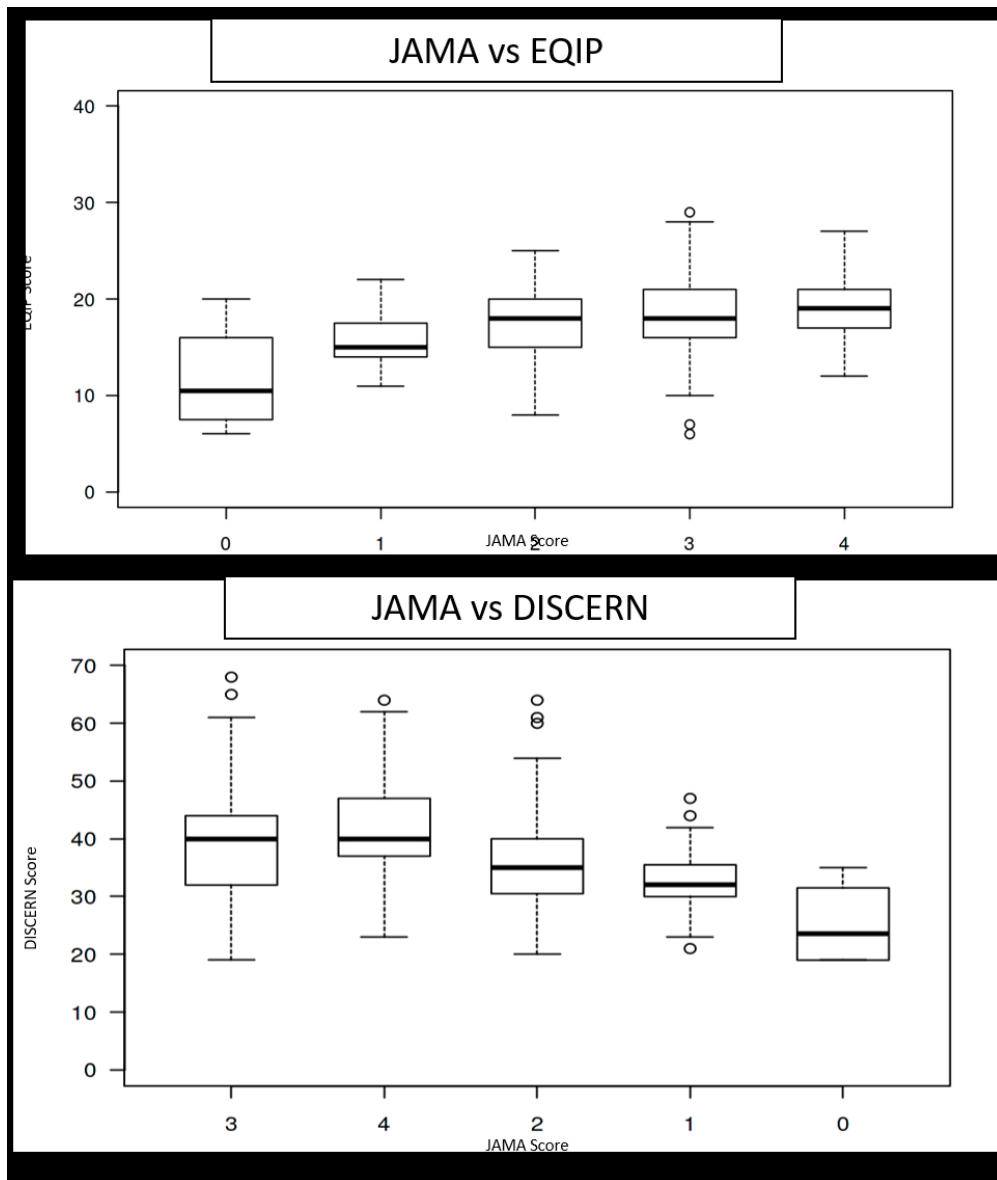

163x191mm (150 x 150 DPI)

1  
2  
3  
4  
5  
6  
7  
8  
9  
10  
11  
12  
13  
14  
15  
16  
17  
18  
19  
20  
21  
22  
23  
24  
25  
26  
27  
28  
29  
30  
31  
32  
33  
34  
35  
36  
37  
38  
39  
40  
41  
42  
43  
44  
45  
46  
47  
48  
49  
50  
51  
52  
53  
54  
55  
56  
57  
58  
59  
60

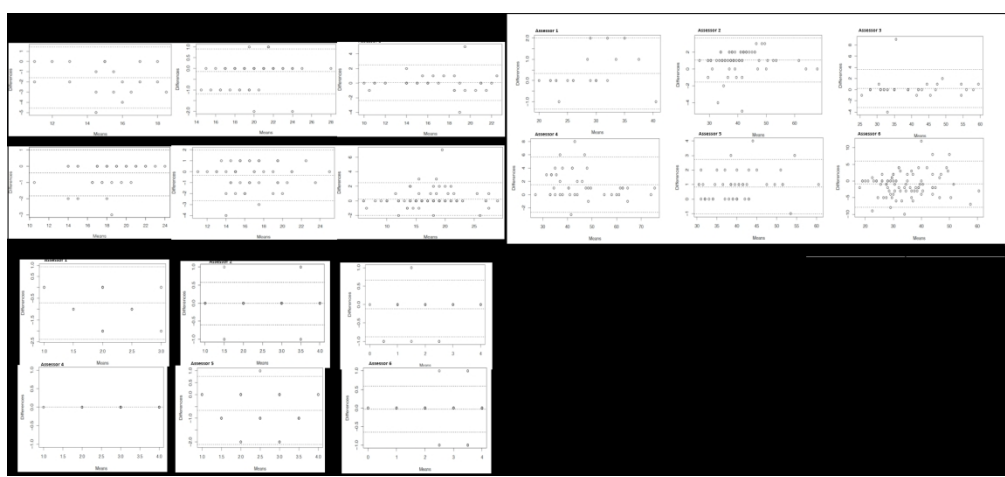

333x154mm (150 x 150 DPI)

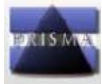

# PRISMA 2009 Checklist

| Section/topic                      | #  | Checklist item                                                                                                                                                                                                                                                                                              | Reported on page # |
|------------------------------------|----|-------------------------------------------------------------------------------------------------------------------------------------------------------------------------------------------------------------------------------------------------------------------------------------------------------------|--------------------|
| <b>TITLE</b>                       |    |                                                                                                                                                                                                                                                                                                             |                    |
| Title                              | 1  | Identify the report as a systematic review, meta-analysis, or both.                                                                                                                                                                                                                                         | 2                  |
| <b>ABSTRACT</b>                    |    |                                                                                                                                                                                                                                                                                                             |                    |
| Structured summary                 | 2  | Provide a structured summary including, as applicable: background; objectives; data sources; study eligibility criteria, participants, and interventions; study appraisal and synthesis methods; results; limitations; conclusions and implications of key findings; systematic review registration number. | 3                  |
| <b>INTRODUCTION</b>                |    |                                                                                                                                                                                                                                                                                                             |                    |
| Rationale                          | 3  | Describe the rationale for the review in the context of what is already known.                                                                                                                                                                                                                              | 4-7                |
| Objectives                         | 4  | Provide an explicit statement of questions being addressed with reference to participants, interventions, comparisons, outcomes, and study design (PICOS).                                                                                                                                                  | 4-7                |
| <b>METHODS</b>                     |    |                                                                                                                                                                                                                                                                                                             |                    |
| Protocol and registration          | 5  | Indicate if a review protocol exists, if and where it can be accessed (e.g., Web address), and, if available, provide registration information including registration number.                                                                                                                               | 7-8                |
| Eligibility criteria               | 6  | Specify study characteristics (e.g., PICOS, length of follow-up) and report characteristics (e.g., years considered, language, publication status) used as criteria for eligibility, giving rationale.                                                                                                      | 7-9                |
| Information sources                | 7  | Describe all information sources (e.g., databases with dates of coverage, contact with study authors to identify additional studies) in the search and date last searched.                                                                                                                                  | 7-9                |
| Search                             | 8  | Present full electronic search strategy for at least one database, including any limits used, such that it could be repeated.                                                                                                                                                                               | 7-9                |
| Study selection                    | 9  | State the process for selecting studies (i.e., screening, eligibility, included in systematic review, and, if applicable, included in the meta-analysis).                                                                                                                                                   | 6-9                |
| Data collection process            | 10 | Describe method of data extraction from reports (e.g., piloted forms, independently, in duplicate) and any processes for obtaining and confirming data from investigators.                                                                                                                                  | 8-12               |
| Data items                         | 11 | List and define all variables for which data were sought (e.g., PICOS, funding sources) and any assumptions and simplifications made.                                                                                                                                                                       | 8-12               |
| Risk of bias in individual studies | 12 | Describe methods used for assessing risk of bias of individual studies (including specification of whether this was done at the study or outcome level), and how this information is to be used in any data synthesis.                                                                                      | 12                 |
| Summary measures                   | 13 | State the principal summary measures (e.g., risk ratio, difference in means).                                                                                                                                                                                                                               | 8-12               |
| Synthesis of results               | 14 | Describe the methods of handling data and combining results of studies, if done, including measures of consistency (e.g., I <sup>2</sup> ) for each meta-analysis.                                                                                                                                          | 12                 |



# PRISMA 2009 Checklist

Page 1 of 2

| Section/topic                 | #  | Checklist item                                                                                                                                                                                           | Reported on page # |
|-------------------------------|----|----------------------------------------------------------------------------------------------------------------------------------------------------------------------------------------------------------|--------------------|
| Risk of bias across studies   | 15 | Specify any assessment of risk of bias that may affect the cumulative evidence (e.g., publication bias, selective reporting within studies).                                                             | N/A                |
| Additional analyses           | 16 | Describe methods of additional analyses (e.g., sensitivity or subgroup analyses, meta-regression), if done, indicating which were pre-specified.                                                         | N/A                |
| <b>RESULTS</b>                |    |                                                                                                                                                                                                          |                    |
| Study selection               | 17 | Give numbers of studies screened, assessed for eligibility, and included in the review, with reasons for exclusions at each stage, ideally with a flow diagram.                                          | 12, Figure 2       |
| Study characteristics         | 18 | For each study, present characteristics for which data were extracted (e.g., study size, PICOS, follow-up period) and provide the citations.                                                             | 12-13              |
| Risk of bias within studies   | 19 | Present data on risk of bias of each study and, if available, any outcome level assessment (see item 12).                                                                                                | 15                 |
| Results of individual studies | 20 | For all outcomes considered (benefits or harms), present, for each study: (a) simple summary data for each intervention group (b) effect estimates and confidence intervals, ideally with a forest plot. | N/A                |
| Synthesis of results          | 21 | Present results of each meta-analysis done, including confidence intervals and measures of consistency.                                                                                                  | N/A                |
| Risk of bias across studies   | 22 | Present results of any assessment of risk of bias across studies (see Item 15).                                                                                                                          | N/A                |
| Additional analysis           | 23 | Give results of additional analyses, if done (e.g., sensitivity or subgroup analyses, meta-regression [see Item 16]).                                                                                    | 10-14              |
| <b>DISCUSSION</b>             |    |                                                                                                                                                                                                          |                    |
| Summary of evidence           | 24 | Summarize the main findings including the strength of evidence for each main outcome; consider their relevance to key groups (e.g., healthcare providers, users, and policy makers).                     | 16-24              |
| Limitations                   | 25 | Discuss limitations at study and outcome level (e.g., risk of bias), and at review-level (e.g., incomplete retrieval of identified research, reporting bias).                                            | 24-25              |
| Conclusions                   | 26 | Provide a general interpretation of the results in the context of other evidence, and implications for future research.                                                                                  | 24                 |
| <b>FUNDING</b>                |    |                                                                                                                                                                                                          |                    |
| Funding                       | 27 | Describe sources of funding for the systematic review and other support (e.g., supply of data); role of funders for the systematic review.                                                               | 2                  |

From: Moher D, Liberati A, Tetzlaff J, Altman DG, The PRISMA Group (2009). Preferred Reporting Items for Systematic Reviews and Meta-Analyses: The PRISMA Statement. PLoS Med 6(7): e1000097. doi:10.1371/journal.pmed1000097

For more information, visit: [www.prisma-statement.org](http://www.prisma-statement.org).

# BMJ Open

## COVID-19 prevention and treatment information on the Internet: a systematic analysis and quality assessment

|                                 |                                                                                                                                                                                                                                                                                                                                                                                                                                                                                                                                                                                                |
|---------------------------------|------------------------------------------------------------------------------------------------------------------------------------------------------------------------------------------------------------------------------------------------------------------------------------------------------------------------------------------------------------------------------------------------------------------------------------------------------------------------------------------------------------------------------------------------------------------------------------------------|
| Journal:                        | <i>BMJ Open</i>                                                                                                                                                                                                                                                                                                                                                                                                                                                                                                                                                                                |
| Manuscript ID                   | bmjopen-2020-040487.R2                                                                                                                                                                                                                                                                                                                                                                                                                                                                                                                                                                         |
| Article Type:                   | Original research                                                                                                                                                                                                                                                                                                                                                                                                                                                                                                                                                                              |
| Date Submitted by the Author:   | 31-Aug-2020                                                                                                                                                                                                                                                                                                                                                                                                                                                                                                                                                                                    |
| Complete List of Authors:       | Fan, Ka Siu; St George's University Hospitals NHS Foundation Trust, Ghani, Shahi; St George's University Hospitals NHS Foundation Trust Machairas, Nikolaos ; Royal Free Hospital, Department of HPB Surgery and Liver Transplant<br>Lenti, Lorenzo; St George's University Hospitals NHS Foundation Trust<br>Fan, Ka Hay; Imperial College London<br>Richardson, Daniel; St George's University Hospitals NHS Foundation Trust<br>Scott, Aneya; St George's University Hospitals NHS Foundation Trust<br>Raptis, Dimitri; Royal Free Hospital, Department of HPB Surgery and Liver Transplant |
| <b>Primary Subject Heading</b>: | Health informatics                                                                                                                                                                                                                                                                                                                                                                                                                                                                                                                                                                             |
| Secondary Subject Heading:      | Infectious diseases, Patient-centred medicine, Public health                                                                                                                                                                                                                                                                                                                                                                                                                                                                                                                                   |
| Keywords:                       | World Wide Web technology < BIOTECHNOLOGY & BIOINFORMATICS, Health informatics < BIOTECHNOLOGY & BIOINFORMATICS, JOURNALISM (see Medical Journalism)                                                                                                                                                                                                                                                                                                                                                                                                                                           |
|                                 |                                                                                                                                                                                                                                                                                                                                                                                                                                                                                                                                                                                                |

SCHOLARONE™  
Manuscripts



I, the Submitting Author has the right to grant and does grant on behalf of all authors of the Work (as defined in the below author licence), an exclusive licence and/or a non-exclusive licence for contributions from authors who are: i) UK Crown employees; ii) where BMJ has agreed a CC-BY licence shall apply, and/or iii) in accordance with the terms applicable for US Federal Government officers or employees acting as part of their official duties; on a worldwide, perpetual, irrevocable, royalty-free basis to BMJ Publishing Group Ltd ("BMJ") its licensees and where the relevant Journal is co-owned by BMJ to the co-owners of the Journal, to publish the Work in this journal and any other BMJ products and to exploit all rights, as set out in our [licence](#).

The Submitting Author accepts and understands that any supply made under these terms is made by BMJ to the Submitting Author unless you are acting as an employee on behalf of your employer or a postgraduate student of an affiliated institution which is paying any applicable article publishing charge ("APC") for Open Access articles. Where the Submitting Author wishes to make the Work available on an Open Access basis (and intends to pay the relevant APC), the terms of reuse of such Open Access shall be governed by a Creative Commons licence – details of these licences and which [Creative Commons](#) licence will apply to this Work are set out in our licence referred to above.

Other than as permitted in any relevant BMJ Author's Self Archiving Policies, I confirm this Work has not been accepted for publication elsewhere, is not being considered for publication elsewhere and does not duplicate material already published. I confirm all authors consent to publication of this Work and authorise the granting of this licence.

1  
2  
3 **COVID-19 prevention and treatment information on the Internet: a systematic analysis**  
4  
5 **and quality assessment**  
6

7 Ka Siu Fan, BSc\*<sup>1</sup>, Shahi Abdul Ghani, MSc, DHMSA\*<sup>1</sup>, Nikolaos Machairas, MD, PhD<sup>2</sup>,  
8 Lorenzo Lenti, BSc<sup>1</sup>, Ka Hay Fan<sup>3</sup>, Daniel Richardson, BSc<sup>1</sup>, Aneya Scott, MChem<sup>1</sup>, Dimitri  
9 Aristotle Raptis MD, MSc, PhD<sup>2</sup>  
10  
11  
12

13 \*Ka Siu Fan and Shahi Abdul Ghani contributed equally to this paper.

- 14  
15  
16 1. St. Georges University of London, UK  
17  
18 2. Department of HPB Surgery and Liver Transplant, Royal Free Hospital, London, UK  
19  
20 3. Imperial College London, UK  
21  
22

23  
24 **Corresponding author:**  
25

26 Dr Dimitri Aristotle Raptis MD, MSc, PhD  
27  
28 Department of HPB Surgery and Liver Transplant  
29  
30 Royal Free Hospital, London, UK  
31  
32 [Dimitri.Raptis@NHS.net](mailto:Dimitri.Raptis@NHS.net)  
33  
34  
35  
36

37 **Conflict of interest:** The authors have no conflicts of interests or funding sources to disclose  
38  
39  
40

41 **Acknowledgements:** None  
42  
43  
44

45 **Statement of Author Contribution:**  
46

47 Study conception and design: DAR, NM, SAG, KSF  
48  
49 Acquisition of data: SAG, KSF, LL, KHF, DR, AS  
50  
51 Analysis and interpretation of data: KSF, SAG, NM, DAR  
52  
53 Drafting of manuscript: KSF, SAG, NM, KHF  
54  
55 Critical revision: KSF, SAG, NM, DAR  
56  
57  
58  
59

60 **Word count:** 6297

1  
2  
3  
4  
5  
6  
7  
8  
9  
10  
11  
12  
13  
14  
15  
16  
17  
18  
19  
20  
21  
22  
23  
24  
25  
26  
27  
28  
29  
30  
31  
32  
33  
34  
35  
36  
37  
38  
39  
40  
41  
42  
43  
44  
45  
46  
47  
48  
49  
50  
51  
52  
53  
54  
55  
56  
57  
58  
59  
60

**Keywords:** Coronavirus, Internet, Patient Education Handout, Public Health Informatics,  
Search Engine

For peer review only



## Abstract

**Objective:** To evaluate the quality of information regarding the prevention and treatment of COVID-19 available to the general public from all countries.

**Design:** Systematic analysis using the 'Ensuring Quality Information for Patients' (EQIP) tool (score 0-36), JAMA benchmark (score 0-4) and the DISCERN tool (score 16-80) to analyse websites containing information targeted at the general public.

**Data Sources:** Twelve popular search-terms, including 'Coronavirus', 'COVID 19', 'Wuhan virus', 'How to treat coronavirus' and 'COVID 19 Prevention' were identified by 'Google AdWords' and 'Google Trends'. Unique links from the first 10 pages for each search-term were identified and evaluated on its quality of information.

**Eligibility Criteria for selecting studies:** All websites written in the English language, and provides information on prevention or treatment of COVID-19 intended for the general public were considered eligible. Any websites intended for professionals, or specific isolated populations, such as students from one particular school, were excluded, as well as websites with only video content, marketing content, daily caseload update or news dashboard pages with no health information.

**Results:** Of the 1275 identified websites, 321 (25%) were eligible for analysis. The overall EQIP, JAMA and DISCERN scores were 17.8, 2.7 and 38.0. Websites originated from 34 countries, with the majority from the USA (55%). News Services (50%) and Government/Health Departments (27%) were the most common sources of information and their information quality varied significantly. Majority of websites discuss prevention alone despite popular search trends of COVID-19 treatment. Websites discussing both prevention and treatment (n=73, 23%) score significantly higher across all tools ( $P<0.001$ ).

**Conclusion:** This comprehensive assessment of online COVID-19 information using EQIP, JAMA and DISCERN tools indicate that most websites were inadequate. This necessitates improvements in online resources to facilitate public health measures during the pandemic.

### Strengths and limitations of this study

- Over 1200 websites were identified by using 12 search-terms to improve the representativeness of returned COVID-19 websites.
- A comprehensive analysis can be achieved using a combination of modified 'Ensuring Quality Information for Patients' (EQIP) tool, JAMA benchmark and the DISCERN tool, all of which are respected and validated health information assessment tools.
- Representativeness of search results of the Google search engine may be influenced by geographical factors and may differ when performed elsewhere.
- Video-based health content was not within our scope and may provide a more comprehensive analysis of all online health information on COVID-19.
- This study provides a snapshot of online health information as information on the Internet is constantly changing.

Review only

## Introduction

With the increasing popularity of the Internet, both the accessibility and availability of health information grew drastically and has now become a primary source of information for many.[1,2] It is known that health information-seeking behaviour also applies to the use of online resources and is ever more important during the current Coronavirus disease 2019 (COVID-19) pandemic.[3] Information on such a widely-discussed topic will inevitably be vast and vary in production quality, potentially adversely affecting patient awareness and health-seeking behaviour.[4] Many of these resources read by the public may be unreliable or produced from non-peer-reviewed sources and affect behaviours such as recognition of symptoms, taking appropriate preventative precautions or seeking timely treatment.[3,5,6] Furthermore, inaccurate online information may contradict healthcare professionals and potentially compromise the trusting relationship with patients, worsening outcomes.[7]

Since the declaration of COVID-19 as a pandemic on 12th March 2020, its prevalence and mortality have continued to rise[8–10] and lead to the introduction of various measures such as social distancing, quarantine procedures and lockdown protocols.[11] As evidenced by previous outbreaks, effective public education and public health intervention rely on access to health information[12,13], which is now primarily delivered through the Internet. Many countries have since introduced lockdown and quarantine protocols as their mainstay preventative measures[14] but public health continues to be threatened by certain populations.[15] Due to both the novelty and rapid developments of COVID-19, there is a significant barrier against the critical appraisal of online resources and, hence, necessitates a quantitative evaluation of the popular information sources available to the wider public.

Many instruments have been developed to evaluate patient information and may also be applied to online COVID-19 information.[16] The modified Ensuring Quality of Information for Patients (EQIP) tool is a reproducible modality used in previous studies to evaluate the reliability and quality of all information types, providing a robust assessment of quality,

1  
2  
3 readability and design aspects of any written information[17–19]. Previously, our group  
4 evaluated online information using the modified EQIP tool in a variety of conditions and  
5 procedures including bariatric surgery[20], Dupuytren's disease[21], carpal tunnel disease[22],  
6 breast augmentation[23], liposuction[17] and liver transplantation[24]. The Minervation  
7 validation instrument (LIDA)[25], Flesch Reading Ease (FRE) Score and the Flesch-Kincaid  
8 Grade (FKG) have also been used to evaluate the quality of online health information.[26]  
9 However, they are not considered appropriate here as only readability and the website design  
10 are assessed, both of which are adequately covered by EQIP.[27] Tools such as the Journal  
11 of American Medical Association (JAMA) benchmark and the DISCERN tool (no acronym)  
12 have also been used to evaluate online health information and their combinational use can  
13 provide a more comprehensive evaluation.[19,28,29] The Internet has become an ever-  
14 important source of information and can determine health-seeking behaviour, which ultimately  
15 affects the progression of COVID-19. Hence, our study aims to assess the quality of  
16 information of top indexed websites that discuss information, prevention, or treatment of  
17 COVID-19 using the modified EQIP tool, JAMA benchmark and DISCERN tool.  
18  
19  
20  
21  
22  
23  
24  
25  
26  
27  
28  
29  
30  
31  
32  
33  
34  
35  
36

## 37 **Methods**

### 38 **Eligibility criteria, information sources and data selection**

39 On 27<sup>th</sup> March 2020, 12 search-terms and phrases were queried on the most used search  
40 engine, Google[30–32], to obtain a database of websites. Only Google was used as previous  
41 studies have shown that the use of multiple search engines will only provide duplicate results.  
42 To increase the number of results, more search-terms were used: 'Coronavirus', 'COVID 19',  
43 'Stop getting Coronavirus', 'Corona Virus', 'How to treat coronavirus', 'Coronavirus safety tips',  
44 'Drugs for coronavirus', 'What is self isolation coronavirus', 'China virus', 'Wuhan virus',  
45 'Coronavirus Medicine' and 'COVID 19 prevention'. These were commonly searched phrases  
46 identified using the 'Google Adwords Keyword Planner'[33]. Google AdWords allows the input  
47 of a term (in this case coronavirus) which then provides popular related keyword suggestions.  
48 The most popular search-terms were 'Coronavirus', followed by 'COVID' and 'Corona Virus'  
49  
50  
51  
52  
53  
54  
55  
56  
57  
58  
59  
60

1  
2  
3 and their respective search popularity peaked in mid- and late-March 2020 respectively.  
4  
5 **Figure 1** summarises the most popular search trends. Only the first 10 pages of unique  
6  
7 websites were identified and recorded as previous work suggests patients tend to stay within  
8  
9 the first 100 returned webpages[18,24]. Various search-terms and their relative popularity  
10  
11 were also collected directly from Google Trends[34] for further comparative analysis.  
12  
13

14  
15 All websites written in the English language and providing information on prevention or  
16  
17 treatment of COVID-19 intended for the general public or COVID-19 patients were considered  
18  
19 eligible for inclusion. Any subsidiary pages or subdirectories of a website that contained  
20  
21 information for the public and were easily accessible were also assessed. Websites or articles  
22  
23 intended for professionals or specific population subsets, such as students alone, were  
24  
25 excluded. Weblinks to purely video content, marketing content, daily caseload update or news  
26  
27 dashboard pages with no educational purposes were excluded. The creation of the website  
28  
29 database, eligibility assessment, website assessment and statistical analysis was performed  
30  
31 between March and April 2020.  
32  
33

### 34 35 36 **Website Scraping**

37  
38 A website scraping tool was developed to identify and record all unique websites from the first  
39  
40 10 pages of Google results. The tool utilises custom PHP to make HTTP requests to the  
41  
42 search engine to mimic the requests made by the public. The queries were made from a server  
43  
44 located in Texas, USA but no preferences were made to limit searches by geographical region.  
45  
46 The tool makes repeated requests, logs the first 10 pages of unique URLs and outputs the  
47  
48 dataset after excluding all duplicate links within each search-term. A minority of websites were  
49  
50 restricted by General Data Protection Regulation (GDPR) and were accessed through the use  
51  
52 of virtual private networks (VPN) as any websites that could reasonably be accessed by the  
53  
54 general public were included.  
55  
56  
57  
58  
59

### 60 **Data entry**

1  
2  
3 Six assessors, (KSF, SAG, KHF, LL, AS and DR), all of whom fluent in English, independently  
4 assessed the websites between 30 March and 13 April 2020. The evaluation included 36 EQIP  
5 items and four items on JAMA benchmark, all assessed through 'Yes, No or N/A' questions.  
6  
7 DISCERN tool adds a further 16 items to assess reliability and quality of treatment information  
8 using scales of 1 to 5. Assessors also recorded the country of origin, and type of source:  
9 Academic Centre, Charity/Non-Governmental Organisation, Encyclopaedia,  
10 Government/Health Department, Hospital, Industry, News Service, Patient Group,  
11 Practitioner, and Professional Society. Organisations that primarily serve patients, such as  
12 Patient.info, is considered a 'Patient Group' whereas non-governmental organisations that  
13 oversee a broader demographic, like Red Cross and World Health Organization (WHO), are  
14 classified as 'Charity/Non-Governmental Organisation'. News service includes both primary  
15 and secondary news articles that are not written for professionals. 'Practitioner' considers the  
16 for-profit webpages of individual medical practitioners, whereas 'Industry' considers any for-  
17 profit organisation within the medical industry. 'Academic Centres' consider all sources from  
18 academic institutions, while 'Professional Society' refer to non-profit groups of healthcare  
19 professionals. Qualitative information about preventative methods and treatment was also  
20 recorded. After the initial round of data entry, each website was verified on a second-round  
21 between 14 April and 21 April by a verifier with previous experience performing data entry for  
22 the evaluation of patient health information.  
23  
24  
25  
26  
27  
28  
29  
30  
31  
32  
33  
34  
35  
36  
37  
38  
39  
40  
41  
42  
43  
44

### 45 **EQIP Tool**

46  
47 The Ensuring Quality Information for Patients (EQIP) tool consists of 20 items, acting as a  
48 checklist for criteria such as quality of written work, design and coherence.[35] More recently,  
49 modifications were made to the EQIP tool, expanding the criteria to 36 items[36]. This serves  
50 to satisfy both the guidelines of British Medical Association (BMA)[37] and International Patient  
51 Decision Aids Standards (IPDAS) collaboration[38] on the ideal patient information and the  
52 modified EQIP tool have been utilised in a variety of specialities previously.[17–19] A decision  
53 was made to use the modified EQIP tool as the inclusion of 'partly yes' in the original EQIP  
54  
55  
56  
57  
58  
59  
60

1  
2  
3 introduces subjectivity into the responses and has been shown to lower its reliability.[24,35]  
4  
5 36 items across three domains were included: Content (items 1-18), Identification (items 19-  
6  
7 24) and Structure (items 25-36). Similar to previous uses, 'Yes/No' binary questions reduce  
8  
9 assessor subjectivity in partial answers. 'N/A' option was also included if items were not  
10  
11 relevant for the type of source. The Content domain assesses whether an adequate amount  
12  
13 of information is included in an article, ranging from a description of the medical problem itself  
14  
15 (items 1-3,11,14) to the details of its management and complications (items 4-11).  
16  
17 Identification domain assesses how well a website displays its production details, including  
18  
19 date of issue, author, finance sources and bibliography (items 19-24). Structure domain  
20  
21 evaluates the readability of a website and how well it accommodates its audience, such as  
22  
23 delivering information through short, non-contradictory statements arranged in a logical layout  
24  
25 (items 25-36). As COVID-19 is an emergent disease, certain items are tailored to  
26  
27 accommodate for the limited evidence: describing treatment (item 3) include articles that  
28  
29 address the lack of proven treatment, and alert signs (item 14) include recognised COVID-19  
30  
31 symptoms such as fever, cough and changes in taste or smell. A cut-off point of 75<sup>th</sup> percentile  
32  
33 was set for EQIP score to discriminate between high-scoring from low-scoring websites as  
34  
35 was done in previous studies.  
36  
37  
38  
39  
40  
41

### 42 **JAMA Benchmark**

43  
44 Critical appraisals of Internet resources are also assessed by one of the earliest core  
45  
46 standards identified by JAMA in 1997.[39] This checklist was proposed by Silberg *et al.* to  
47  
48 assist the appraisal and evaluation of the credibility of unregulated Internet resources and  
49  
50 have been used in various studies previously[40,41]. This is evaluated by four items:  
51  
52 Authorship, Attribution, Disclosure and Currency: Authorship requires identification of authors,  
53  
54 their credentials and affiliations; Attribution requires appropriate citations on written  
55  
56 information; Disclosure requires transparency of the website owner and conflicts of interests;  
57  
58  
59  
60

1  
2  
3 Currency requires a clear indication of the date of publication and updates. Similarly, the  
4  
5 'Yes/No' criterion is implemented to reduce the subjectivity of partial answers.  
6  
7  
8

### 9 **DISCERN Tool**

10  
11 The DISCERN evaluation tool was first developed in 1998 at Oxford to judge the quality of  
12  
13 information regarding treatment choices.[42] This tool has been validated and used across  
14  
15 various specialities to assess treatment information.[29,40,43] This consisted of 16 items to  
16  
17 assess both the reliability and level of detail on treatments as well as the overall quality of the  
18  
19 information. The reliability section (items 1-8) evaluates the ability of a website to achieve its  
20  
21 aims while remaining unbiased and providing its sources of information. Quality section (items  
22  
23 9-15) evaluates the content specifically for describing the rationale, methods and alternatives  
24  
25 to the current management of a disease. Criteria for treatment section was adjusted to  
26  
27 accommodate the treatment uncertainty and items are considered fulfilled as long as the  
28  
29 website discusses the relevant information with regards to potential drugs or interventions  
30  
31 such as assisted ventilation. A score between 1 and 5 can be assigned to each item, with 1  
32  
33 being 'No', 3 being 'Partial' and 5 being 'Yes'. To improve assessment accuracy, overall quality  
34  
35 of information will be scored in proportion to the mean scores calculated from the answers to  
36  
37 items 1-15, with 1 being the lowest and 5 being the highest.  
38  
39  
40  
41  
42

### 43 **Additional Items**

44  
45 Additional items were included to further assess the websites, including whether a website  
46  
47 discussed prevention methods, current treatments and the role of empirical evidence in the  
48  
49 prevention or treatment for COVID-19. Data collected were in the form of 'Yes/No' to reduce  
50  
51 the ambiguity of partial answers. Additionally, details provided by the website on these items  
52  
53 were recorded if the item scores 'Yes'. Websites were further analysed by whether their  
54  
55 purpose is prevention, treatment, or both.  
56  
57  
58  
59  
60

### **Statistical Analysis**



1  
2  
3 The dataset consisted of both continuous and categorical variables, which are reported as the  
4 mean, median and interquartile range (IQR) as well as numbers and percentages respectively.  
5  
6 High-scoring websites are identified as those with scores above the 75<sup>th</sup> percentile for all three  
7  
8 tools. Kruskal-Wallis tests were used for the analysis of continuous variables where  
9  
10 appropriate and intraclass correlation coefficient (ICC) was calculated to identify the  
11  
12 correlation between website analysis test methods. Fisher's or  $\chi^2$  tests were used to analyse  
13  
14 proportions where appropriate. Inter-rater reliability of each assessor was evaluated using  
15  
16 Bland-Altman plots. All P values were two-tailed and considered significant when  $P < 0.05$ . R  
17  
18 version 3.3.2 (R Core Team, GNU GPL v2 License), R Studio version 1.0.44 (RStudio, Inc.  
19  
20 GNU Affero General Public License v3, Boston, MA, 2016) and their respective graphical user  
21  
22 interface (GUI) rBiostatistics.com (rBiostatistics.com, London, Switzerland, 2017)[44] was  
23  
24 used to perform the statistical analysis.  
25  
26  
27  
28  
29

### 30 **Patient and Public Involvement**

31  
32 There was no patient or public involvement in the conception, design or data collection of the  
33  
34 study or the production of the manuscript.  
35  
36  
37  
38  
39  
40

## 41 **Results**

### 42 **Gathering of websites with information on COVID-19, its prevention and its** 43 **management**

44  
45 A database of websites was gathered from the first 10 pages of unique URLs returned using  
46  
47 the 12 search-terms. The final dataset included 1275 URLs. After filtering out duplicate results  
48  
49 and websites that failed to meet our inclusion criteria, 321 remained eligible for analysis. The  
50  
51 workflow of dataset creation is shown in **Figure 2**. The list of websites was obtained on a  
52  
53 single day, 27<sup>th</sup> March 2020, and website evaluation was completed within two weeks.  
54  
55  
56  
57  
58  
59

### 60 **Website demographics and search trends**

1  
2  
3 COVID-19-specific searches regarding treatment and masks were significantly more popular  
4 (P<0.001) than prevention and peaked in mid-March and early-April respectively. The returned  
5 websites originated from 34 different countries (**Figure 3 and 4**): the USA produced the most  
6 websites (n=178), followed by the United Kingdom (n=52), Australia (n=18) and Canada  
7 (n=18). However, no statistically significant differences were observed between the four  
8 countries across all tools. The source of information and website category is shown in **Table**  
9  
10  
11  
12  
13  
14  
15  
16 **1. News Services** were the most common source of information (n=163), followed by Health  
17 Departments/Government (n=87).  
18  
19

20  
21  
22 Forty-six websites (14.3%) described treatment methods alone, 202 websites (62.9%)  
23 mentioned treatment methods alone and 73 websites (22.7%) discussed both. Of the  
24 prevention websites, 205 (63.9%) described social isolation, 169 (52.7%) physical distancing,  
25 157 (48.9%) advised staying home and 136 (42.4%) described the benefits of disinfecting or  
26 cleaning surfaces. Of those that discussed treatment, 55 (17.1%) described the use of antiviral  
27 medications, 31 (9.7%) described hydroxychloroquine or chloroquine and 26 (8.1%) described  
28 the use of non-steroidal anti-inflammatory drugs such as paracetamol and ibuprofen. Only 31  
29 (9.7%) websites discussed the use of oxygen, ventilation or fluids as a possible treatment  
30 method.  
31  
32  
33  
34  
35  
36  
37  
38  
39  
40  
41  
42

### 43 **Overall performance**

44  
45 The mean total score for EQIP, JAMA and DISCERN are 17.78, 2.69 and 38.00 respectively,  
46 with a respective 75<sup>th</sup> percentile high-score cut-offs of 21, 4 and 43. No website achieved the  
47 maximum score for EQIP Content (out of 18) or Structure (out of 6) domain but one website  
48 did attain the maximum for EQIP Identification (out of 12). Seventy-four websites fulfilled all  
49 four JAMA criteria. Four websites achieved the maximum for DISCERN Reliability (out of 40)  
50 but none scored fully in DISCERN Treatment (out of 40). 74 high-scoring websites were  
51 identified for EQIP and JAMA and 76 for DISCERN tool. The mean scores of high- and low-  
52 scoring websites for each tool and domain are as follows: EQIP Content (9.99 vs 6.07;  
53  
54  
55  
56  
57  
58  
59  
60

1  
2  
3 P<0.001), EQIP Identification (4.03 vs 3.34; P<0.001), EQIP Structure (8.45 vs 6.96;  
4 P<0.001), Total EQIP (22.46 vs 16.37; P<0.001), Total JAMA (4.00 vs 2.30; P<0.001),  
5 DISCERN Reliability (31.72 vs 25.44; P<0.001), DISCERN Treatment (13.49 vs 10.31;  
6 P=0.002) and Total DISCERN (45.21 vs 35.76; P<0.001).  
7  
8  
9  
10

11  
12  
13 All tools and subsequent domains, except DISCERN Reliability and Total DISCERN scores,  
14 varied significantly between websites of different sources, notably with the Encyclopaedia  
15 (n=5) cohort holding the highest score across all domains. All tools and domains varied  
16 between website cohorts, with websites that discussed both Prevention and Treatment scoring  
17 above the mean values. **Table 2** and **Table 3** summarises the variation of information quality  
18 with the source of information and website category respectively. A detailed breakdown of the  
19 performance of each tool is displayed in **Supplementary Table 1, 2 and 3**.  
20  
21  
22  
23  
24  
25  
26  
27  
28  
29

### 30 **Subset analysis of Government/Health Department and News Services**

31  
32 Collectively, 250 (77.9%) of all web links were either Government/Health Departments and  
33 News Services websites, of which 121 (37.7%) were based in the USA. Globally, there is  
34 significant variation between Government/Health Departments and News Services in EQIP  
35 Content (mean 8.11 vs 6.22; P<0.001), Total EQIP (mean 18.90 vs 17.06; P<0.001), Total  
36 JAMA (mean 2.16 vs 2.98; P<0.001) and DISCERN Treatment (mean 9.02 vs 11.72;  
37 P=0.001). Variations in US websites were similar except for EQIP structure (P=0.148). The  
38 US-based cohort scored lower in Total EQIP than the global cohort but USA News Services  
39 specifically scored higher in Total JAMA (3.17 vs 2.98) and Total DISCERN (39.25 vs 38.04).  
40  
41  
42  
43  
44  
45  
46  
47  
48  
49  
50 Breakdowns of comparison between the cohorts are provided in **Table 4**.  
51

### 52 **High-scoring websites**

53  
54 Sixteen websites scored above 75<sup>th</sup> percentile across all three evaluation tools, 13 were from  
55 the USA, 2 from the UK and 1 from Canada. Most were from News Services (n=10), followed  
56 by industry (n=4), Encyclopaedia (n=1) and Government/Health Departments (n=1). The top  
57  
58  
59  
60

1  
2  
3 5 websites with the highest Total EQIP and Total DISCERN scores are shown in **Table 5** with  
4 their respective breakdowns. Top JAMA websites were not shown as there were 74 that  
5 scored the full four points.  
6  
7  
8

### 9 10 11 **Intraclass correlation between tools**

12 Intraclass correlation (ICC) between the 3 analysis tools is provided in **Supplementary Figure**

13 **1**. The ICC between all three tools was moderate to high at 0.48 (95% CI 0.37-0.56).

14 Furthermore, as the JAMA benchmark only offers four scoring variations, the Kruskal-Wallis  
15 analysis is used to correlate JAMA with EQIP and DISCERN. The results are shown in

16 **Supplementary Figure 2** and demonstrate statistically significant moderate-high correlation  
17 for both JAMA-EQIP and JAMA-DISCERN.  
18  
19  
20  
21  
22  
23  
24  
25  
26  
27

### 28 **Inter-rater reliability**

29 The biases of each tool and assessor are within 95% CI interval limits. The Bland-Altman plots  
30 and individual degree of bias have been provided in **Supplementary Figure 3**. The mean  
31 degree of bias and 95% confidence intervals for each assessor is identified. Mean bias for  
32 EQIP, JAMA and DISCERN were -0.36, +0.29 and +0.51 respectively. Bias for each assessor,  
33 within each tool, was minimal and falls within their respective 95% CI.  
34  
35  
36  
37  
38  
39  
40  
41  
42

### 43 **Discussion**

44 To our knowledge, this is the first study to evaluate the content intended for the public seeking  
45 information for preventing or treating of COVID-19. Our search-terms included various  
46 synonyms of COVID-19 and “open” search-terms to capture the majority of materials related  
47 to our study. While no tools are validated to assess information specifically during pandemics;  
48 this study used a combination of EQIP, JAMA and DISCERN. The combined scope and  
49 efficacy of these tools enable a comprehensive evaluation of all the important aspects for a  
50 layperson seeking health information from articles; namely readability, coherence, design and  
51 quality of information.  
52  
53  
54  
55  
56  
57  
58  
59  
60

## Evaluation of the websites

We determined the quality of information to be low, as indicated by the low 75<sup>th</sup> percentile cut-offs for EQIP and DISCERN, at 21 and 43 respectively, or 58.3% and 53.8% of their respective full scores. Abundant COVID-19 content is being produced, as evident in **Figure 1**, with the majority being excluded due to its nature rather than inter-term duplications. Most frequently excluded websites were either caseload updates or general news articles lacking information on prevention and treatment.

Websites generally scored poorly, with an EQIP mean and median of 18 (IQR 15-20). Despite fewer marks allocated to Structure, websites generally outperform the Content domain (7.30 vs 6.97), suggesting information quality is less adequate than usability. The indicators assessing referencing quality, such as JAMA benchmark and DISCERN Reliability, scored similarly at 2.69 (67.3% of maximum) and 26.93 (67.3% of maximum) respectively but scored lower in the EQIP Identification domain 3.50 (58.3% of maximum), likely due to more items (i.e. whether patients were involved in the material's production). Generally, high-scoring websites performed better in the Content domain, with odds ratios (OR) between 3-7. The OR was significantly higher for item 4 (defining the purpose of interventions) (OR 27.78; 95% CI 4.695-1000;  $P < 0.001$ ), suggesting that high-scoring websites provided greater reasoning behind preventative and treatment measures. While high-scoring websites scored significantly higher across 23 of the 36 EQIP items, quantitative benefits (item 8) is a notable exception where both cohorts performed poorly (4.1% vs 2.4%; OR 1.695; 95% CI 0.267-8.197;  $P = 0.436$ ), significantly lower than available literature.[18,23,24] This likely reflects the general lack of COVID-19 knowledge compared to previously explored diseases and treatments. High-scoring websites similarly performed better in Identification (OR ranged between 1.312 and 5.376), with the inclusion of bibliography (item 23) differing most (41.89% vs 11.74%; OR 5.376; 95% CI 1.727-7.407;  $P < 0.001$ ) as the majority of websites lacked bibliographies, potentially due to subpar production quality in a high turnover topic. Structure

1  
2  
3 revealed both high- and low-scoring websites to provide clear information (item 30; 98.65% vs  
4 89.88%; OR 8.197; 95% CI 1.294-333.3; P=0.013). High scoring websites provided poor  
5 benefit-risk balancing (item 31; 39.19% vs 10.93%; OR 5.208; 95% CI 2.703-10.101;  
6 P<0.001), as did most other websites assessed (17.5% overall), comparable to existing  
7 studies ranging 11% to 44%. As shown in **Figure 5**, EQIP scores were relatively  
8 homogeneous, ranging from 6 to 29, with the majority between 14-22. Overall performance  
9 agreed with available literature that online health information is inadequate, as median EQIP  
10 scores ranged between 15-19 and IQR ranged 12-20 and 16-22.[18,20,22,23,45]  
11 Furthermore, scores for describing intervention sequence (item 6) and quantitative risks (item  
12 10) were much lower (15.9% and 0.9% respectively) when compared against the study on  
13 gallstone disease (27% and 21% respectively) or liver transplantation (66% and 53%  
14 respectively). This likely reflects the prioritisation of discussing prevention and treatment  
15 method efficacy over treatment sequences and risks. Item 23 also scored poorly, both in itself  
16 and against literature: only 18.7% of websites provided a short bibliography whereas studies  
17 ranged from 19% in liver transplantation to 47% in orthognathic surgery. Interestingly, COVID-  
18 19 websites scored well in dating (item 19; 87.2%) compared literature, likely reflecting the  
19 demanding and time-sensitive nature to understand how the COVID-19 pandemic affects  
20 individuals. Unsurprisingly, encyclopaedias (n= 5) scored the highest in content (10.80),  
21 identification (4.80) domains and overall EQIP (24.20), holding the highest proportion of  
22 websites discussing both prevention and treatment (n=4; 80%). Encyclopaedias' high scores  
23 are attained through their endeavours to provide neutral summaries which meet the majority  
24 of the EQIP criterion.[46] Nonetheless, while overall EQIP scores do not differ substantially  
25 from existing literature, it is important to recognise that the quality of information is significantly  
26 influenced by the rapid turnover of information, a phenomenon not present in previous studies.  
27  
28  
29  
30  
31  
32  
33  
34  
35  
36  
37  
38  
39  
40  
41  
42  
43  
44  
45  
46  
47  
48  
49  
50  
51  
52  
53  
54  
55  
56 JAMA benchmark scores, unlike EQIP and DISCERN, were more consistent as only four  
57 points are available. Hence, high-scoring websites often fulfilled all four JAMA criteria whereas  
58 the majority of other entries scored two or three. Low-scoring websites scored significantly  
59  
60

1  
2  
3 lower ( $P<0.001$ ) in Authorship and Attribution, with only 44.13% and 17.81% fulfilling the  
4 criteria, reflecting congruence with the findings from EQIP regarding bibliography inclusion.  
5 Contrarily, website ownership and funding assessment, under Disclosure (86.23%), and  
6 assessments of publishing and updating dates, under Currency (81.78%), varied to a lesser  
7 degree, albeit still scoring significantly lower ( $P<0.001$ ). Comparative to the related EQIP  
8 sections, Disclosure and Currency likely scored better by assessing attributes independent to  
9 the content itself. Professional societies ( $n=4$ ; 3.50), closely followed by encyclopaedias ( $n=5$ ;  
10 3.40), scored the highest overall, whereas the mean JAMA scores were only 2.69 and four  
11 websites scoring zero. This is likely attributable to the lack of additional assessment criteria  
12 by the JAMA benchmark as it was developed during the infancy of web-based resources.  
13 Regardless, the tool is still effective at identifying high-quality content as high-scoring websites  
14 scored significantly better across each item ( $P<0.001$ ).

15  
16  
17  
18  
19  
20  
21  
22  
23  
24  
25  
26  
27  
28  
29  
30  
31  
32  
33  
34  
35  
36  
37  
38  
39  
40  
41  
42  
43  
44  
45  
46  
47  
48  
49  
50  
51  
52  
53  
54  
55  
56  
57  
58  
59  
60  
DISCERN's mean score of 38.0 across 16 items averaged 2.38 out of five per item. The  
DISCERN handbook details a rating of one when the information does not provide the  
appropriate information, three where it addresses it partially and five for a complete and  
adequate inclusion. Based on these guidelines, the majority of websites meet the listed criteria  
to a minimal extent. Similar to EQIP, DISCERN scores vary significantly, ranging from 19 to  
75, with the majority distributed between 25 to 47. Of the 16 items, 12 presented statistically  
significant differences between high- and low-scoring websites. Interestingly, the Reliability  
section provided the greatest difference in scoring, seen between item 4, clear display of  
information sources (mean 4.16 vs 2.55;  $P=0.019$ ), and item 5, a clear indication of where  
sources were used (mean 3.54 vs 2.28;  $P=0.007$ ). This corroborates with results from EQIP  
and JAMA assessments in highlighting the inadequacies of informative material production.

Quality of treatment information section scores varied less, albeit all with statistically significant  
differences. The greatest differences were in item 9, describing how each treatment works  
(1.76 vs 1.43;  $P=0.005$ ) and item 10, detailing treatment benefits (1.78 vs 1.43;  $P<0.001$ ).



1  
2  
3 Despite accommodating the treatment uncertainty during the assessment, almost all items  
4 evaluating treatment scored poorly, including high-scoring websites, and may be reflective of  
5 its lower journalistic priority or demand as the majority of websites were tailored towards  
6 discussing prevention. As a whole, DISCERN scores specifically addressing treatment options  
7 were poor, scoring 45.07 (SD 11.68) for websites that only discuss treatment as well as 42.84  
8 (SD 10.93) for websites that discuss both prevention and treatment. These scores are also  
9 lower than those of other DISCERN studies, which have mean scores between 45.8 and 56.1,  
10 with SD between 8.76 and 13.6.[47–49] While the majority of DISCERN scores were low,  
11 websites scored similarly in the Reliability section. The mean scores for items 1, 2 and 3 were  
12 the highest of all indicators, averaging 4.37, 4.29 and 4.33, whereas the items in treatment  
13 section scored between 1 and 2, with a maximum mean score of 1.66 in Item 14. The treatment  
14 section of DISCERN shows much more variation, with prevention alone (8.60; n=202) scoring  
15 lowest, treatment alone (18.09; n=46) scoring highest and websites discussing both (13.47;  
16 n=73) in between. This suggests that many websites do not include treatment information and,  
17 of those that do, websites tend to avoid discussion rather than provide the limited information  
18 available.

19  
20  
21  
22  
23  
24  
25  
26  
27  
28  
29  
30  
31  
32  
33  
34  
35  
36  
37  
38  
39 In short, all three tools utilised are validated based on international recommendations and  
40 provides a comprehensive assessment of online information: EQIP delivers an all-rounded  
41 evaluation of health information, DISCERN excels at scrutinising treatment and JAMA  
42 benchmark assesses all of a website's content as a whole. Additionally, as design alone is  
43 known to improve the perception of information credibility[50], the higher emphasis on quality  
44 of content in EQIP and DISCERN will likely prevent well-presented and user-friendly websites  
45 with poor content from attaining high scores over poorly-presented websites with good  
46 content. Altogether the tools suggest that the majority of COVID-19 websites are generally of  
47 poor quality and that quality fluctuates highly. This may subsequently impair the ability of the  
48 public to filter out websites of low validity and reliability and, hence, increase their risk of unsafe  
49 health behaviours during the pandemic. Through the use of these tools, the same standards  
50  
51  
52  
53  
54  
55  
56  
57  
58  
59  
60



1  
2  
3 can be held across different sources of information to produce higher quality educational  
4 material to improve both education and awareness.  
5  
6  
7  
8

### 9 **Reasons for poor quality information**

10  
11 Most sources scored poorly due to several possible reasons. Firstly, as COVID-19 was only  
12 identified in early December 2019[51], and recognised as a pandemic in March 2020[52], the  
13 general lack of information to produce patient information prevents accurate and reliable  
14 conclusions to be drawn. While research efforts have since gained traction, production of  
15 research, reviewing and publication is a lengthy process comparative to the rapid spread of  
16 COVID-19. Journals have since implemented fast-tracking of COVID-19 research.[53–55]  
17  
18 Similarly, Governments and Health Departments have also cooperated to support and fast-  
19 track COVID-19 studies.[56] The combined efforts have facilitated the publication of over  
20 5,000 COVID-19 articles in the WHO database alone.[57] It is also important to note the role  
21 of preprint servers during the pandemic as they are accessible to the public. While improving  
22 accessibility helps facilitate peer-reviewing; non-peer-reviewed articles can potentially be  
23 used, or cherry-picked, by non-professionals which can adversely affect public  
24 understanding.[58–61]  
25  
26  
27  
28  
29  
30  
31  
32  
33  
34  
35  
36  
37  
38  
39  
40

41 Health literacy also plays a crucial role in how COVID-19 information influences health  
42 behaviour. The associations between health literacy and health behaviour are well  
43 documented: low literacy is common among older adults engaging in poor health behaviour  
44 (P<0.005) ranging from lifestyles, such as physical activity, dietary habits and obesity, to social  
45 factors, such as loneliness and social isolation.[62–64] The effects of primary preventative  
46 measures, such as social distancing, self-isolation and other hygiene recommendations, may  
47 become impaired by the abundance of poorly written and incorrect information online. In  
48 particular, the elderly, most vulnerable population, suffer from even higher risks due to their  
49 lower health literacy.[65] Although health literacy, and by extension, health behaviours, can  
50 be improved through education[66], effective dissemination of credible information is critical  
51  
52  
53  
54  
55  
56  
57  
58  
59  
60

1  
2  
3 during the pandemic. The public, and journalists, need to exercise caution when accessing  
4 research and pre-prints during this period as inadequate health literacy may lead to  
5 counterproductive effects. Similarly, mass production of online information greatly increases  
6 the difficulty in distinguishing reliable information from the sea of misinformation, and hence,  
7 a greater emphasis must be placed on authors and journalists to deliver unbiased, credible  
8 and accurate information to the public.[67,68]  
9  
10  
11  
12  
13  
14  
15  
16  
17

18 Upon publication, articles are reviewed and summarised by journalists who bridge the  
19 knowledge gap between scientists and the wider public. This allows efficient dissemination of  
20 critical research to those who lack the scientific background to critically appraise and evaluate  
21 research. Notably, while 52% (n=169) of websites were 'News Services', only 12 (7.1%) were  
22 considered high-scoring, reflecting that very few provide a comprehensive account of COVID-  
23 19 information, possibly explained by the difficulty in matching the pace of COVID-19 research  
24 and technical inadequacies in delivering accurate and concise scientific information. As health  
25 information-seeking behaviour of the public will likely be based on news services[69], the  
26 highly variable and generally poor content is problematic.  
27  
28  
29  
30  
31  
32  
33  
34  
35  
36  
37  
38

39 Previous studies have identified that many health journalists lack the training required to  
40 accurately disseminate health news, leading to potentially harmful health effects.[70,71] The  
41 low scores across all tools indicate overall inadequacy of both reliability and accuracy. A  
42 survey of medical journalists across 37 countries highlighted the 3 most common barriers  
43 against quality content: lack of time, space and knowledge.[72] While journalism stresses the  
44 ability to summarise content quickly and concisely, experienced journalists often report the  
45 lack of knowledge as a barrier. The lack of expert knowledge in a rapidly progressing scientific  
46 field can impact the quality of conveyed information significantly. Furthermore, journalists  
47 reported difficulty in finding experts to explain the jargon, further impacting quality. This  
48 presents a large barrier towards disseminating quality COVID-19 information as the redirected  
49 efforts of many countries and institutions' scientists into research reduces availability to assist  
50  
51  
52  
53  
54  
55  
56  
57  
58  
59  
60

1  
2  
3 with medical journalism.[73,74] Expertise in a relevant academic background likely helps  
4 improve the content, as indicated by the highest-scoring entry, whose author holds a PhD in  
5 molecular genetics which scored 22 in EQIP, 4 in JAMA and 74 in DISCERN.[75] In short, our  
6 findings highlight the importance of addressing health outcomes through health literacy of both  
7 the public and authors.  
8  
9  
10  
11  
12

13  
14  
15 Our analysis identified the majority of websites as sources from Governments or health  
16 departments across various states of the USA, many of which have based information and  
17 advice from the Centers for Disease Control and Prevention (CDC). As both the nature and  
18 purpose of these sources vary, the visiting population and demographics would also vary due  
19 to differences in information-seeking behaviours. A recent study has identified a deficit of  
20 awareness and trust in information originating from the Government such as those of the CDC,  
21 revealing that while up to 83.6% of American adults are aware of the CDC, only 64.6% trust  
22 this source.[76] American adolescents were, however, less aware of the CDC (55.8%), but  
23 were more trusting of their information (72.2%). As previously established, trust in a  
24 Government is predictive of health outcomes as it affects behaviours such as service usage  
25 and vaccination rates.[77–79] Similarly, as access and usage of online health information vary  
26 between different demographics, it is paramount that we create and provide targeted and  
27 effective educational material for public use.[80,81]  
28  
29  
30  
31  
32  
33  
34  
35  
36  
37  
38  
39  
40  
41  
42  
43  
44

45 A comparison between the global Government/Health Department and News Services  
46 websites revealed significant differences between EQIP Content, Total EQIP, Total and  
47 DISCERN Treatment. The EQIP Content scores reflect differences in where information is  
48 obtained, with Government/Health Departments using primary research whereas journalists  
49 tend to utilise secondary research. However, News Services scored higher in DISCERN  
50 Treatment, potentially due to the Government's reluctance to prematurely disclose treatment  
51 information at early stages of discovery, whereas journalists may freely report results of all  
52 potential studies. Interestingly, the majority of USA Government websites had some form of  
53  
54  
55  
56  
57  
58  
59  
60

1  
2  
3 copy-pasted information from the Centre for Disease Control and Prevention (CDC), likely with  
4 the aim of maintaining consistency and centralisation information sources. In contrast, the  
5 majority of other sources rewrite information based on a variety of sources. American sources  
6 display a similar pattern of variation but the EQIP Identification scores of Government/Health  
7 Departments show statistically significant differences and scores lower than News Services  
8 (mean 3.34 vs 3.78;  $P=0.011$ ). The verbatim use of CDC information on these Government  
9 websites may have neglected the importance of clarity, transparency and critical appraisal of  
10 literature and focused on disseminating information instead.  
11  
12  
13  
14  
15  
16  
17  
18  
19  
20  
21

### 22 **Is the current information online adequate?**

23  
24 Google Trends identified the search popularity of treatment to have increased rapidly,  
25 outgrowing prevention searches since early-March. This suggests that initial demands for  
26 preventative information have been sufficiently met and interests now shift towards treatment.  
27  
28 The 275 websites addressing prevention scored below the mean EQIP (17.12 vs 17.78;  
29  $P<0.001$ ), JAMA (2.53 vs 2.69;  $P=0.001$ ) and DISCERN scores (34.64 vs 38.00;  $P<0.001$ ),  
30 showing that quality of preventative information remains subpar across all indicators. Similarly,  
31 treatment websites demonstrated their efficacy in sourcing, over discussing information, as  
32 they excelled in Identification (3.87 vs 3.50;  $P<0.001$ ) but scored poorly and below the mean  
33 in EQIP (16.89 vs 17.78;  $P<0.001$ ). This is also reflected by its above-average JAMA (3.13 vs  
34 2.69;  $P=0.001$ ) and DISCERN (45.07 vs 38.00;  $P<0.001$ ) scores. Contrarily, the 73 websites  
35 that discussed both prevention and treatment of COVID-19 consistently scored higher than  
36 the mean across all indicators: EQIP (20.15 vs 17.78;  $P<0.001$ ), JAMA (2.85 vs 2.69;  $P=0.001$ )  
37 and DISCERN (42.84 vs 38.00;  $P<0.001$ ). These websites explored multiple aspects of the  
38 virus, and likely utilises a variety of sources, thus producing higher quality articles through a  
39 better understanding of the topic. To combat increasingly dangerous COVID-19 myths, such  
40 as injection of disinfectants as treatment, continued maintenance and improvement to online  
41 available resources is paramount.[82,83]  
42  
43  
44  
45  
46  
47  
48  
49  
50  
51  
52  
53  
54  
55  
56  
57  
58  
59  
60

## Limitations

Although our utilised search engine, 'Google', is the most commonly used, it is not wholly representative as searches are often affected by the location of the requesting server and previous Internet usage. While querying from every country is not practical, the server used in the study was not used to conduct any other COVID-19-related searches, thus impact should be minimised. A further search was conducted on 10<sup>th</sup> July 2020 on the top 10 scoring EQIP and DISCERN websites through VPN servers in Texas, London, Toronto and Sydney. Only three of the websites were found within the first 10 pages of results using the same search-terms on the original server, with London and Sydney each returning two of the results, Toronto returning none (**Supplementary Table 4**) and a remaining URL redirecting to another page. The search also confirms differences in results between the location of the search, however, all three results from the Texas server were covered by London and Sydney. As websites can be updated or removed any time, our results are representative only at the time of the search, demonstrated by the distinct lack of the original websites in our second search in July. Similarly, search-terms obtained using 'Google Adwords Keyword Planner' and 'Google Trends', may not truly be indicative of search patterns of the wider public. Hence, 12 different variations of 'COVID-19' names and phrases potentially used by patients were utilised as search-terms. While social media is increasingly used to share health information, our study focused on search engines because previous studies have identified a lack of trust in social media information and which acts as a barrier against public engagement.[84] Similarly, while video-based information constitutes a valuable source of information, no tools have been validated in assessing video-based information, particularly for COVID-19, to the best of our knowledge. Forced inclusion of video content would likely yield inaccurately low scores across current tools as videos typically do not include as much written information. Another limitation is the exclusion of non-English language websites, especially reducing the representation of publicly available information given the international nature of the pandemic. A minority of URLs, particularly of News Services, regularly update their content or redirect visitors, potentially affecting the second round of evaluation and subsequent statistical analysis.

1  
2  
3 Additionally, modified EQIP tool, JAMA benchmark and DISCERN tool were limited as they  
4 were not designed to specifically assess the highly variable information produced during  
5 pandemics. However, the EQIP tool was designed to assess any type of patient information  
6 and demonstrated high inter-rater reliability.[17] Similarly, JAMA benchmark was designed to  
7 evaluate website reliability alone and DISCERN examines both reliability and content  
8 accuracy, thus, the combinational use of tools enhances the accuracy and objective  
9 assessment of these websites.  
10  
11  
12  
13  
14  
15  
16  
17  
18  
19

## 20 **Conclusion**

21  
22 In short, the abundance of Internet resources providing COVID-19 information is exemplified  
23 by the numerous identified websites during our search. The information available to the public  
24 may affect their health decisions, which, subsequently, affects the efficacy and outcome of  
25 public health measures implemented by health departments. As effective treatments and  
26 vaccine research is underway, COVID-19 is primarily addressed with preventative measures,  
27 hence necessitating a critical review of the quality and nature of the information accessible to  
28 the public. Our results demonstrated that the websites were chiefly produced by News  
29 Services and Government/Health Departments but were nonetheless of low quality. While the  
30 majority of websites addressed prevention, and likely met the information needs of the public  
31 as reflected by search trends, there is a relative deficit in websites that discuss treatment  
32 methods. A minority of websites discussed both prevention methods and treatment and were  
33 generally good resources but the majority of websites were also of inadequate quality. Thus,  
34 there is a need for higher quality online COVID-19 resources to facilitate public education and  
35 enable better cooperation and outcomes of public health measures.  
36  
37  
38  
39  
40  
41  
42  
43  
44  
45  
46  
47  
48  
49  
50  
51  
52  
53  
54  
55  
56  
57  
58  
59  
60

### Contributorship statement

Study conception and design: DAR, NM, SAG, KSF

Acquisition of data: SAG, KSF, LL, KHF, DR, AS

Analysis and interpretation of data: KSF, SAG, NM, DAR

Drafting of manuscript: KSF, SAG, NM, KHF

Critical revision: KSF, SAG, NM, DAR

### Competing interests

Authors have declared that no competing interests exist.

### Funding

Authors received no specific funding for this work.

### Data sharing statement

All relevant data are within this manuscript and supplementary files.

### Figures and Supplementary Figures

**Figure 1.** Popular search terms used in COVID-19 and their relative popularity throughout the pandemic provided by Google Trends

**Figure 2.** Workflow of webscraping and exclusion: initial 1275 websites returned were filtered for duplicates and assessed for eligibility to include 321 websites in the final dataset

**Figure 3.** Country of origin of websites in descending order of the number of websites contributed

**Figure 4.** Scores by top contributing countries (USA, UK, Canada and Australia) for EQIP tool, JAMA benchmark and DISCERN tool

**Figure 5.** High-score distribution of the final dataset compared against low-scoring websites for EQIP tool, JAMA benchmark and DISCERN tool

1  
2  
3 **Supplementary Figure 1.** Intraclass correlation plot demonstrating correlation between EQIP  
4 tool, JAMA benchmark and DISCERN tool  
5

6  
7 **Supplementary Figure 2.** Kruskal-Wallis box-plot of score distributions of JAMA benchmark  
8 against EQIP tool and DISCERN tool  
9

10  
11 **Supplementary Figure 3.** Bland-Altman Plot demonstrating assessor variations within each  
12 of the three tools and against other assessors  
13  
14  
15  
16  
17  
18  
19  
20  
21  
22  
23  
24  
25  
26  
27  
28  
29  
30  
31  
32  
33  
34  
35  
36  
37  
38  
39  
40  
41  
42  
43  
44  
45  
46  
47  
48  
49  
50  
51  
52  
53  
54  
55  
56  
57  
58  
59  
60

For peer review only





- 1  
2  
3 undergoing surgery with perioperative SARS-CoV-2 infection: an international cohort  
4 study. *Lancet* 2020;**396**:27–38. doi:10.1016/S0140-6736(20)31182-X  
5  
6  
7  
8 11 World Health Organization. COVID-19 Strategy Update. 2020.  
9  
10 [https://www.who.int/docs/default-source/coronaviruse/covid-strategy-update-](https://www.who.int/docs/default-source/coronaviruse/covid-strategy-update-14april2020.pdf?sfvrsn=29da3ba0_19)  
11 [14april2020.pdf?sfvrsn=29da3ba0\\_19](https://www.who.int/docs/default-source/coronaviruse/covid-strategy-update-14april2020.pdf?sfvrsn=29da3ba0_19) (accessed 30 Apr 2020).  
12  
13  
14 12 Feldmann H. Ebola — A Growing Threat? *N Engl J Med* 2014;**371**:1375–8.  
15  
16 doi:10.1056/NEJMp1405314  
17  
18 13 Odlum M, Yoon S. Health Information Needs and Health Seeking Behavior During the  
19  
20 2014-2016 Ebola Outbreak: A Twitter Content Analysis. *PLoS Curr* 2018;**10**.  
21  
22 doi:10.1371/currents.outbreaks.fa814fb2bec36e29b718ab6af66124fa  
23  
24  
25 14 Gilbert D. Which countries are under lockdown - and is it working?  
26  
27 2020.[https://www.telegraph.co.uk/news/2020/04/16/countries-in-lockdown-denmark-](https://www.telegraph.co.uk/news/2020/04/16/countries-in-lockdown-denmark-germany/)  
28 [germany/](https://www.telegraph.co.uk/news/2020/04/16/countries-in-lockdown-denmark-germany/) (accessed 30 Apr 2020).  
29  
30  
31 15 British Broadcasting Company. Coronavirus lockdown protest: What's behind the US  
32  
33 demonstrations? - BBC News. 2020.[https://www.bbc.co.uk/news/world-us-canada-](https://www.bbc.co.uk/news/world-us-canada-52359100)  
34 [52359100](https://www.bbc.co.uk/news/world-us-canada-52359100) (accessed 30 Apr 2020).  
35  
36  
37 16 Elwyn G, O'Connor A, Stacey D, *et al*. Developing a quality criteria framework for  
38  
39 patient decision aids: online international Delphi consensus process. *Bmj-British Med*  
40 *J* 2006;**333**:417–9. doi:10.1136/bmj.38926.629329.AE  
41  
42  
43 17 Zuk G, Palma AF, Eylert G, *et al*. Systematic Review of Quality of Patient Information  
44  
45 on Liposuction in the Internet. *Plast Reconstr Surgery-Global Open* 2016;**4**.  
46  
47 doi:10.1097/gox.0000000000000798  
48  
49  
50 18 Raptis DA, Sinanyan M, Ghani S, *et al*. Quality assessment of patient information on  
51  
52 the management of gallstone disease in the internet – A systematic analysis using the  
53  
54 modified ensuring quality information for patients tool. *HPB* 2019;**21**:1632–40.  
55  
56 doi:10.1016/j.hpb.2019.03.355  
57  
58 19 McCool ME, Wahl J, Schlecht I, *et al*. Evaluating written patient information for  
59  
60 eczema in German: Comparing the reliability of two instruments, DISCERN and EQIP.

- 1  
2  
3 *PLoS One* 2015;**10**. doi:10.1371/journal.pone.0139895  
4  
5 20 Vetter D, Ruhwinkel H, Raptis DA, *et al*. Quality Assessment of Information on  
6  
7 Bariatric Surgery Websites. *Obes Surg* 2018;:1–8.  
8  
9 21 Zuk G, Reinisch KB, Raptis DA, *et al*. Dupuytren Disease: Is There Enough  
10  
11 Comprehensive Patient Information on the Internet? *Interact J Med Res* 2017;**6**:e7.  
12  
13 doi:10.2196/ijmr.7822  
14  
15 22 Frueh FS, Palma AF, Raptis DA, *et al*. Carpal tunnel syndrome: Analysis of online  
16  
17 patient information with the EQIP tool. *Chir Main* 2015;**34**:113–21.  
18  
19 doi:10.1016/j.main.2015.04.003  
20  
21 23 Palma AF, Zuk G, Raptis DA, *et al*. Quality of information for women seeking breast  
22  
23 augmentation in the Internet. *J Plast Surg Hand Surg* 2016;**50**:262–71.  
24  
25 doi:10.3109/2000656X.2016.1154469  
26  
27 24 Melloul E, Raptis DA, Oberkofler CE, *et al*. Donor information for living donor liver  
28  
29 transplantation: Where can comprehensive information be found? *Liver Transplant*  
30  
31 2012;**18**:892–900. doi:10.1002/lt.23442  
32  
33 25 Minervation. The LIDA Instrument Minervation validation instrument for health care  
34  
35 web sites Full Version (1.2) containing instructions. 2007.  
36  
37 www.minervation.com/validation (accessed 30 Apr 2020).  
38  
39 26 Coughler C, M Burke S, Cardy JO. Analysis of the quality of online resources for  
40  
41 parents of children who are late to talk. *Autism Dev Lang Impair*  
42  
43 2020;**5**:239694152091794. doi:10.1177/2396941520917940  
44  
45 27 Kher A, Johnson S, Griffith R. Readability assessment of online patient education  
46  
47 material on congestive heart failure. *Adv Prev Med* 2017;**2017**.  
48  
49 28 Corcelles R, Daigle CR, Talamas HR, *et al*. Assessment of the quality of Internet  
50  
51 information on sleeve gastrectomy. *Surg Obes Relat Dis* 2015;**11**:539–44.  
52  
53 doi:10.1016/j.soard.2014.08.014  
54  
55 29 Sobota A, Ozakinci G. The quality and readability of online consumer information  
56  
57 about gynecologic cancer. *Int J Gynecol Cancer* 2015;**25**:537–41.  
58  
59  
60

- 1  
2  
3 doi:10.1097/IGC.0000000000000362  
4  
5 30 The eBusiness. Top 15 Best Search Engines | February 2020.  
6  
7 <http://www.ebizmba.com/articles/search-engines> (accessed 30 Apr 2020).  
8  
9 31 Search Engine Watch. Google Hits the Billion Monthly Unique Visitors Mark.  
10  
11 2011;**2020**.[https://www.searchenginewatch.com/2011/06/23/google-hits-the-billion-](https://www.searchenginewatch.com/2011/06/23/google-hits-the-billion-monthly-unique-visitors-mark/)  
12  
13 [monthly-unique-visitors-mark/](https://www.searchenginewatch.com/2011/06/23/google-hits-the-billion-monthly-unique-visitors-mark/)  
14  
15 32 Google. <https://www.google.com/> (accessed 30 Apr 2020).  
16  
17 33 Google. Google Ads - Get More Customers With Easy Online Advertising.  
18  
19 [https://ads.google.com/intl/en\\_GB/home/](https://ads.google.com/intl/en_GB/home/) (accessed 30 Apr 2020).  
20  
21 34 Google. Google Trends. <https://trends.google.com/trends>  
22  
23 35 Moul B, Franck LS, Brady H. Ensuring quality information for patients: development  
24  
25 and preliminary validation of a new instrument to improve the quality of written health  
26  
27 care information. *Health Expect* 2004;**7**:165–75. doi:10.1111/j.1369-  
28  
29 7625.2004.00273.x  
30  
31 36 Charvet-Berard AI, Chopard P, Perneger T V. Measuring quality of patient information  
32  
33 documents with an expanded EQIP scale. *Patient Educ Couns* 2008;**70**:407–11.  
34  
35 doi:10.1016/j.pec.2007.11.018  
36  
37 37 British Medical Association. BMA Patient Information Awards, .  
38  
39 2018;**2018**.<https://www.bma.org.uk/library/patient-information-awards>  
40  
41 38 International Patient Decision Aid Standards Collaboration. IPDAS Collaboration  
42  
43 Background Document. 2005;**2018**.[http://ipdas.ohri.ca/IPDAS\\_Background.pdf](http://ipdas.ohri.ca/IPDAS_Background.pdf)  
44  
45 39 Silberg WM, Lundberg GD, Musacchio RA. Assessing, controlling, and assuring the  
46  
47 quality of medical information on the Internet: Caveant lector et viewer—Let the  
48  
49 reader and viewer beware. *JAMA* 1997;**277**:1244–5.  
50  
51 40 Janssen S, Fahlbusch FB, Kaesmann L, *et al*. Radiotherapy for prostate cancer:  
52  
53 DISCERN quality assessment of patient-oriented websites in 2018. *Bmc Urol*  
54  
55 2019;**19**. doi:10.1186/s12894-019-0474-4  
56  
57 41 Borgmann H, Wölm J-H, Vallo S, *et al*. Prostate Cancer on the Web—Expedient Tool  
58  
59  
60

- 1  
2  
3 for Patients' Decision-Making? *J Cancer Educ* 2017;**32**:135–40.  
4  
5  
6 42 Charnock D, Shepperd S, Needham G, *et al*. DISCERN: an instrument for judging the  
7 quality of written consumer health information on treatment choices. 1998.  
8  
9  
10 43 Nghiem AZ, Mahmoud Y, Som R. Evaluating the quality of internet information for  
11 breast cancer. *Breast* 2016;**25**:34–7. doi:10.1016/j.breast.2015.10.001  
12  
13  
14 44 Raptis DA. rBiostatistics.com (alpha version) | rBiostatistics.com.  
15  
16 <https://www.rbiostatistics.com/> (accessed 30 Apr 2020).  
17  
18 45 Karamitros GA, Kitsos NA. Clefts of the lip and palate: is the Internet a trustworthy  
19 source of information for patients? *Int J Oral Maxillofac Surg* 2018;**47**:1114–20.  
20  
21  
22 doi:10.1016/j.ijom.2018.03.003  
23  
24 46 Sanger L. Wikipedia Policy.  
25  
26 2001.[http://en.wikipedia.org/w/index.php?title=Wikipedia\\_policy&direction=next&oldid](http://en.wikipedia.org/w/index.php?title=Wikipedia_policy&direction=next&oldid=68263)  
27  
28 [=68263](http://en.wikipedia.org/w/index.php?title=Wikipedia_policy&direction=next&oldid=68263) (accessed 10 Jul 2020).  
29  
30  
31 47 Som R, Gunawardana NP. Internet chemotherapy information is of good quality:  
32 Assessment with the DISCERN tool. *Br J Cancer* 2012;**107**:403.  
33  
34  
35 doi:10.1038/bjc.2012.223  
36  
37 48 Kaicker J, Debono VB, Dang W, *et al*. Assessment of the quality and variability of  
38 health information on chronic pain websites using the DISCERN instrument. *BMC*  
39  
40  
41 *Med* 2010;**8**:59. doi:10.1186/1741-7015-8-59  
42  
43  
44 49 Jaffe J, Tonick S, Angell N. Quality of Web-Based Information on Epidural  
45 Anesthesia. *Obstet Gynecol* 2014;**123**:115S.  
46  
47  
48 doi:10.1097/01.aog.0000447063.32706.46  
49  
50  
51 50 Sbaffi L, Rowley J. Trust and Credibility in Web-Based Health Information: A Review  
52 and Agenda for Future Research. *J Med Internet Res* 2017;**19**. doi:10.2196/jmir.7579  
53  
54  
55 51 World Health Organization. WHO | Novel Coronavirus – China.  
56 2020.<https://www.who.int/csr/don/12-january-2020-novel-coronavirus-china/en/>  
57  
58 (accessed 30 Apr 2020).  
59  
60  
52 World Health Organization. Statement on the second meeting of the International

- 1  
2  
3 Health Regulations (2005) Emergency Committee regarding the outbreak of novel  
4 coronavirus (2019-nCoV). 2020.[https://www.who.int/news-room/detail/30-01-2020-](https://www.who.int/news-room/detail/30-01-2020-statement-on-the-second-meeting-of-the-international-health-regulations-(2005)-emergency-committee-regarding-the-outbreak-of-novel-coronavirus-(2019-ncov))  
5  
6  
7  
8  
9  
10  
11  
12 statement-on-the-second-meeting-of-the-international-health-regulations-(2005)-  
13  
14 emergency-committee-regarding-the-outbreak-of-novel-coronavirus-(2019-ncov)  
15 (accessed 30 Apr 2020).
- 16 53 COVID-19 Updates. <https://plos.org/covid-19/> (accessed 30 Apr 2020).
- 17 54 Elsevier. COVID-19 Update - Elsevier. [https://www.journals.elsevier.com/journal-of-](https://www.journals.elsevier.com/journal-of-critical-care/covid-19)  
18  
19  
20  
21  
22  
23  
24  
25  
26  
27  
28  
29  
30  
31  
32  
33  
34  
35  
36  
37  
38  
39  
40  
41  
42  
43  
44  
45  
46  
47  
48  
49  
50  
51  
52  
53  
54  
55  
56  
57  
58  
59  
60  
61  
62  
63  
64  
65  
66  
67  
68  
69  
70  
71  
72  
73  
74  
75  
76  
77  
78  
79  
80  
81  
82  
83  
84  
85  
86  
87  
88  
89  
90  
91  
92  
93  
94  
95  
96  
97  
98  
99  
100  
101  
102  
103  
104  
105  
106  
107  
108  
109  
110  
111  
112  
113  
114  
115  
116  
117  
118  
119  
120  
121  
122  
123  
124  
125  
126  
127  
128  
129  
130  
131  
132  
133  
134  
135  
136  
137  
138  
139  
140  
141  
142  
143  
144  
145  
146  
147  
148  
149  
150  
151  
152  
153  
154  
155  
156  
157  
158  
159  
160  
161  
162  
163  
164  
165  
166  
167  
168  
169  
170  
171  
172  
173  
174  
175  
176  
177  
178  
179  
180  
181  
182  
183  
184  
185  
186  
187  
188  
189  
190  
191  
192  
193  
194  
195  
196  
197  
198  
199  
200  
201  
202  
203  
204  
205  
206  
207  
208  
209  
210  
211  
212  
213  
214  
215  
216  
217  
218  
219  
220  
221  
222  
223  
224  
225  
226  
227  
228  
229  
230  
231  
232  
233  
234  
235  
236  
237  
238  
239  
240  
241  
242  
243  
244  
245  
246  
247  
248  
249  
250  
251  
252  
253  
254  
255  
256  
257  
258  
259  
260  
261  
262  
263  
264  
265  
266  
267  
268  
269  
270  
271  
272  
273  
274  
275  
276  
277  
278  
279  
280  
281  
282  
283  
284  
285  
286  
287  
288  
289  
290  
291  
292  
293  
294  
295  
296  
297  
298  
299  
300  
301  
302  
303  
304  
305  
306  
307  
308  
309  
310  
311  
312  
313  
314  
315  
316  
317  
318  
319  
320  
321  
322  
323  
324  
325  
326  
327  
328  
329  
330  
331  
332  
333  
334  
335  
336  
337  
338  
339  
340  
341  
342  
343  
344  
345  
346  
347  
348  
349  
350  
351  
352  
353  
354  
355  
356  
357  
358  
359  
360  
361  
362  
363  
364  
365  
366  
367  
368  
369  
370  
371  
372  
373  
374  
375  
376  
377  
378  
379  
380  
381  
382  
383  
384  
385  
386  
387  
388  
389  
390  
391  
392  
393  
394  
395  
396  
397  
398  
399  
400  
401  
402  
403  
404  
405  
406  
407  
408  
409  
410  
411  
412  
413  
414  
415  
416  
417  
418  
419  
420  
421  
422  
423  
424  
425  
426  
427  
428  
429  
430  
431  
432  
433  
434  
435  
436  
437  
438  
439  
440  
441  
442  
443  
444  
445  
446  
447  
448  
449  
450  
451  
452  
453  
454  
455  
456  
457  
458  
459  
460  
461  
462  
463  
464  
465  
466  
467  
468  
469  
470  
471  
472  
473  
474  
475  
476  
477  
478  
479  
480  
481  
482  
483  
484  
485  
486  
487  
488  
489  
490  
491  
492  
493  
494  
495  
496  
497  
498  
499  
500  
501  
502  
503  
504  
505  
506  
507  
508  
509  
510  
511  
512  
513  
514  
515  
516  
517  
518  
519  
520  
521  
522  
523  
524  
525  
526  
527  
528  
529  
530  
531  
532  
533  
534  
535  
536  
537  
538  
539  
540  
541  
542  
543  
544  
545  
546  
547  
548  
549  
550  
551  
552  
553  
554  
555  
556  
557  
558  
559  
560  
561  
562  
563  
564  
565  
566  
567  
568  
569  
570  
571  
572  
573  
574  
575  
576  
577  
578  
579  
580  
581  
582  
583  
584  
585  
586  
587  
588  
589  
590  
591  
592  
593  
594  
595  
596  
597  
598  
599  
600  
601  
602  
603  
604  
605  
606  
607  
608  
609  
610  
611  
612  
613  
614  
615  
616  
617  
618  
619  
620  
621  
622  
623  
624  
625  
626  
627  
628  
629  
630  
631  
632  
633  
634  
635  
636  
637  
638  
639  
640  
641  
642  
643  
644  
645  
646  
647  
648  
649  
650  
651  
652  
653  
654  
655  
656  
657  
658  
659  
660  
661  
662  
663  
664  
665  
666  
667  
668  
669  
670  
671  
672  
673  
674  
675  
676  
677  
678  
679  
680  
681  
682  
683  
684  
685  
686  
687  
688  
689  
690  
691  
692  
693  
694  
695  
696  
697  
698  
699  
700  
701  
702  
703  
704  
705  
706  
707  
708  
709  
710  
711  
712  
713  
714  
715  
716  
717  
718  
719  
720  
721  
722  
723  
724  
725  
726  
727  
728  
729  
730  
731  
732  
733  
734  
735  
736  
737  
738  
739  
740  
741  
742  
743  
744  
745  
746  
747  
748  
749  
750  
751  
752  
753  
754  
755  
756  
757  
758  
759  
760  
761  
762  
763  
764  
765  
766  
767  
768  
769  
770  
771  
772  
773  
774  
775  
776  
777  
778  
779  
780  
781  
782  
783  
784  
785  
786  
787  
788  
789  
790  
791  
792  
793  
794  
795  
796  
797  
798  
799  
800  
801  
802  
803  
804  
805  
806  
807  
808  
809  
810  
811  
812  
813  
814  
815  
816  
817  
818  
819  
820  
821  
822  
823  
824  
825  
826  
827  
828  
829  
830  
831  
832  
833  
834  
835  
836  
837  
838  
839  
840  
841  
842  
843  
844  
845  
846  
847  
848  
849  
850  
851  
852  
853  
854  
855  
856  
857  
858  
859  
860  
861  
862  
863  
864  
865  
866  
867  
868  
869  
870  
871  
872  
873  
874  
875  
876  
877  
878  
879  
880  
881  
882  
883  
884  
885  
886  
887  
888  
889  
890  
891  
892  
893  
894  
895  
896  
897  
898  
899  
900  
901  
902  
903  
904  
905  
906  
907  
908  
909  
910  
911  
912  
913  
914  
915  
916  
917  
918  
919  
920  
921  
922  
923  
924  
925  
926  
927  
928  
929  
930  
931  
932  
933  
934  
935  
936  
937  
938  
939  
940  
941  
942  
943  
944  
945  
946  
947  
948  
949  
950  
951  
952  
953  
954  
955  
956  
957  
958  
959  
960  
961  
962  
963  
964  
965  
966  
967  
968  
969  
970  
971  
972  
973  
974  
975  
976  
977  
978  
979  
980  
981  
982  
983  
984  
985  
986  
987  
988  
989  
990  
991  
992  
993  
994  
995  
996  
997  
998  
999  
1000
- Health Regulations (2005) Emergency Committee regarding the outbreak of novel coronavirus (2019-nCoV). 2020.[https://www.who.int/news-room/detail/30-01-2020-statement-on-the-second-meeting-of-the-international-health-regulations-\(2005\)-emergency-committee-regarding-the-outbreak-of-novel-coronavirus-\(2019-ncov\)](https://www.who.int/news-room/detail/30-01-2020-statement-on-the-second-meeting-of-the-international-health-regulations-(2005)-emergency-committee-regarding-the-outbreak-of-novel-coronavirus-(2019-ncov)) (accessed 30 Apr 2020).
- 53 COVID-19 Updates. <https://plos.org/covid-19/> (accessed 30 Apr 2020).
- 54 Elsevier. COVID-19 Update - Elsevier. <https://www.journals.elsevier.com/journal-of-critical-care/covid-19> (accessed 30 Apr 2020).
- 55 Anesthesia & Analgesia. Call for Papers: Coronavirus Disease 2019 (COVID-19). <https://journals.lww.com/anesthesia-analgesia/Pages/CFPCOVID19.aspx> (accessed 30 Apr 2020).
- 56 National Health Service Health Research Authority. COVID-19 research - Health Research Authority. <https://www.hra.nhs.uk/covid-19-research/> (accessed 30 Apr 2020).
- 57 World Health Organization. COVID-19: Global literature on coronavirus disease. <https://search.bvsalud.org/global-literature-on-novel-coronavirus-2019-ncov/> (accessed 30 Apr 2020).
- 58 Majumder MS, Mandl KD. Early in the epidemic: impact of preprints on global discourse about COVID-19 transmissibility. *Lancet Glob Heal* 2020.
- 59 Pradhan P, Pandey AK, Mishra A, *et al*. Uncanny similarity of unique inserts in the 2019-nCoV spike protein to HIV-1 gp120 and Gag. *BioRxiv* 2020.
- 60 Liu DWC. Science Denial and the Science Classroom. *Cbe-Life Sci Educ* 2012;**11**:129–34. doi:10.1187/cbe.12-03-0029
- 61 Altmetric – Uncanny similarity of unique inserts in the 2019-nCoV spike protein to HIV-1 gp120 and Gag. <https://www.altmetric.com/details/74957328> (accessed 30 Apr 2020).
- 62 Reisi M, Javadzade SH, Heydarabadi AB, *et al*. The relationship between functional health literacy and health promoting behaviors among older adults. *J Educ Health*

- 1  
2  
3 *Promot* 2014;**3**:119. doi:10.4103/2277-9531.145925  
4  
5 63 Geboers B, Reijneveld SA, Jansen CJM, *et al.* Health Literacy Is Associated With  
6 Health Behaviors and Social Factors Among Older Adults: Results from the LifeLines  
7 Cohort Study. *J Health Commun* 2016;**21**:45–53.  
8  
9 doi:10.1080/10810730.2016.1201174  
10  
11  
12  
13 64 Husson O, Mols F, Fransen MP, *et al.* Low subjective health literacy is associated  
14 with adverse health behaviors and worse health-related quality of life among  
15 colorectal cancer survivors: Results from the profiles registry. *Psychooncology*  
16 2015;**24**:478–86. doi:10.1002/pon.3678  
17  
18  
19  
20  
21  
22 65 Chesser AK, Keene Woods N, Smothers K, *et al.* Health Literacy and Older Adults.  
23 *Gerontol Geriatr Med* 2016;**2**:233372141663049. doi:10.1177/2333721416630492  
24  
25  
26 66 Bay JL, Vickers MH, Mora HA, *et al.* Adolescents as agents of healthful change  
27 through scientific literacy development: A school-university partnership program in  
28 New Zealand. *Int J STEM Educ* 2017;**4**. doi:10.1186/s40594-017-0077-0  
29  
30  
31  
32  
33 67 Barel-ben David Y, Garty ES, Baram-tsabari A. Can scientists fill the science  
34 journalism void ? Online public engagement with science stories authored by  
35 scientists. 2020;**1**–15.  
36  
37  
38  
39 68 Lazer BDMJ, Baum MA, Benkler Y, *et al.* The science of fake news. 2018.  
40  
41 69 Longo DR. Understanding health information, communication, and information  
42 seeking of patients and consumers: a comprehensive and integrated model. *Heal*  
43 *Expect* 2005;**8**:189–94.  
44  
45  
46  
47 70 Keshvari M, Yamani N, Adibi P, *et al.* Health journalism: Health reporting status and  
48 challenges. *Iran J Nurs Midwifery Res* 2018;**23**:14.  
49  
50  
51 71 Schwitzer G. How do US journalists cover treatments, tests, products, and  
52 procedures? An evaluation of 500 stories. *PLoS Med* 2008;**5**.  
53  
54  
55 72 Larsson A, Oxman AD, Carling C, *et al.* Medical messages in the media—barriers and  
56 solutions to improving medical journalism. *Heal Expect* 2003;**6**:323–31.  
57  
58  
59 73 Cattani M. Global coalition to accelerate COVID-19 clinical research in resource-



- 1  
2  
3 limited settings. *Lancet* 2020.  
4
- 5 74 ST. George's University of London. 3 April: 2020 Covid-19 response — our role in  
6 tackling the pandemic. <https://www.sgul.ac.uk/news/alerts/bulletins/3-april-2020>  
7 (accessed 30 Apr 2020).  
8  
9
- 10  
11 75 Saey Tina Hesman. Repurposed drugs may help scientists fight the new coronavirus.  
12 2020. doi:10.1101/2020.01.28.922922V2  
13  
14
- 15 76 Kowitt SD, Schmidt AM, Hannan A, *et al.* Awareness and trust of the FDA and CDC:  
16 Results from a national sample of US adults and adolescents. *PLoS One* 2017;**12**.  
17  
18
- 19 77 Bish A, Yardley L, Nicoll A, *et al.* Factors associated with uptake of vaccination  
20 against pandemic influenza: a systematic review. *Vaccine* 2011;**29**:6472–84.  
21  
22
- 23 78 Whetten K, Leserman J, Whetten R, *et al.* Exploring lack of trust in care providers and  
24 the government as a barrier to health service use. *Am J Public Health* 2006;**96**:716–  
25 21.  
26  
27
- 28 79 Quinn SC, Parmer J, Freimuth VS, *et al.* Exploring communication, trust in  
29 government, and vaccination intention later in the 2009 H1N1 pandemic: results of a  
30 national survey. *Biosecurity bioterrorism biodefense Strateg Pract Sci* 2013;**11**:96–  
31 106.  
32  
33
- 34 80 Sadah SA, Shahbazi M, Wiley MT, *et al.* Demographic-based content analysis of web-  
35 based health-related social media. *J Med Internet Res* 2016;**18**:e148.  
36  
37
- 38 81 Sadah SA, Shahbazi M, Wiley MT, *et al.* A study of the demographics of web-based  
39 health-related social media users. *J Med Internet Res* 2015;**17**:e194.  
40  
41
- 42 82 World Health Organization. Myth busters.  
43 [https://www.who.int/emergencies/diseases/novel-coronavirus-2019/advice-for-](https://www.who.int/emergencies/diseases/novel-coronavirus-2019/advice-for-public/myth-busters)  
44 public/myth-busters (accessed 30 Apr 2020).  
45  
46
- 47 83 Smith D. Coronavirus: medical experts denounce Trump's theory of 'disinfectant  
48 injection' | World news | The Guardian.  
49 2020.[https://www.theguardian.com/world/2020/apr/23/trump-coronavirus-treatment-](https://www.theguardian.com/world/2020/apr/23/trump-coronavirus-treatment-disinfectant)  
50 disinfectant (accessed 30 Apr 2020).  
51  
52  
53  
54  
55  
56  
57  
58  
59  
60



- 1  
2  
3 84 Zhao Y, Zhang J. Consumer health information seeking in social media: a literature  
4 review. *Health Info Libr J* 2017;**34**:268–83. doi:10.1111/hir.12192  
5  
6  
7  
8  
9  
10  
11  
12  
13  
14  
15  
16  
17  
18  
19  
20  
21  
22  
23  
24  
25  
26  
27  
28  
29  
30  
31  
32  
33  
34  
35  
36  
37  
38  
39  
40  
41  
42  
43  
44  
45  
46  
47  
48  
49  
50  
51  
52  
53  
54  
55  
56  
57  
58  
59  
60

For peer review only

**Table 1.** Website demographic and background information

| Type                         | Total (n,%)  | Treatment (n,%) | Prevention (n,%) | Prevention and Treatment (n,%) |
|------------------------------|--------------|-----------------|------------------|--------------------------------|
| Academic Centre              | 10 (3.12%)   | 1 (0.31%)       | 4 (1.25%)        | 5 (1.56%)                      |
| Charity/NGO                  | 12 (3.74%)   | 1 (0.31%)       | 9 (2.8%)         | 2 (0.62%)                      |
| Encyclopaedia                | 5 (1.56%)    | 0 (0%)          | 1 (0.31%)        | 4 (1.25%)                      |
| Government/Health Department | 87 (27.10%)  | 1 (0.31%)       | 65 (20.25%)      | 21 (6.54%)                     |
| Hospital                     | 7 (2.18%)    | 0 (0%)          | 5 (1.56%)        | 2 (0.62%)                      |
| Industry                     | 30 (9.35%)   | 8 (2.49%)       | 10 (3.12%)       | 12 (3.74%)                     |
| Military                     | 1 (0.31%)    | 0 (0%)          | 1 (0.31%)        | 0 (0%)                         |
| News Service                 | 163 (50.78%) | 34 (10.59%)     | 102 (31.78%)     | 27 (8.41%)                     |
| Patient group                | 1 (0.10%)    | 1 (0.31%)       | 0 (0%)           | 0 (0%)                         |
| Professional society         | 4 (1.25%)    | 0 (0%)          | 4 (1.25%)        | 0 (0%)                         |
| Research Centre              | 1 (0.31%)    | 0 (0%)          | 1 (0.31%)        | 0 (0%)                         |
| Total                        | 321          | 46 (14.33%)     | 202 (62.93%)     | 73 (22.74%)                    |

**Table 2.** Overall quality of information of all sources of information

| Indicator/<br>(Mean,<br>SD) | Academic<br>centre | Charity/N<br>GO | Encyclop<br>aedia | Governm<br>ent/Healt<br>h Departme<br>nt | Hospital | Industry | Military | News<br>Service | Patient<br>group | Professio<br>nal<br>society | Research<br>Centre | P Value |
|-----------------------------|--------------------|-----------------|-------------------|------------------------------------------|----------|----------|----------|-----------------|------------------|-----------------------------|--------------------|---------|
|-----------------------------|--------------------|-----------------|-------------------|------------------------------------------|----------|----------|----------|-----------------|------------------|-----------------------------|--------------------|---------|

|                     |                  |                 |                 |                 |                 |                  |           |                  |           |                |           |        |
|---------------------|------------------|-----------------|-----------------|-----------------|-----------------|------------------|-----------|------------------|-----------|----------------|-----------|--------|
| EQIP Content        | 7.70<br>(2.50)   | 6.75<br>(3.33)  | 10.80<br>(3.11) | 8.11<br>(2.49)  | 7.14<br>(2.19)  | 7.13<br>(2.60)   | 5.00 (0)  | 6.22<br>(2.11)   | 10.00 (0) | 5.50 (3)       | 5.00 (0)  | <0.001 |
| EQIP Identification | 2.90<br>(1.20)   | 3.08<br>(0.90)  | 4.80<br>(0.45)  | 3.44<br>(1.03)  | 2.71<br>(1.38)  | 3.4 (1.13)       | 1.00 (0)  | 3.62<br>(0.73)   | 3.00 (0)  | 4.00 (0)       | 4.00 (0)  | 0.003  |
| EQIP Structure      | 7.90<br>(1.85)   | 7.67<br>(1.30)  | 8.60<br>(1.67)  | 7.34<br>(1.45)  | 7.43<br>(0.98)  | 6.97<br>(1.83)   | 9.00 (0)  | 7.22<br>(1.39)   | 10.00 (0) | 7.25 (0.5)     | 5.00 (0)  | 0.08   |
| EQIP Total          | 18.50<br>(3.66)  | 17.50<br>(4.32) | 24.20<br>(3.56) | 18.9<br>(3.79)  | 17.29<br>(3.50) | 17.5<br>(4.48)   | 15.00 (0) | 17.06<br>(3.19)  | 23.00 (0) | 16.75<br>(3.4) | 14.00 (0) | <0.001 |
| JAMA Total          | 2.50<br>(0.97)   | 2.50<br>(1.00)  | 3.40<br>(0.55)  | 2.16<br>(0.86)  | 2.14<br>(1.57)  | 2.73<br>(1.23)   | 1.00 (0)  | 2.98<br>(0.85)   | 3.00 (0)  | 3.50<br>(0.58) | 3.00 (0)  | <0.001 |
| DISCERN Reliability | 27.20<br>(6.78)  | 26.25<br>(6.51) | 35.60<br>(4.77) | 27.47<br>(5.96) | 29.86<br>(5.58) | 26.6<br>(7.46)   | 23.00 (0) | 26.31<br>(6.3)   | 27.00 (0) | 29.50<br>(4.2) | 26.00 (0) | 0.128  |
| DISCERN Treatment   | 13.00<br>(6.70)  | 9.42<br>(2.39)  | 16.00<br>(9.30) | 9.02<br>(3.14)  | 8.71<br>(1.89)  | 13.33<br>(6.39)  | 8.00 (0)  | 11.72<br>(6.22)  | 13.00 (0) | 8.50 (1)       | 17.00 (0) | 0.001  |
| DISCERN Total       | 40.20<br>(10.38) | 35.67<br>(7.67) | 51.60<br>(12.3) | 36.49<br>(7.50) | 38.57<br>(5.47) | 39.93<br>(10.45) | 31.00 (0) | 38.04<br>(10.44) | 40.00 (0) | 38.00<br>(5.1) | 43.00 (0) | 0.167  |

**Table 3.** Overall quality of information of all websites subsets

| Indicator/(Mean, SD) | Overall | Treatment | Prevention | Prevention Treatment and | P Value |
|----------------------|---------|-----------|------------|--------------------------|---------|
|----------------------|---------|-----------|------------|--------------------------|---------|

|                     |              |               |              |               |        |
|---------------------|--------------|---------------|--------------|---------------|--------|
| EQIP Content        | 6.97 (2.52)  | 6.26 (1.81)   | 6.55 (2.30)  | 8.58 (2.84)   | <0.001 |
| EQIP Identification | 3.50 (0.93)  | 3.87 (0.72)   | 3.32 (0.97)  | 3.78 (0.80)   | <0.001 |
| EQIP Structure      | 7.30 (1.47)  | 6.76 (1.46)   | 7.25 (1.46)  | 7.79 (1.37)   | <0.001 |
| EQIP Total          | 17.78 (3.71) | 16.89 (2.84)  | 17.12 (3.45) | 20.15 (3.95)  | <0.001 |
| JAMA Total          | 2.69 (0.98)  | 3.13 (0.72)   | 2.53 (1.05)  | 2.85 (0.84)   | 0.001  |
| DISCERN Reliability | 26.93 (6.35) | 26.98 (6.92)  | 26.04 (5.72) | 29.37 (7.04)  | <0.001 |
| DISCERN Treatment   | 11.07 (5.60) | 18.09 (6.04)  | 8.60 (2.45)  | 13.47 (6.73)  | <0.001 |
| DISCERN Total       | 38.00 (9.61) | 45.07 (11.67) | 34.64 (6.52) | 42.84 (10.93) | <0.001 |

**Table 4.** Comparison between Government and News Services

| Indicator | Global (USA inclusive) (n=250) | USA (n=121) |
|-----------|--------------------------------|-------------|
|-----------|--------------------------------|-------------|

|                     | Government Mean Score | Government Mean Rank | News Mean Score | News Mean Rank | P Value | Government Mean Score | Government Mean Rank | News Mean Score | News Mean Rank | P Value |
|---------------------|-----------------------|----------------------|-----------------|----------------|---------|-----------------------|----------------------|-----------------|----------------|---------|
| EQIP Content        | 8.11                  | 161.34               | 6.22            | 106.37         | <0.001  | 7.66                  | 75.80                | 6.17            | 54.22          | 0.002   |
| EQIP Identification | 3.44                  | 118.28               | 3.62            | 129.35         | 0.207   | 3.34                  | 50.29                | 3.78            | 65.90          | 0.011   |
| EQIP Structure      | 7.34                  | 129.90               | 7.22            | 123.15         | 0.464   | 7.55                  | 67.54                | 7.08            | 58.01          | 0.148   |
| EQIP Total          | 18.90                 | 151.52               | 17.06           | 111.61         | <0.001  | 18.55                 | 71.21                | 17.04           | 56.33          | 0.029   |
| JAMA Total          | 2.16                  | 85.72                | 2.98            | 146.73         | <0.001  | 2.03                  | 34.28                | 3.17            | 73.23          | <0.001  |
| DISCERN Reliability | 27.47                 | 137.15               | 26.31           | 119.28         | 0.062   | 26.53                 | 60.26                | 26.66           | 61.34          | 0.876   |
| DISCERN Treatment   | 9.02                  | 110.95               | 11.72           | 133.27         | 0.001   | 8.84                  | 47.99                | 12.59           | 66.96          | 0.001   |

|               |       |        |       |        |       |       |       |       |       |       |
|---------------|-------|--------|-------|--------|-------|-------|-------|-------|-------|-------|
| DISCERN Total | 36.49 | 105.32 | 38.04 | 136.27 | 0.963 | 35.37 | 54.72 | 39.25 | 63.87 | 0.182 |
|---------------|-------|--------|-------|--------|-------|-------|-------|-------|-------|-------|

**Table 5.** Top 5 websites based on EQIP and DISCERN scores

| URL                                                                                                                                                                                                                               | Country                  | Treatment<br>Prevention | or | Total EQIP | Total JAMA | Total DISCERN |
|-----------------------------------------------------------------------------------------------------------------------------------------------------------------------------------------------------------------------------------|--------------------------|-------------------------|----|------------|------------|---------------|
| <b>Top Scoring EQIP Sites</b>                                                                                                                                                                                                     |                          |                         |    |            |            |               |
| <a href="https://www.gov.je/health/coronavirus/Pages/index.aspx">https://www.gov.je/health/coronavirus/Pages/index.aspx</a>                                                                                                       | Channel Islands (Jersey) | Both                    |    | 29         | 3          | 49            |
| <a href="https://en.wikipedia.org/wiki/2019%E2%80%932020_coronavirus_pandemic">https://en.wikipedia.org/wiki/2019%E2%80%932020_coronavirus_pandemic</a>                                                                           | USA                      | Both                    |    | 28         | 3          | 61            |
| <a href="https://www.health.nsw.gov.au/Infectious/alerts/Pages/coronavirus-faqs.aspx">https://www.health.nsw.gov.au/Infectious/alerts/Pages/coronavirus-faqs.aspx</a>                                                             | Australia                | Both                    |    | 28         | 3          | 46            |
| <a href="https://www.ageuk.org.uk/information-advice/coronavirus/coronavirus/#">https://www.ageuk.org.uk/information-advice/coronavirus/coronavirus/#</a>                                                                         | UK                       | Both                    |    | 27         | 3          | 48            |
| <a href="https://www.wikihow.com/Prevent-Coronavirus">https://www.wikihow.com/Prevent-Coronavirus</a>                                                                                                                             | USA                      | Prevention only         |    | 27         | 4          | 46            |
| <b>Top Scoring DISCERN Sites</b>                                                                                                                                                                                                  |                          |                         |    |            |            |               |
| <a href="https://www.sciencenews.org/article/coronavirus-covid19-repurposed-treatments-drugs">https://www.sciencenews.org/article/coronavirus-covid19-repurposed-treatments-drugs</a>                                             | USA                      | Treatment only          |    | 22         | 4          | 75            |
| <a href="https://www.vox.com/science-and-health/2020/3/4/21154590/coronavirus-vaccine-treatment-covid-19-drug-cure">https://www.vox.com/science-and-health/2020/3/4/21154590/coronavirus-vaccine-treatment-covid-19-drug-cure</a> | USA                      | Both                    |    | 22         | 4          | 74            |

|                                                                                                                                                                                                                                                       |     |                |    |   |    |
|-------------------------------------------------------------------------------------------------------------------------------------------------------------------------------------------------------------------------------------------------------|-----|----------------|----|---|----|
| <a href="https://en.wikipedia.org/wiki/Coronavirus_disease_2019">https://en.wikipedia.org/wiki/Coronavirus_disease_2019</a>                                                                                                                           | USA | Both           | 25 | 3 | 68 |
| <a href="https://www.bloomberg.com/news/articles/2020-03-25/hydroxychloroquine-no-better-than-regular-covid-19-care-in-study">https://www.bloomberg.com/news/articles/2020-03-25/hydroxychloroquine-no-better-than-regular-covid-19-care-in-study</a> | USA | Treatment only | 21 | 3 | 65 |
| <a href="https://www.theverge.com/2020/2/4/21122327/coronavirus-experimental-medication-treatment-wuhan-china-gilead-hiv">https://www.theverge.com/2020/2/4/21122327/coronavirus-experimental-medication-treatment-wuhan-china-gilead-hiv</a>         | USA | Treatment only | 18 | 4 | 64 |

1  
2  
3  
4  
5  
6  
7  
8  
9  
10  
11  
12  
13  
14  
15  
16  
17  
18  
19  
20  
21  
22  
23  
24  
25  
26  
27  
28  
29  
30  
31  
32  
33  
34  
35  
36  
37  
38  
39  
40  
41  
42  
43  
44  
45  
46  
47  
48  
49  
50  
51  
52  
53  
54  
55  
56  
57  
58  
59  
60

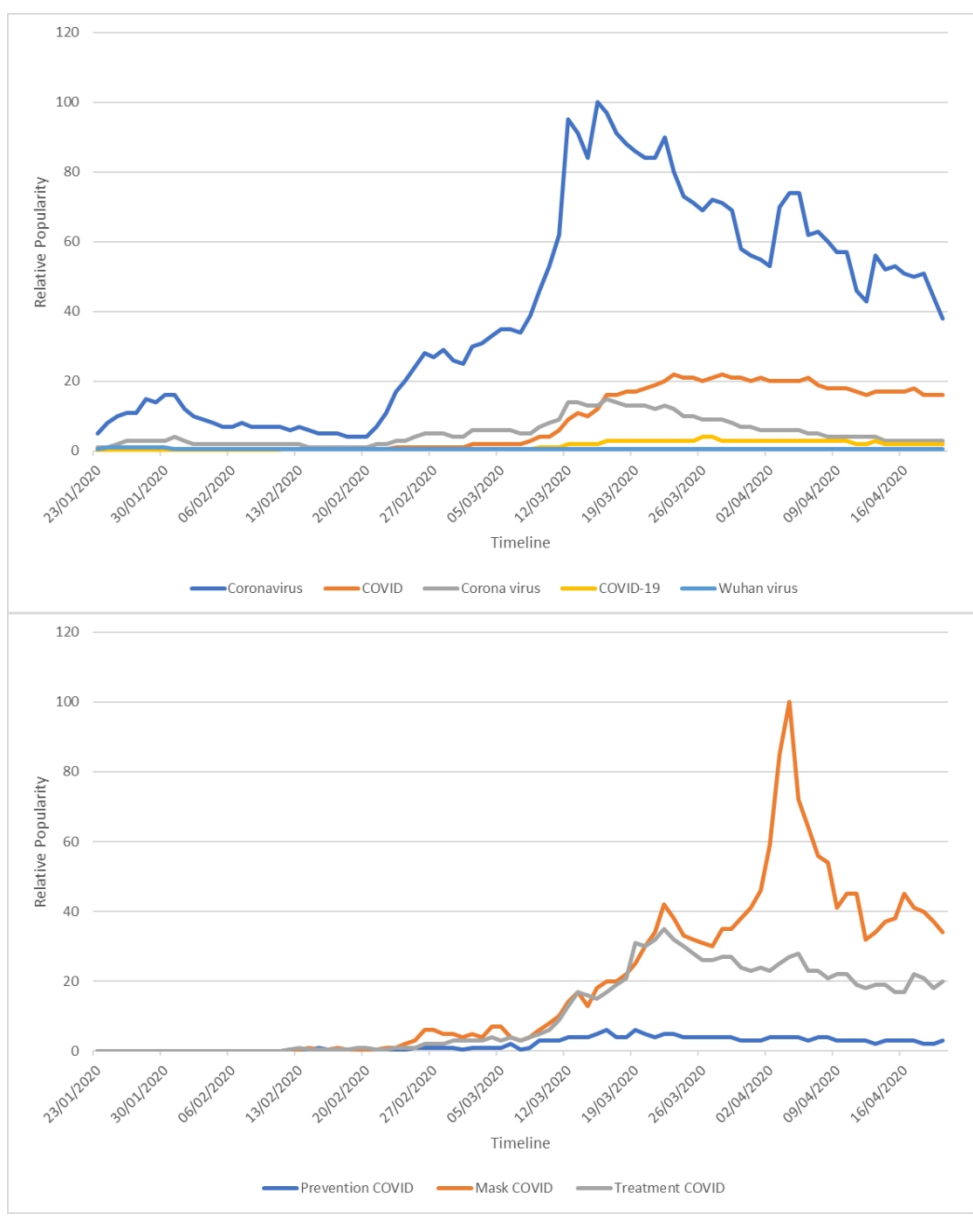

Figure 1. Popular Search Terms  
99x123mm (300 x 300 DPI)



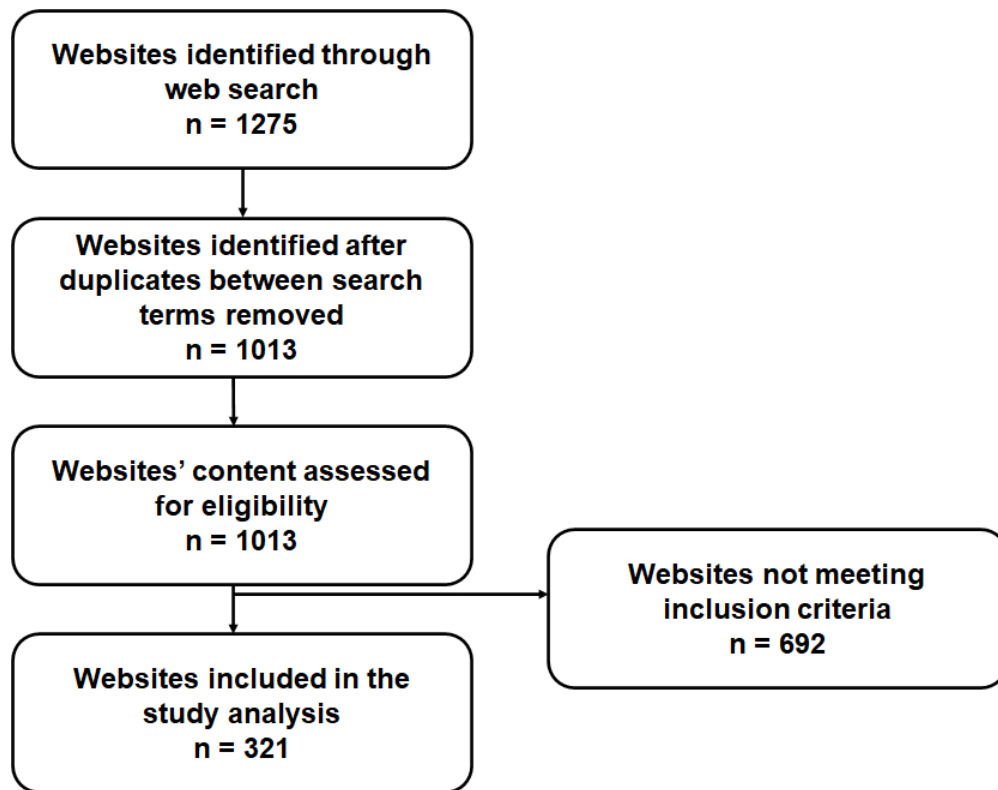

Figure 2. Workflow of Webscraping and Exclusion

70x55mm (300 x 300 DPI)

1  
2  
3  
4  
5  
6  
7  
8  
9  
10  
11  
12  
13  
14  
15  
16  
17  
18  
19  
20  
21  
22  
23  
24  
25  
26  
27  
28  
29  
30  
31  
32  
33  
34  
35  
36  
37  
38  
39  
40  
41  
42  
43  
44  
45  
46  
47  
48  
49  
50  
51  
52  
53  
54  
55  
56  
57  
58  
59  
60

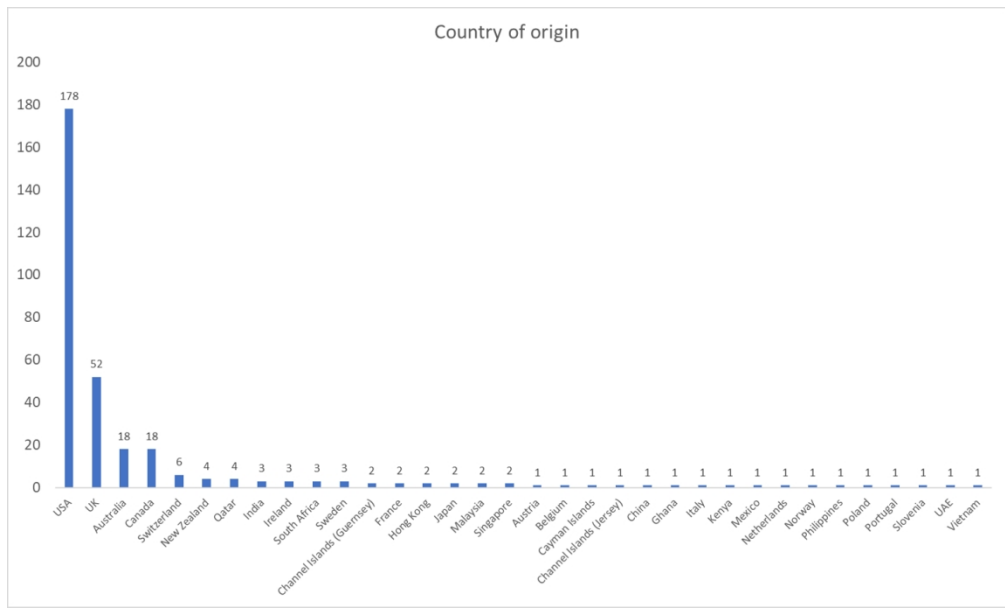

Figure 3. Country of origin of websites

132x79mm (300 x 300 DPI)

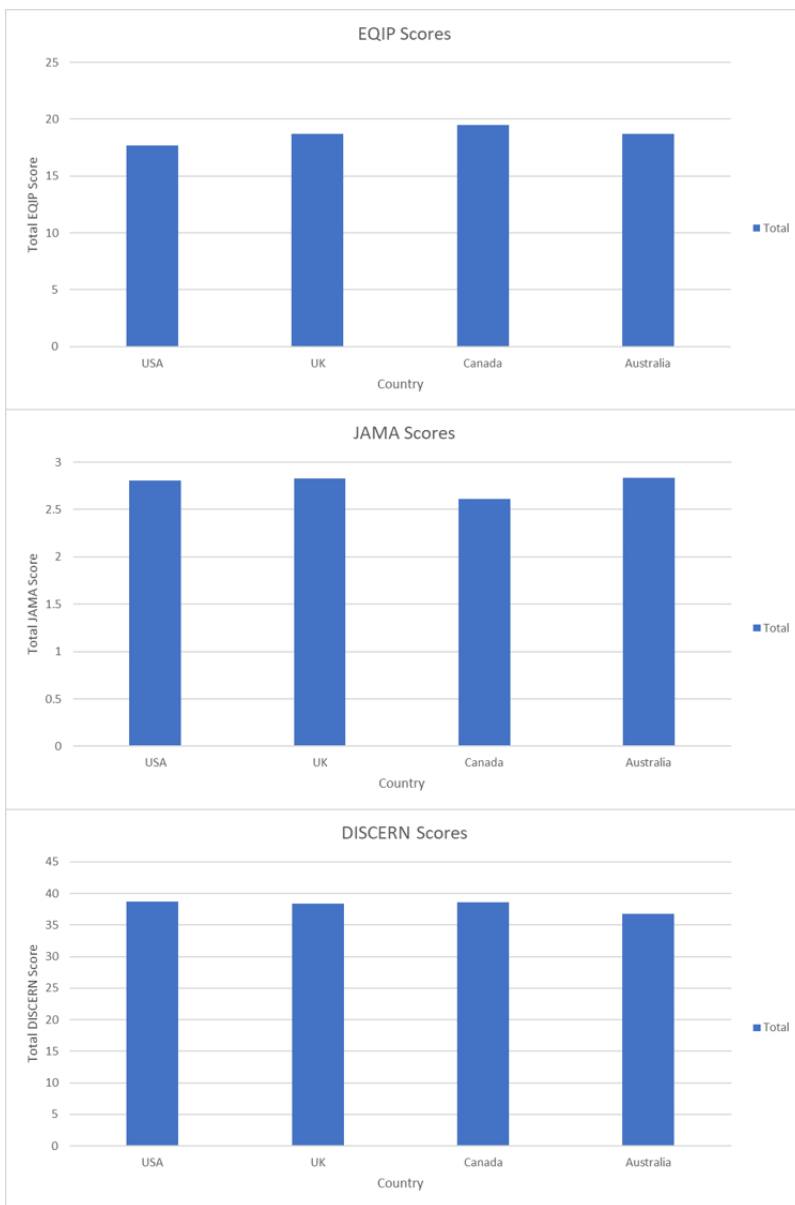

Figure 4. Scores by top contributing countries

63x94mm (300 x 300 DPI)

1  
2  
3  
4  
5  
6  
7  
8  
9  
10  
11  
12  
13  
14  
15  
16  
17  
18  
19  
20  
21  
22  
23  
24  
25  
26  
27  
28  
29  
30  
31  
32  
33  
34  
35  
36  
37  
38  
39  
40  
41  
42  
43  
44  
45  
46  
47  
48  
49  
50  
51  
52  
53  
54  
55  
56  
57  
58  
59  
60

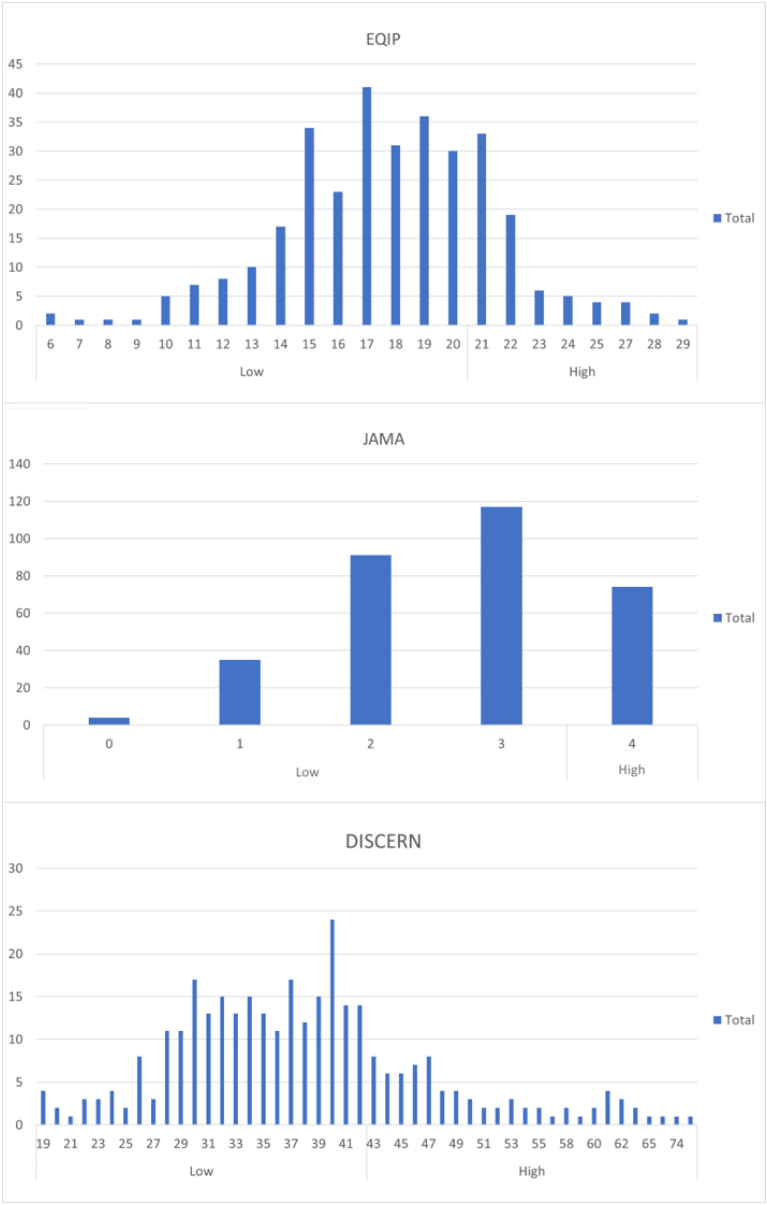

Figure 5. High-score distribution  
60x94mm (300 x 300 DPI)

| Item                                            |     | Overall number of websites (n, %) | High-scoring websites (n, %) | Low-scoring websites (n, %) | OR     |
|-------------------------------------------------|-----|-----------------------------------|------------------------------|-----------------------------|--------|
| <b>Modified EQIP Content Data</b>               |     |                                   |                              |                             |        |
| 1. Initial definition of which subjects will be | Yes | 274 (85.36%)                      | 71 (95.95%)                  | 203 (82.19%)                | 5.102  |
|                                                 | No  | 47 (14.64%)                       | 3 (4.05%)                    | 44 (17.81%)                 |        |
| 2. Coverage of the previously defined           | Yes | 273 (85.05%)                      | 71 (95.95%)                  | 202 (81.78%)                | 3.509  |
|                                                 | No  | 48 (14.95%)                       | 3 (4.05%)                    | 45 (18.22%)                 |        |
| 3. Description of the medical                   | Yes | 251 (78.19%)                      | 73 (98.65%)                  | 178 (72.06%)                | 5.882  |
|                                                 | No  | 70 (21.81%)                       | 1 (1.35%)                    | 69 (27.94%)                 |        |
| 4. Definition of the purpose of the             | Yes | 216 (67.29%)                      | 67 (90.54%)                  | 149 (60.32%)                | 27.778 |
|                                                 | No  | 105 (32.71%)                      | 7 (9.46%)                    | 98 (39.68%)                 |        |
| 5. Description of treatment alternatives        | Yes | 82 (25.55%)                       | 40 (54.05%)                  | 42 (17%)                    | 6.250  |
|                                                 | No  | 239 (74.45%)                      | 34 (45.95%)                  | 205 (83%)                   |        |
| 6. Description of the sequence of the           | Yes | 51 (15.89%)                       | 26 (35.14%)                  | 25 (10.12%)                 | 4.785  |
|                                                 | No  | 270 (84.11%)                      | 48 (64.86%)                  | 222 (89.88%)                |        |
| 7. Description of the qualitative benefits for  | Yes | 114 (35.51%)                      | 46 (62.16%)                  | 68 (27.53%)                 | 4.310  |
|                                                 | No  | 207 (64.49%)                      | 28 (37.84%)                  | 179 (72.47%)                |        |
| 8. Description of the quantitative benefits to  | Yes | 9 (2.8%)                          | 3 (4.05%)                    | 6 (2.43%)                   | 1.695  |
|                                                 | No  | 312 (97.2%)                       | 71 (95.95%)                  | 241 (97.57%)                |        |
| 9. Description of the qualitative risks and     | Yes | 49 (15.26%)                       | 25 (33.78%)                  | 24 (9.72%)                  | 4.717  |
|                                                 | No  | 272 (84.74%)                      | 49 (66.22%)                  | 223 (90.28%)                |        |
| 10. Description of the quantitative risks and   | Yes | 3 (0.93%)                         | 3 (4.05%)                    | 0 (0%)                      | -      |
|                                                 | No  | 318 (99.07%)                      | 71 (95.95%)                  | 247 (100%)                  |        |
| 11. Addressing quality-of-life issues           | Yes | 137 (42.68%)                      | 58 (78.38%)                  | 79 (31.98%)                 | 7.634  |
|                                                 | No  | 184 (57.32%)                      | 16 (21.62%)                  | 168 (68.02%)                |        |
| 12. Description of how complications are        | Yes | 35 (10.9%)                        | 20 (27.03%)                  | 15 (6.07%)                  | 5.682  |
|                                                 | No  | 286 (89.1%)                       | 54 (72.97%)                  | 232 (93.93%)                |        |
| 13. Description of the precautions that the     | Yes | 265 (82.55%)                      | 70 (94.59%)                  | 195 (78.95%)                | 4.651  |
|                                                 | No  | 56 (17.45%)                       | 4 (5.41%)                    | 52 (21.05%)                 |        |
| 14. Mention of alert signs that the patient     | Yes | 212 (66.04%)                      | 66 (89.19%)                  | 146 (59.11%)                | 5.682  |
|                                                 | No  | 109 (33.96%)                      | 8 (10.81%)                   | 101 (40.89%)                |        |
| 15. Addressing medical intervention costs and   | Yes | 68 (21.18%)                       | 31 (41.89%)                  | 37 (14.98%)                 | 3.968  |
|                                                 | No  | 253 (78.82%)                      | 43 (58.11%)                  | 210 (85.02%)                |        |
| 16. Specific contact details for hospital       | Yes | 10 (3.12%)                        | 3 (4.05%)                    | 7 (2.83%)                   | -      |
|                                                 | No  | 311 (96.88%)                      | 71 (95.95%)                  | 240 (97.17%)                |        |

|                                                   |     |              |             |              |       |
|---------------------------------------------------|-----|--------------|-------------|--------------|-------|
| 17. Specific details of other sources of reliable | Yes | 185 (57.63%) | 62 (83.78%) | 123 (49.8%)  | 5.181 |
|                                                   | No  | 136 (42.37%) | 12 (16.22%) | 124 (50.2%)  |       |
| 18. Coverage of all relevant issues for the       | Yes | 4 (1.25%)    | 4 (5.41%)   | 0 (0%)       | -     |
|                                                   | No  | 317 (98.75%) | 70 (94.59%) | 247 (100%)   |       |
| <b>Modified EQIP Identification Data</b>          |     |              |             |              |       |
| 19. Date of issue or revision                     | Yes | 280 (87.23%) | 69 (93.24%) | 211 (85.43%) | 2.347 |
|                                                   | No  | 41 (12.77%)  | 5 (6.76%)   | 36 (14.57%)  |       |
| 20. Logo of the issuing body                      | Yes | 317 (98.75%) | 74 (100%)   | 243 (98.38%) | -     |
|                                                   | No  | 4 (1.25%)    | 0 (0%)      | 4 (1.62%)    |       |
| 21. Names of the persons or entities that         | Yes | 254 (79.13%) | 61 (82.43%) | 193 (78.14%) | 1.312 |
|                                                   | No  | 67 (20.87%)  | 13 (17.57%) | 54 (21.86%)  |       |
| 22. Names of the persons or entities that         | Yes | 210 (65.42%) | 62 (83.78%) | 148 (59.92%) | 3.448 |
|                                                   | No  | 111 (34.58%) | 12 (16.22%) | 99 (40.08%)  |       |
| 23. Short bibliography of the evidence-based data | Yes | 60 (18.69%)  | 31 (41.89%) | 29 (11.74%)  | 5.376 |
|                                                   | No  | 261 (81.31%) | 43 (58.11%) | 218 (88.26%) |       |
| 24. Statement about whether and how               | Yes | 3 (0.93%)    | 1 (1.35%)   | 2 (0.81%)    | 1.675 |
|                                                   | No  | 318 (99.07%) | 73 (98.65%) | 245 (99.19%) |       |
| <b>Modified EQIP Structure Data</b>               |     |              |             |              |       |
| 25. Use of everyday language and                  | Yes | 3 (0.93%)    | 72 (97.3%)  | 229 (92.71%) | 2.825 |
|                                                   | No  | 318 (99.07%) | 2 (5.41%)   | 18 (25.35%)  |       |
| 26. Use of generic names for all medications or   | Yes | 88 (27.41%)  | 35 (47.3%)  | 53 (21.46%)  | 1.838 |
|                                                   | No  | 233 (44.05%) | 39 (35.14%) | 194 (46.41%) |       |
| 27. Use of short sentences (<15 words on          | Yes | 296 (92.21%) | 72 (97.3%)  | 224 (90.69%) | 3.690 |
|                                                   | No  | 25 (9.47%)   | 2 (2.99%)   | 23 (11.68%)  |       |
| 28. Personal address to the reader                | Yes | 239 (74.45%) | 65 (87.84%) | 174 (70.45%) | 3.021 |
|                                                   | No  | 82 (21.03%)  | 9 (10.98%)  | 73 (23.7%)   |       |
| 29. Respectful tone                               | Yes | 308 (95.95%) | 73 (98.65%) | 235 (95.14%) | 3.717 |
|                                                   | No  | 13 (4.22%)   | 1 (1.35%)   | 12 (5.13%)   |       |
| 30. Clear information (no ambiguities or          | Yes | 295 (91.9%)  | 73 (98.65%) | 222 (89.88%) | 8.197 |
|                                                   | No  | 26 (31.71%)  | 1 (3.33%)   | 25 (48.08%)  |       |
| 31. Balanced information on risks and benefits    | Yes | 56 (17.45%)  | 29 (39.19%) | 27 (10.93%)  | 5.208 |
|                                                   | No  | 265 (47.58%) | 45 (37.82%) | 220 (50.23%) |       |
| 32. Presentation of information in a logical      | Yes | 292 (90.97%) | 74 (100%)   | 218 (88.26%) | -     |
|                                                   | No  | 29 (9.12%)   | 0 (0%)      | 29 (11.84%)  |       |

|                                                     |     |              |             |              |        |
|-----------------------------------------------------|-----|--------------|-------------|--------------|--------|
| 33. Satisfactory design and layout (excluding       | Yes | 289 (90.03%) | 73 (98.65%) | 216 (87.45%) | 10.417 |
|                                                     | No  | 32 (22.38%)  | 1 (2.33%)   | 31 (31%)     |        |
| 34. Clear and relevant figures or graphs (NA if     | Yes | 111 (34.58%) | 42 (56.76%) | 69 (27.94%)  | 12.987 |
|                                                     | No  | 210 (75.27%) | 32 (65.31%) | 178 (77.39%) |        |
| 35. Inclusion of a named space for the reader's     | Yes | 69 (21.5%)   | 17 (22.97%) | 52 (21.05%)  | 1.119  |
|                                                     | No  | 252 (100%)   | 57 (100%)   | 195 (100%)   |        |
| 36. Inclusion of a printed consent form contrary to | Yes | 0 (0%)       | 0 (0%)      | 0 (0%)       | -      |
|                                                     | No  | 321 (100%)   | 74 (100%)   | 247 (100%)   |        |

\*Some data is omitted due to odds ratio and confidence interval being infinite values

For peer review only

1  
2  
3  
4  
5  
6  
7  
8  
9  
10  
11  
12  
13  
14  
15  
16  
17  
18  
19  
20  
21  
22  
23  
24  
25  
26  
27  
28  
29  
30  
31  
32  
33  
34  
35  
36  
37  
38  
39  
40  
41  
42  
43  
44  
45  
46

| 95% CI           | P Value |
|------------------|---------|
|                  |         |
| 1.560 - 26.316   | 0.002   |
| 0.483 - 166.667  | 0.300   |
| 3.215 - 10.870   | <0.001  |
| 4.695 - 1000.000 | <0.001  |
| 2.725 - 16.949   | <0.001  |
| 2.427 - 9.434    | <0.001  |
| 2.416 - 7.752    | <0.001  |
| 0.267 - 8.197    | 0.436   |
| 2.370 - 9.434    | <0.001  |
| -                | 0.012   |
| 4.032 - 15.152   | <0.001  |
| 2.584 - 12.821   | <0.001  |
| 1.621 - 18.519   | 0.001   |
| 2.571 - 14.286   | <0.001  |
| 2.137 - 7.407    | <0.001  |
| -                | 0.228   |

For peer review only



|                 |        |
|-----------------|--------|
| 2.604 - 11.111  | <0.001 |
| -               | 0.003  |
|                 |        |
| 0.870 - 8.000   | 0.110  |
| -               | 0.577  |
| 0.652 - 2.801   | 0.515  |
| 1.727 - 7.407   | <0.001 |
| 1.727 - 7.407   | <0.001 |
| 1.727 - 7.407   | 0.546  |
|                 |        |
| 0.650 - 25.64   | 0.181  |
| 0.561 - 7.143   | 0.309  |
| 0.875 - 33.333  | 0.082  |
| 1.401 - 7.299   | 0.002  |
| 0.533 - 166.667 | 0.312  |
| 1.294 - 333.333 | 0.013  |
| 2.703 - 10.101  | <0.001 |
| -               | 0.001  |

|                 |        |
|-----------------|--------|
| 1.675 - 500.000 | 0.003  |
| 3.086 - 111.111 | <0.001 |
| 0.561 - 2.151   | 0.748  |
| -               | -      |

For peer review only

| Item                                                                      |     | Overall number of websites (n, %) | High-scoring websites (n, %) | Low-scoring websites (n,%) |
|---------------------------------------------------------------------------|-----|-----------------------------------|------------------------------|----------------------------|
| <b>JAMA Benchmark</b>                                                     |     |                                   |                              |                            |
| 1. Authorship: Authors and contributors, their affiliations,              | Yes | 183 (57.01%)                      | 74 (100%)                    | 109 (44.13%)               |
|                                                                           | No  | 138 (42.99%)                      | 0 (0%)                       | 138 (55.87%)               |
| 2. Attribution: References and sources for all content should             | Yes | 118 (36.76%)                      | 74 (100%)                    | 44 (17.81%)                |
|                                                                           | No  | 203 (63.24%)                      | 0 (0%)                       | 203 (82.19%)               |
| 3. Disclosure: Web site "ownership", sponsorship, funding arrangements or | Yes | 287 (89.41%)                      | 74 (100%)                    | 213 (86.23%)               |
|                                                                           | No  | 34 (10.59%)                       | 0 (0%)                       | 34 (13.77%)                |
| 4. Currency: Dates that content was posted and updated                    | Yes | 276 (85.98%)                      | 74 (100%)                    | 202 (81.78%)               |
|                                                                           | No  | 45 (14.02%)                       | 0 (0%)                       | 45 (18.22%)                |

\*Some data is omitted due to odds ratio and confidence interval being inf

1  
2  
3  
4  
5  
6  
7  
8  
9  
10  
11  
12  
13  
14  
15  
16  
17  
18  
19  
20  
21  
22  
23  
24  
25  
26  
27  
28  
29  
30  
31  
32  
33  
34  
35  
36  
37  
38  
39  
40  
41  
42  
43  
44  
45  
46

| OR            | 95% CI | P Value |
|---------------|--------|---------|
|               |        |         |
| -             | -      | <0.001  |
| -             | -      | <0.001  |
| -             | -      | <0.001  |
| -             | -      | <0.001  |
| finite values |        |         |

For peer review only

| Item                                                                                                                 | Score | Overall number of websites<br>(n, %) | High-scoring websites (n,%) | Low-scoring websites (n,%) |
|----------------------------------------------------------------------------------------------------------------------|-------|--------------------------------------|-----------------------------|----------------------------|
| <b>DISCERN Reliability</b>                                                                                           |       |                                      |                             |                            |
| 1. Are the aims clear?                                                                                               | 1     | 6 (1.87%)                            | 0 (0%)                      | 6 (2.45%)                  |
|                                                                                                                      | 2     | 16 (4.98%)                           | 2 (2.63%)                   | 14 (5.71%)                 |
|                                                                                                                      | 3     | 39 (12.15%)                          | 9 (11.84%)                  | 30 (12.24%)                |
|                                                                                                                      | 4     | 51 (15.89%)                          | 6 (7.89%)                   | 45 (18.37%)                |
|                                                                                                                      | 5     | 209 (65.11%)                         | 59 (77.63%)                 | 150 (61.22%)               |
| 2. Does it achieve its aims                                                                                          | 1     | 7 (2.18%)                            | 0 (0%)                      | 7 (2.86%)                  |
|                                                                                                                      | 2     | 18 (5.61%)                           | 4 (5.26%)                   | 14 (5.71%)                 |
|                                                                                                                      | 3     | 45 (14.02%)                          | 10 (13.16%)                 | 35 (14.29%)                |
|                                                                                                                      | 4     | 57 (17.76%)                          | 8 (10.53%)                  | 49 (20%)                   |
|                                                                                                                      | 5     | 194 (60.44%)                         | 54 (71.05%)                 | 140 (57.14%)               |
| 3. Is it relevant?                                                                                                   | 1     | 4 (1.25%)                            | 0 (0%)                      | 4 (1.63%)                  |
|                                                                                                                      | 2     | 17 (5.3%)                            | 3 (3.95%)                   | 14 (5.71%)                 |
|                                                                                                                      | 3     | 42 (13.08%)                          | 14 (18.42%)                 | 28 (11.43%)                |
|                                                                                                                      | 4     | 64 (19.94%)                          | 3 (3.95%)                   | 61 (24.9%)                 |
|                                                                                                                      | 5     | 194 (60.44%)                         | 56 (73.68%)                 | 138 (56.33%)               |
| 4. Is it clear what sources of information were used to compile the publication (other than the author or producer)? | 1     | 68 (21.18%)                          | 3 (3.95%)                   | 65 (26.53%)                |
|                                                                                                                      | 2     | 67 (20.87%)                          | 3 (3.95%)                   | 64 (26.12%)                |
|                                                                                                                      | 3     | 72 (22.43%)                          | 14 (18.42%)                 | 58 (23.67%)                |
|                                                                                                                      | 4     | 48 (14.95%)                          | 15 (19.74%)                 | 33 (13.47%)                |
|                                                                                                                      | 5     | 66 (20.56%)                          | 41 (53.95%)                 | 25 (10.2%)                 |
| 5. Is it clear when the information used or reported in the publication was produced?                                | 1     | 83 (25.86%)                          | 2 (2.63%)                   | 81 (33.06%)                |
|                                                                                                                      | 2     | 78 (24.3%)                           | 12 (15.79%)                 | 66 (26.94%)                |
|                                                                                                                      | 3     | 88 (27.41%)                          | 28 (36.84%)                 | 60 (24.49%)                |
|                                                                                                                      | 4     | 36 (11.21%)                          | 11 (14.47%)                 | 25 (10.2%)                 |
|                                                                                                                      | 5     | 36 (11.21%)                          | 23 (30.26%)                 | 13 (5.31%)                 |
| 6. Is it balanced and unbiased?                                                                                      | 1     | 24 (7.48%)                           | 4 (5.26%)                   | 20 (8.16%)                 |
|                                                                                                                      | 2     | 65 (20.25%)                          | 16 (21.05%)                 | 49 (20%)                   |
|                                                                                                                      | 3     | 146 (45.48%)                         | 33 (43.42%)                 | 113 (46.12%)               |
|                                                                                                                      | 4     | 69 (21.5%)                           | 14 (18.42%)                 | 55 (22.45%)                |
|                                                                                                                      | 5     | 17 (5.3%)                            | 9 (11.84%)                  | 8 (3.27%)                  |
|                                                                                                                      | 1     | 77 (23.99%)                          | 4 (5.26%)                   | 73 (29.8%)                 |

|                                                                                |   |              |             |              |
|--------------------------------------------------------------------------------|---|--------------|-------------|--------------|
| 7. Does it provide details of additional sources of support and information?   | 2 | 64 (19.94%)  | 15 (19.74%) | 49 (20%)     |
|                                                                                | 3 | 62 (19.31%)  | 19 (25%)    | 43 (17.55%)  |
|                                                                                | 4 | 58 (18.07%)  | 17 (22.37%) | 41 (16.73%)  |
|                                                                                | 5 | 60 (18.69%)  | 21 (27.63%) | 39 (15.92%)  |
| 8. Does it refer to areas of uncertainty?                                      | 1 | 99 (30.84%)  | 14 (18.42%) | 85 (34.69%)  |
|                                                                                | 2 | 61 (19%)     | 15 (19.74%) | 46 (18.78%)  |
|                                                                                | 3 | 75 (23.36%)  | 24 (31.58%) | 51 (20.82%)  |
|                                                                                | 4 | 44 (13.71%)  | 10 (13.16%) | 34 (13.88%)  |
|                                                                                | 5 | 42 (13.08%)  | 13 (17.11%) | 29 (11.84%)  |
| <b>DISCERN Quality and Overall rating</b>                                      |   |              |             |              |
| 9. Does it describe how each treatment works?                                  | 1 | 250 (77.88%) | 52 (68.42%) | 198 (80.82%) |
|                                                                                | 2 | 24 (7.48%)   | 8 (10.53%)  | 16 (6.53%)   |
|                                                                                | 3 | 18 (5.61%)   | 4 (5.26%)   | 14 (5.71%)   |
|                                                                                | 4 | 13 (4.05%)   | 6 (7.89%)   | 7 (2.86%)    |
|                                                                                | 5 | 16 (4.98%)   | 6 (7.89%)   | 10 (4.08%)   |
| 10. Does it describe the benefits of each treatment?                           | 1 | 247 (76.95%) | 52 (68.42%) | 195 (79.59%) |
|                                                                                | 2 | 20 (6.23%)   | 6 (7.89%)   | 14 (5.71%)   |
|                                                                                | 3 | 26 (8.1%)    | 6 (7.89%)   | 20 (8.16%)   |
|                                                                                | 4 | 20 (6.23%)   | 7 (9.21%)   | 13 (5.31%)   |
|                                                                                | 5 | 8 (2.49%)    | 5 (6.58%)   | 3 (1.22%)    |
| 11. Does it describe the risks of each treatment?                              | 1 | 281 (87.54%) | 60 (78.95%) | 221 (90.2%)  |
|                                                                                | 2 | 18 (5.61%)   | 6 (7.89%)   | 12 (4.9%)    |
|                                                                                | 3 | 17 (5.3%)    | 7 (9.21%)   | 10 (4.08%)   |
|                                                                                | 4 | 3 (0.93%)    | 1 (1.32%)   | 2 (0.82%)    |
|                                                                                | 5 | 2 (0.62%)    | 2 (2.63%)   | 0 (0%)       |
| 12. Does it describe what would happen if no treatment is used?                | 1 | 283 (88.16%) | 61 (80.26%) | 222 (90.61%) |
|                                                                                | 2 | 15 (4.67%)   | 6 (7.89%)   | 9 (3.67%)    |
|                                                                                | 3 | 13 (4.05%)   | 5 (6.58%)   | 8 (3.27%)    |
|                                                                                | 4 | 7 (2.18%)    | 2 (2.63%)   | 5 (2.04%)    |
|                                                                                | 5 | 3 (0.93%)    | 2 (2.63%)   | 1 (0.41%)    |
| 13. Does it describe how the treatment choices affect overall quality of life? | 1 | 289 (90.03%) | 62 (81.58%) | 227 (92.65%) |
|                                                                                | 2 | 13 (4.05%)   | 5 (6.58%)   | 8 (3.27%)    |
|                                                                                | 3 | 14 (4.36%)   | 8 (10.53%)  | 6 (2.45%)    |
|                                                                                | 4 | 2 (0.62%)    | 0 (0%)      | 2 (0.82%)    |

|                                                                                                                                      |   |              |             |              |
|--------------------------------------------------------------------------------------------------------------------------------------|---|--------------|-------------|--------------|
|                                                                                                                                      | 5 | 3 (0.93%)    | 1 (1.32%)   | 2 (0.82%)    |
| 14. Is it clear that there may be more than one possible treatment choice?                                                           | 1 | 240 (74.77%) | 52 (68.42%) | 188 (76.73%) |
|                                                                                                                                      | 2 | 18 (5.61%)   | 5 (6.58%)   | 13 (5.31%)   |
|                                                                                                                                      | 3 | 24 (7.48%)   | 6 (7.89%)   | 18 (7.35%)   |
|                                                                                                                                      | 4 | 10 (3.12%)   | 2 (2.63%)   | 8 (3.27%)    |
|                                                                                                                                      | 5 | 29 (9.03%)   | 11 (14.47%) | 18 (7.35%)   |
| 15. Does it provide support for shared decision-making?                                                                              | 1 | 262 (81.62%) | 59 (77.63%) | 203 (82.86%) |
|                                                                                                                                      | 2 | 13 (4.05%)   | 7 (9.21%)   | 6 (2.45%)    |
|                                                                                                                                      | 3 | 35 (10.9%)   | 4 (5.26%)   | 31 (12.65%)  |
|                                                                                                                                      | 4 | 3 (0.93%)    | 2 (2.63%)   | 1 (0.41%)    |
|                                                                                                                                      | 5 | 8 (2.49%)    | 4 (5.26%)   | 4 (1.63%)    |
| 16. Based on the answers to all of the above questions, rate the overall quality of the publication as a source of information about | 1 | 241 (75.08%) | 52 (68.42%) | 189 (77.14%) |
|                                                                                                                                      | 2 | 48 (14.95%)  | 12 (15.79%) | 36 (14.69%)  |
|                                                                                                                                      | 3 | 25 (7.79%)   | 8 (10.53%)  | 17 (6.94%)   |
|                                                                                                                                      | 4 | 7 (2.18%)    | 4 (5.26%)   | 3 (1.22%)    |
|                                                                                                                                      | 5 | 0 (0%)       | 0 (0%)      | 0 (0%)       |

1  
2  
3  
4  
5  
6  
7  
8  
9  
10  
11  
12  
13  
14  
15  
16  
17  
18  
19  
20  
21  
22  
23  
24  
25  
26  
27  
28  
29  
30  
31  
32  
33  
34  
35  
36  
37  
38  
39  
40  
41  
42  
43  
44  
45  
46

| P Value |
|---------|
| 0.321   |
| 0.246   |
| 0.032   |
| 0.019   |
| 0.007   |
| <0.001  |
|         |

For peer review only



|    |        |
|----|--------|
| 1  |        |
| 2  |        |
| 3  | 0.093  |
| 4  |        |
| 5  |        |
| 6  |        |
| 7  |        |
| 8  | <0.001 |
| 9  |        |
| 10 |        |
| 11 |        |
| 12 |        |
| 13 |        |
| 14 |        |
| 15 | 0.005  |
| 16 |        |
| 17 |        |
| 18 |        |
| 19 |        |
| 20 |        |
| 21 | <0.001 |
| 22 |        |
| 23 |        |
| 24 |        |
| 25 |        |
| 26 |        |
| 27 | 0.016  |
| 28 |        |
| 29 |        |
| 30 |        |
| 31 |        |
| 32 |        |
| 33 | <0.001 |
| 34 |        |
| 35 |        |
| 36 |        |
| 37 |        |
| 38 |        |
| 39 | <0.001 |
| 40 |        |
| 41 |        |

For peer review only

1  
2  
3  
4  
5  
6  
7  
8  
9  
10  
11  
12  
13  
14  
15  
16  
17  
18  
19  
20  
21  
22  
23  
24  
25  
26  
27  
28  
29  
30  
31  
32  
33  
34  
35  
36  
37  
38  
39  
40  
41  
42  
43  
44  
45  
46

|        |
|--------|
|        |
| <0.001 |
| <0.001 |
| <0.001 |

For peer review only

| URL                                                                                                                   | Country   | Original search term               | Texas, USA March | Texas, USA July | London, UK July | Toronto, C |
|-----------------------------------------------------------------------------------------------------------------------|-----------|------------------------------------|------------------|-----------------|-----------------|------------|
| <b>Top Scoring EQIP Sites</b>                                                                                         |           |                                    |                  |                 |                 |            |
| <a href="https://www.gov.ie/health/https://en.wikipedia.org/">https://www.gov.ie/health/https://en.wikipedia.org/</a> | UK        | What is self isolation coronavirus | Page 4           | None            | None            | No         |
| <a href="https://www.kinedia.org/">https://www.kinedia.org/</a>                                                       | USA       | Coronavirus                        | Page 1           | None            | None            | No         |
| <a href="https://www.health.nsw.gov.au/">https://www.health.nsw.gov.au/</a>                                           | Australia | Covid 19                           | Page 10          | Page 4          | None            | No         |
| <a href="https://www.ageuk.org.uk/">https://www.ageuk.org.uk/</a>                                                     | UK        | Stop getting coronavirus           | Page 6           | Page 4          | Page 2          | No         |
| <a href="https://www.wikihow.co">https://www.wikihow.co</a>                                                           | USA       | Stop getting coronavirus           | Page 10          | None            | None            | No         |
| <b>Top Scoring DISCERN Sites</b>                                                                                      |           |                                    |                  |                 |                 |            |
| <a href="https://www.sciencenews.org/">https://www.sciencenews.org/</a>                                               | USA       | How to treat coronavirus           | Page 10          | None            | None            | No         |
| <a href="https://www.vox.com/science/">https://www.vox.com/science/</a>                                               | USA       | Drugs for coronavirus              | Page 3           | None            | None            | No         |
| <a href="https://en.wikipedia.org/">https://en.wikipedia.org/</a>                                                     | USA       | Covid 19                           | Page 1           | Page 1          | Page 1          | No         |
| <a href="https://www.kinedia.org/">https://www.kinedia.org/</a>                                                       | USA       | Drugs for coronavirus              | Page 1           | None            | None            | No         |
| <a href="https://www.bloomberg.com/">https://www.bloomberg.com/</a>                                                   | USA       | Drugs for coronavirus              | Page 32          | None            | None            | No         |
| <a href="https://www.theverge.co">https://www.theverge.co</a>                                                         |           |                                    |                  |                 |                 |            |

1  
2  
3  
4  
5  
6  
7  
8  
9  
10  
11  
12  
13  
14  
15  
16  
17  
18  
19  
20  
21  
22  
23  
24  
25  
26  
27  
28  
29  
30  
31  
32  
33  
34  
35  
36  
37  
38  
39  
40  
41  
42  
43  
44  
45  
46

| <b>Canada July</b> | <b>Sydney, Australia July</b> | <b>URL Changes</b> |
|--------------------|-------------------------------|--------------------|
| ine                | None                          | Same               |
| ine                | None                          | Changed            |
| ine                | Page 1                        | Same               |
| ine                | None                          | Same               |
| ine                | Page 9                        | Same               |
| ine                | None                          | Same               |
| ine                | None                          | Same               |

For peer review only

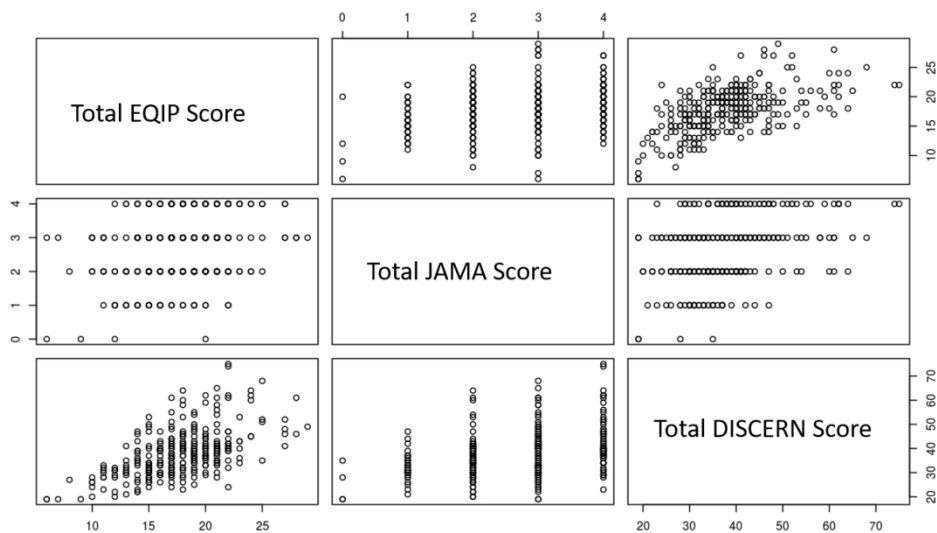

238x141mm (150 x 150 DPI)

1  
2  
3  
4  
5  
6  
7  
8  
9  
10  
11  
12  
13  
14  
15  
16  
17  
18  
19  
20  
21  
22  
23  
24  
25  
26  
27  
28  
29  
30  
31  
32  
33  
34  
35  
36  
37  
38  
39  
40  
41  
42  
43  
44  
45  
46  
47  
48  
49  
50  
51  
52  
53  
54  
55  
56  
57  
58  
59  
60

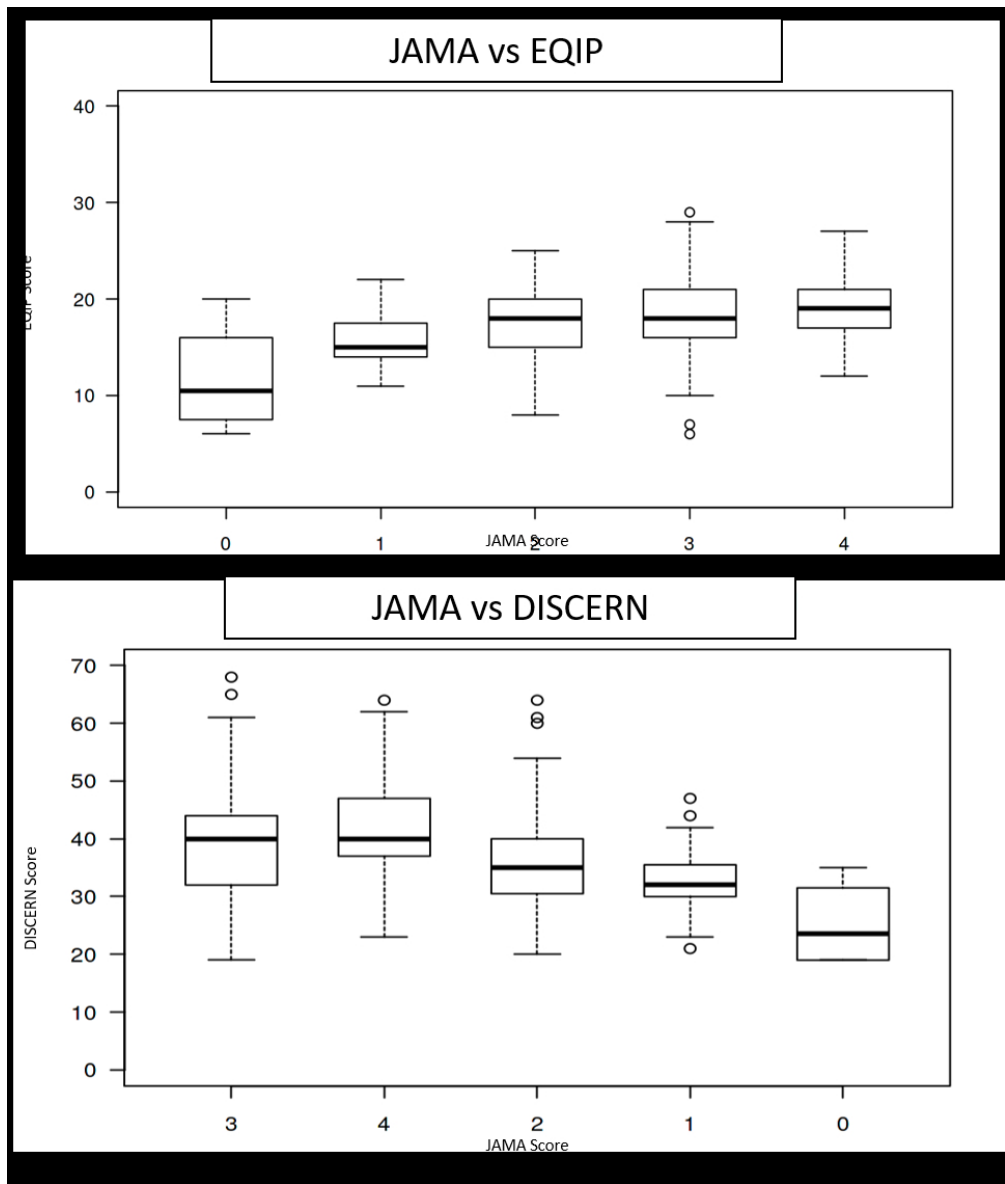

163x191mm (150 x 150 DPI)

1  
2  
3  
4  
5  
6  
7  
8  
9  
10  
11  
12  
13  
14  
15  
16  
17  
18  
19  
20  
21  
22  
23  
24  
25  
26  
27  
28  
29  
30  
31  
32  
33  
34  
35  
36  
37  
38  
39  
40  
41  
42  
43  
44  
45  
46  
47  
48  
49  
50  
51  
52  
53  
54  
55  
56  
57  
58  
59  
60

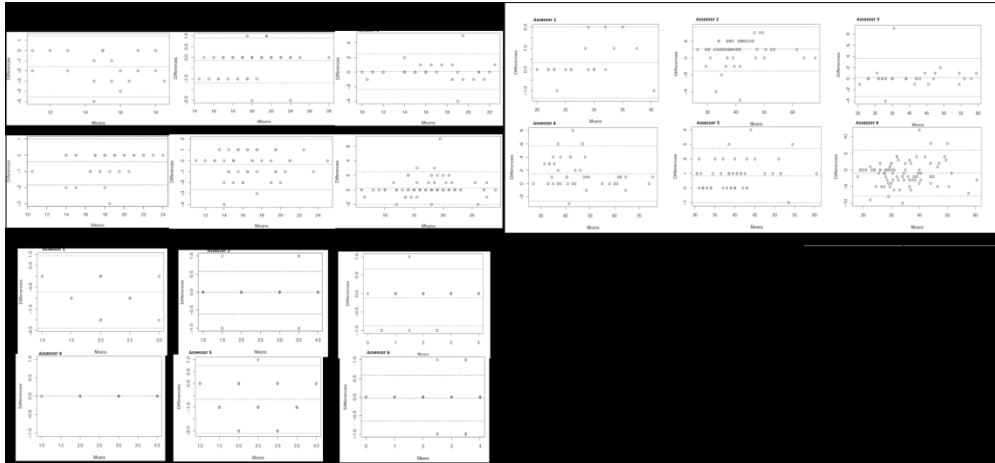

333x154mm (150 x 150 DPI)

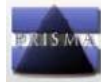

# PRISMA 2009 Checklist

| Section/topic                      | #  | Checklist item                                                                                                                                                                                                                                                                                              | Reported on page # |
|------------------------------------|----|-------------------------------------------------------------------------------------------------------------------------------------------------------------------------------------------------------------------------------------------------------------------------------------------------------------|--------------------|
| <b>TITLE</b>                       |    |                                                                                                                                                                                                                                                                                                             |                    |
| Title                              | 1  | Identify the report as a systematic review, meta-analysis, or both.                                                                                                                                                                                                                                         | 2                  |
| <b>ABSTRACT</b>                    |    |                                                                                                                                                                                                                                                                                                             |                    |
| Structured summary                 | 2  | Provide a structured summary including, as applicable: background; objectives; data sources; study eligibility criteria, participants, and interventions; study appraisal and synthesis methods; results; limitations; conclusions and implications of key findings; systematic review registration number. | 3                  |
| <b>INTRODUCTION</b>                |    |                                                                                                                                                                                                                                                                                                             |                    |
| Rationale                          | 3  | Describe the rationale for the review in the context of what is already known.                                                                                                                                                                                                                              | 4-7                |
| Objectives                         | 4  | Provide an explicit statement of questions being addressed with reference to participants, interventions, comparisons, outcomes, and study design (PICOS).                                                                                                                                                  | 4-7                |
| <b>METHODS</b>                     |    |                                                                                                                                                                                                                                                                                                             |                    |
| Protocol and registration          | 5  | Indicate if a review protocol exists, if and where it can be accessed (e.g., Web address), and, if available, provide registration information including registration number.                                                                                                                               | 7-8                |
| Eligibility criteria               | 6  | Specify study characteristics (e.g., PICOS, length of follow-up) and report characteristics (e.g., years considered, language, publication status) used as criteria for eligibility, giving rationale.                                                                                                      | 7-9                |
| Information sources                | 7  | Describe all information sources (e.g., databases with dates of coverage, contact with study authors to identify additional studies) in the search and date last searched.                                                                                                                                  | 7-9                |
| Search                             | 8  | Present full electronic search strategy for at least one database, including any limits used, such that it could be repeated.                                                                                                                                                                               | 7-9                |
| Study selection                    | 9  | State the process for selecting studies (i.e., screening, eligibility, included in systematic review, and, if applicable, included in the meta-analysis).                                                                                                                                                   | 6-9                |
| Data collection process            | 10 | Describe method of data extraction from reports (e.g., piloted forms, independently, in duplicate) and any processes for obtaining and confirming data from investigators.                                                                                                                                  | 8-12               |
| Data items                         | 11 | List and define all variables for which data were sought (e.g., PICOS, funding sources) and any assumptions and simplifications made.                                                                                                                                                                       | 8-12               |
| Risk of bias in individual studies | 12 | Describe methods used for assessing risk of bias of individual studies (including specification of whether this was done at the study or outcome level), and how this information is to be used in any data synthesis.                                                                                      | 12                 |
| Summary measures                   | 13 | State the principal summary measures (e.g., risk ratio, difference in means).                                                                                                                                                                                                                               | 8-12               |
| Synthesis of results               | 14 | Describe the methods of handling data and combining results of studies, if done, including measures of consistency (e.g., I <sup>2</sup> ) for each meta-analysis.                                                                                                                                          | 12                 |



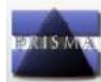

# PRISMA 2009 Checklist

Page 1 of 2

| Section/topic                 | #  | Checklist item                                                                                                                                                                                           | Reported on page # |
|-------------------------------|----|----------------------------------------------------------------------------------------------------------------------------------------------------------------------------------------------------------|--------------------|
| Risk of bias across studies   | 15 | Specify any assessment of risk of bias that may affect the cumulative evidence (e.g., publication bias, selective reporting within studies).                                                             | N/A                |
| Additional analyses           | 16 | Describe methods of additional analyses (e.g., sensitivity or subgroup analyses, meta-regression), if done, indicating which were pre-specified.                                                         | N/A                |
| <b>RESULTS</b>                |    |                                                                                                                                                                                                          |                    |
| Study selection               | 17 | Give numbers of studies screened, assessed for eligibility, and included in the review, with reasons for exclusions at each stage, ideally with a flow diagram.                                          | 12, Figure 2       |
| Study characteristics         | 18 | For each study, present characteristics for which data were extracted (e.g., study size, PICOS, follow-up period) and provide the citations.                                                             | 12-13              |
| Risk of bias within studies   | 19 | Present data on risk of bias of each study and, if available, any outcome level assessment (see item 12).                                                                                                | 15                 |
| Results of individual studies | 20 | For all outcomes considered (benefits or harms), present, for each study: (a) simple summary data for each intervention group (b) effect estimates and confidence intervals, ideally with a forest plot. | N/A                |
| Synthesis of results          | 21 | Present results of each meta-analysis done, including confidence intervals and measures of consistency.                                                                                                  | N/A                |
| Risk of bias across studies   | 22 | Present results of any assessment of risk of bias across studies (see Item 15).                                                                                                                          | N/A                |
| Additional analysis           | 23 | Give results of additional analyses, if done (e.g., sensitivity or subgroup analyses, meta-regression [see Item 16]).                                                                                    | 10-14              |
| <b>DISCUSSION</b>             |    |                                                                                                                                                                                                          |                    |
| Summary of evidence           | 24 | Summarize the main findings including the strength of evidence for each main outcome; consider their relevance to key groups (e.g., healthcare providers, users, and policy makers).                     | 16-24              |
| Limitations                   | 25 | Discuss limitations at study and outcome level (e.g., risk of bias), and at review-level (e.g., incomplete retrieval of identified research, reporting bias).                                            | 24-25              |
| Conclusions                   | 26 | Provide a general interpretation of the results in the context of other evidence, and implications for future research.                                                                                  | 24                 |
| <b>FUNDING</b>                |    |                                                                                                                                                                                                          |                    |
| Funding                       | 27 | Describe sources of funding for the systematic review and other support (e.g., supply of data); role of funders for the systematic review.                                                               | 2                  |

From: Moher D, Liberati A, Tetzlaff J, Altman DG, The PRISMA Group (2009). Preferred Reporting Items for Systematic Reviews and Meta-Analyses: The PRISMA Statement. PLoS Med 6(7): e1000097. doi:10.1371/journal.pmed1000097

For more information, visit: [www.prisma-statement.org](http://www.prisma-statement.org).

Page 2 of 2

For peer review only - <http://bmjopen.bmj.com/site/about/guidelines.xhtml>
