# Supplementary figures and images for: COVID-19 prevention and treatment information on the internet: a systematic analysis and quality assessment
Source: PubMed Central journal article supplement — BMJ Open. 2020 Sep 10;10(9):e040487. doi: 10.1136/bmjopen-2020-040487 (PMC7485261; doi:10.1136/bmjopen-2020-040487), 2020-09-10

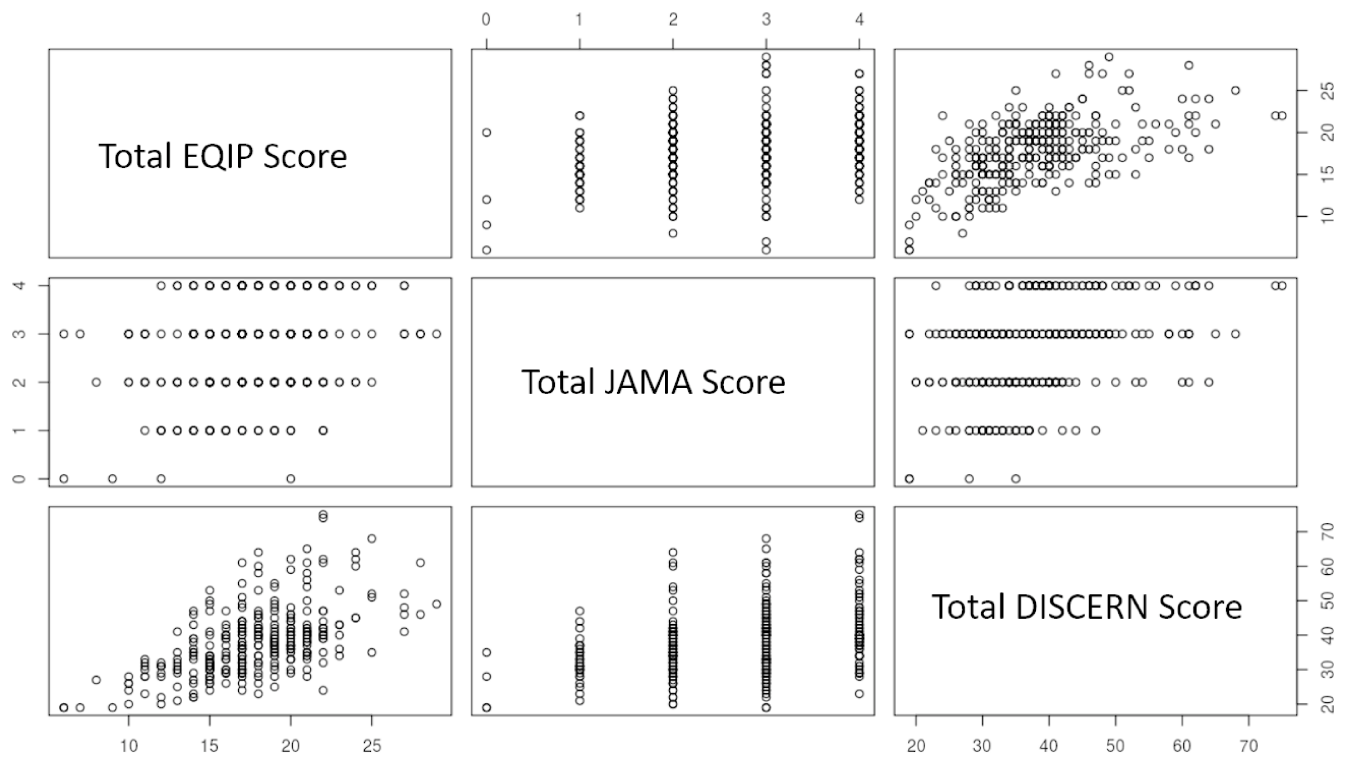

Supplement: bmjopen-2020-040487supp004.pdf [file bmjopen-2020-040487supp004.pdf]

### JAMA vs EQIP

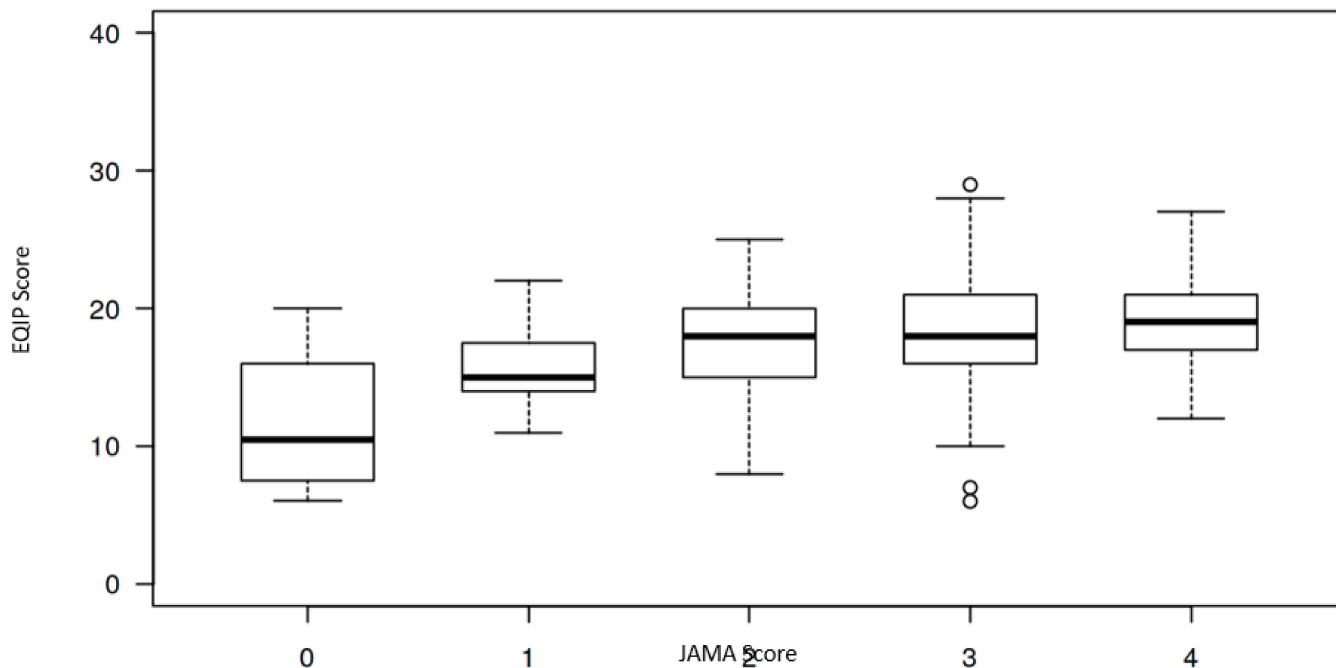

### JAMA vs DISCERN

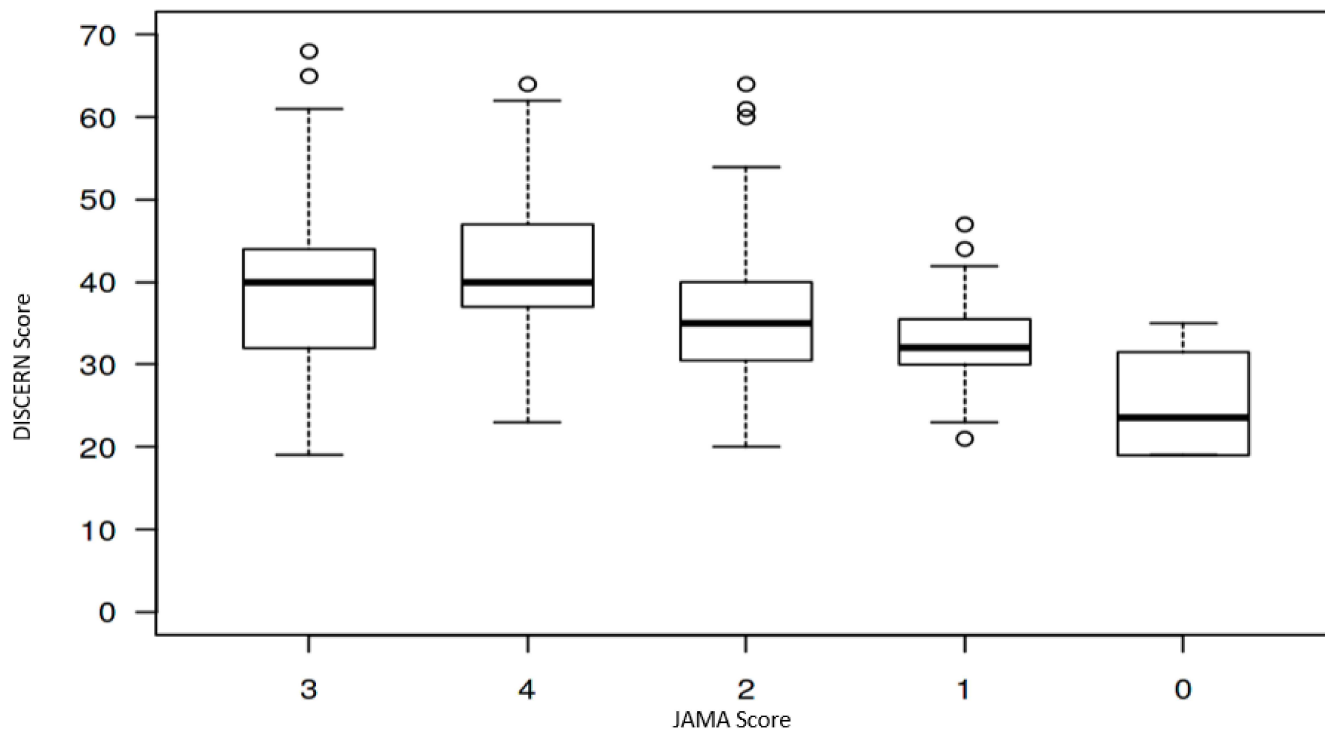

Supplement: bmjopen-2020-040487supp005.pdf [file bmjopen-2020-040487supp005.pdf]

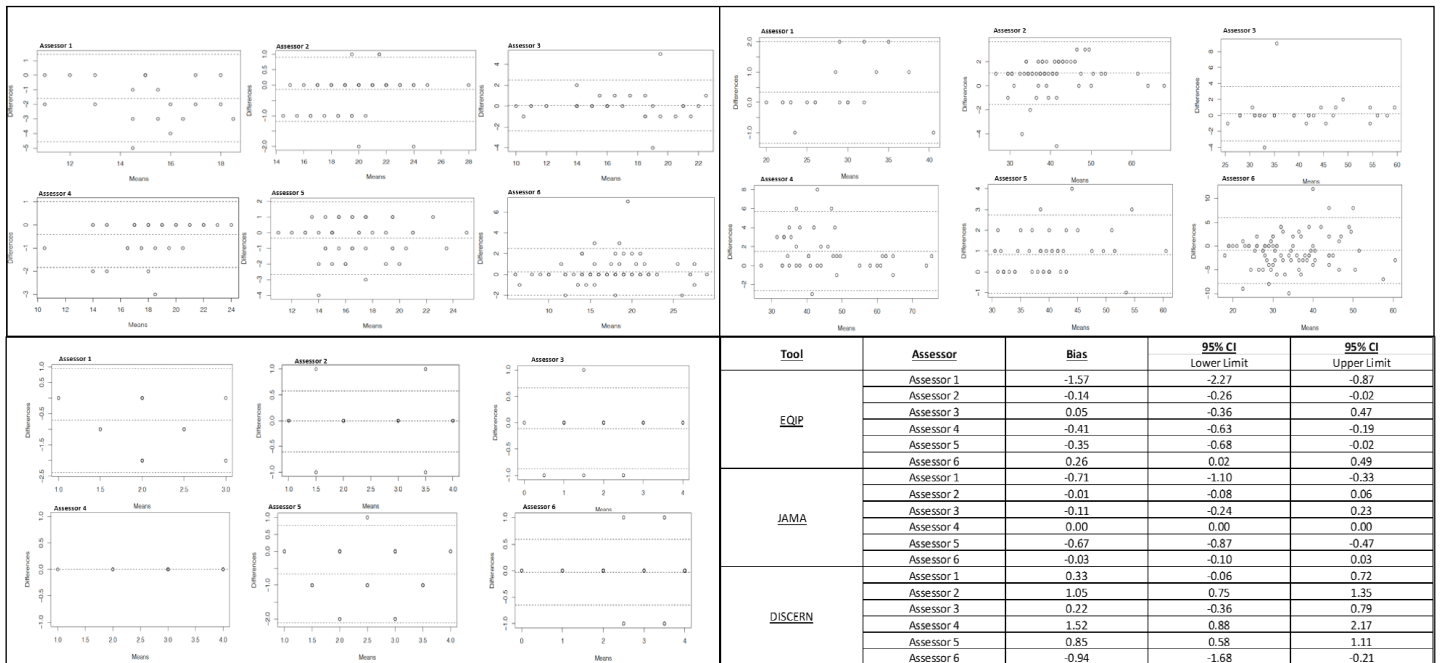

Supplement: bmjopen-2020-040487supp006.pdf [file bmjopen-2020-040487supp006.pdf]
